# Supplementary material for: MELK Downregulation in NPCs Disrupts Cortical Neurogenesis via G2/M Dysregulation: Autism Implications
Source: Research Square preprint supplement (doi:10.21203/rs.3.rs-7569882/v1), 2025-10-03
Supplement: Supplementary file 2 [file a864073eeacbd49c1b32ef78.xlsx]

## Sheet: Supplementary Table 1
Supplementary Table 1. Detailed Annotation and In Silico Predictions for the Four MELK Stopgain Variants
Chr	chr9	chr9	chr9	chr9	chr9	chr9	chr9	chr9	chr9	chr9	chr9	chr9	chr9	chr9	chr9	chr9	chr9	chr9	chr9
Start	36589558	36594634	36594673	36599460	36607663	36630325	36651800	36651816	36657315	36657335	36665361	36669342	36674850	36674870	36674870	36674875	36674907	36677333	36677336
End	36589558	36594634	36594673	36599460	36607663	36630325	36651800	36651816	36657315	36657335	36665361	36669342	36674850	36674870	36674870	36674875	36674907	36677333	36677336
Ref	C	C	C	C	A	G	C	G	G	C	C	A	C	C	C	T	C	-	-
Alt	T	T	T	A	G	A	T	A	A	T	G	T	T	G	A	A	G	AG	GAC
Func.refGene	exonic	exonic	exonic	exonic	exonic	exonic	exonic	exonic	exonic	exonic	exonic	exonic	exonic	exonic	exonic	exonic	exonic	exonic	exonic
Gene.refGene	MELK	MELK	MELK	MELK	MELK	MELK	MELK	MELK	MELK	MELK	MELK	MELK	MELK	MELK	MELK	MELK	MELK	MELK	MELK
GeneDetail.refGene	.	.	.	.	.	.	.	.	.	.	.	.	.	.	.	.	.	.	.
ExonicFunc.refGene	nonsynonymous SNV	nonsynonymous SNV	nonsynonymous SNV	nonsynonymous SNV	nonsynonymous SNV	stopgain	nonsynonymous SNV	nonsynonymous SNV	stopgain	nonsynonymous SNV	stopgain	stopgain	nonsynonymous SNV	nonsynonymous SNV	nonsynonymous SNV	nonsynonymous SNV	nonsynonymous SNV	stoploss	nonframeshift insertion
AAChange.refGene	MELK:NM_001256689:exon3:c.C71T:p.T24M,MELK:NM_001256691:exon3:c.C71T:p.T24M,MELK:NM_001256685:exon4:c.C167T:p.T56M,MELK:NM_001256687:exon4:c.C167T:p.T56M,MELK:NM_001256688:exon4:c.C167T:p.T56M,MELK:NM_014791:exon4:c.C167T:p.T56M	MELK:NM_001256690:exon3:c.C55T:p.P19S,MELK:NM_001256689:exon4:c.C172T:p.P58S,MELK:NM_001256685:exon5:c.C268T:p.P90S,MELK:NM_014791:exon5:c.C268T:p.P90S	MELK:NM_001256690:exon3:c.C94T:p.R32C,MELK:NM_001256689:exon4:c.C211T:p.R71C,MELK:NM_001256685:exon5:c.C307T:p.R103C,MELK:NM_014791:exon5:c.C307T:p.R103C	MELK:NM_001256692:exon4:c.C148A:p.Q50K,MELK:NM_001256688:exon5:c.C328A:p.Q110K,MELK:NM_001256690:exon5:c.C328A:p.Q110K,MELK:NM_001256691:exon5:c.C301A:p.Q101K,MELK:NM_001256687:exon6:c.C397A:p.Q133K,MELK:NM_001256689:exon6:c.C445A:p.Q149K,MELK:NM_001256685:exon7:c.C541A:p.Q181K,MELK:NM_014791:exon7:c.C541A:p.Q181K	MELK:NM_001256692:exon5:c.A263G:p.K88R,MELK:NM_001256688:exon6:c.A443G:p.K148R,MELK:NM_001256690:exon6:c.A443G:p.K148R,MELK:NM_001256691:exon6:c.A416G:p.K139R,MELK:NM_001256693:exon6:c.A74G:p.K25R,MELK:NM_001256687:exon7:c.A512G:p.K171R,MELK:NM_001256689:exon7:c.A560G:p.K187R,MELK:NM_001256685:exon8:c.A656G:p.K219R,MELK:NM_014791:exon8:c.A656G:p.K219R	MELK:NM_001256692:exon6:c.G300A:p.W100X,MELK:NM_001256688:exon7:c.G480A:p.W160X,MELK:NM_001256690:exon7:c.G480A:p.W160X,MELK:NM_001256691:exon7:c.G453A:p.W151X,MELK:NM_001256693:exon7:c.G111A:p.W37X,MELK:NM_001256687:exon8:c.G549A:p.W183X,MELK:NM_001256689:exon8:c.G597A:p.W199X,MELK:NM_001256685:exon9:c.G693A:p.W231X,MELK:NM_014791:exon9:c.G693A:p.W231X	MELK:NM_001256692:exon9:c.C583T:p.R195W,MELK:NM_001256688:exon10:c.C763T:p.R255W,MELK:NM_001256690:exon10:c.C763T:p.R255W,MELK:NM_001256691:exon10:c.C736T:p.R246W,MELK:NM_001256693:exon10:c.C394T:p.R132W,MELK:NM_001256687:exon11:c.C832T:p.R278W,MELK:NM_001256689:exon11:c.C880T:p.R294W,MELK:NM_001256685:exon12:c.C976T:p.R326W,MELK:NM_014791:exon12:c.C976T:p.R326W	MELK:NM_001256692:exon9:c.G599A:p.R200H,MELK:NM_001256688:exon10:c.G779A:p.R260H,MELK:NM_001256690:exon10:c.G779A:p.R260H,MELK:NM_001256691:exon10:c.G752A:p.R251H,MELK:NM_001256693:exon10:c.G410A:p.R137H,MELK:NM_001256687:exon11:c.G848A:p.R283H,MELK:NM_001256689:exon11:c.G896A:p.R299H,MELK:NM_001256685:exon12:c.G992A:p.R331H,MELK:NM_014791:exon12:c.G992A:p.R331H	MELK:NM_001256692:exon10:c.G735A:p.W245X,MELK:NM_001256688:exon11:c.G915A:p.W305X,MELK:NM_001256690:exon11:c.G915A:p.W305X,MELK:NM_001256691:exon11:c.G888A:p.W296X,MELK:NM_001256693:exon11:c.G546A:p.W182X,MELK:NM_001256687:exon12:c.G984A:p.W328X,MELK:NM_001256689:exon12:c.G1032A:p.W344X,MELK:NM_014791:exon13:c.G1128A:p.W376X	MELK:NM_001256692:exon10:c.C755T:p.T252I,MELK:NM_001256688:exon11:c.C935T:p.T312I,MELK:NM_001256690:exon11:c.C935T:p.T312I,MELK:NM_001256691:exon11:c.C908T:p.T303I,MELK:NM_001256693:exon11:c.C566T:p.T189I,MELK:NM_001256687:exon12:c.C1004T:p.T335I,MELK:NM_001256689:exon12:c.C1052T:p.T351I,MELK:NM_014791:exon13:c.C1148T:p.T383I	MELK:NM_001256692:exon11:c.C795G:p.Y265X,MELK:NM_001256688:exon12:c.C975G:p.Y325X,MELK:NM_001256690:exon12:c.C975G:p.Y325X,MELK:NM_001256691:exon12:c.C948G:p.Y316X,MELK:NM_001256693:exon12:c.C606G:p.Y202X,MELK:NM_001256685:exon13:c.C1065G:p.Y355X,MELK:NM_001256687:exon13:c.C1044G:p.Y348X,MELK:NM_001256689:exon13:c.C1092G:p.Y364X,MELK:NM_014791:exon14:c.C1188G:p.Y396X	MELK:NM_001256692:exon12:c.A1048T:p.K350X,MELK:NM_001256688:exon13:c.A1228T:p.K410X,MELK:NM_001256690:exon13:c.A1228T:p.K410X,MELK:NM_001256691:exon13:c.A1201T:p.K401X,MELK:NM_001256693:exon13:c.A859T:p.K287X,MELK:NM_001256685:exon14:c.A1318T:p.K440X,MELK:NM_001256687:exon14:c.A1297T:p.K433X,MELK:NM_001256689:exon14:c.A1345T:p.K449X,MELK:NM_014791:exon15:c.A1441T:p.K481X	MELK:NM_001256692:exon14:c.C1298T:p.T433I,MELK:NM_001256688:exon15:c.C1478T:p.T493I,MELK:NM_001256690:exon15:c.C1478T:p.T493I,MELK:NM_001256691:exon15:c.C1451T:p.T484I,MELK:NM_001256693:exon15:c.C1109T:p.T370I,MELK:NM_001256685:exon16:c.C1568T:p.T523I,MELK:NM_001256687:exon16:c.C1547T:p.T516I,MELK:NM_001256689:exon16:c.C1595T:p.T532I,MELK:NM_014791:exon17:c.C1691T:p.T564I	MELK:NM_001256692:exon14:c.C1318G:p.P440A,MELK:NM_001256688:exon15:c.C1498G:p.P500A,MELK:NM_001256690:exon15:c.C1498G:p.P500A,MELK:NM_001256691:exon15:c.C1471G:p.P491A,MELK:NM_001256693:exon15:c.C1129G:p.P377A,MELK:NM_001256685:exon16:c.C1588G:p.P530A,MELK:NM_001256687:exon16:c.C1567G:p.P523A,MELK:NM_001256689:exon16:c.C1615G:p.P539A,MELK:NM_014791:exon17:c.C1711G:p.P571A	MELK:NM_001256692:exon14:c.C1318A:p.P440T,MELK:NM_001256688:exon15:c.C1498A:p.P500T,MELK:NM_001256690:exon15:c.C1498A:p.P500T,MELK:NM_001256691:exon15:c.C1471A:p.P491T,MELK:NM_001256693:exon15:c.C1129A:p.P377T,MELK:NM_001256685:exon16:c.C1588A:p.P530T,MELK:NM_001256687:exon16:c.C1567A:p.P523T,MELK:NM_001256689:exon16:c.C1615A:p.P539T,MELK:NM_014791:exon17:c.C1711A:p.P571T	MELK:NM_001256692:exon14:c.T1323A:p.D441E,MELK:NM_001256688:exon15:c.T1503A:p.D501E,MELK:NM_001256690:exon15:c.T1503A:p.D501E,MELK:NM_001256691:exon15:c.T1476A:p.D492E,MELK:NM_001256693:exon15:c.T1134A:p.D378E,MELK:NM_001256685:exon16:c.T1593A:p.D531E,MELK:NM_001256687:exon16:c.T1572A:p.D524E,MELK:NM_001256689:exon16:c.T1620A:p.D540E,MELK:NM_014791:exon17:c.T1716A:p.D572E	MELK:NM_001256692:exon14:c.C1355G:p.P452R,MELK:NM_001256688:exon15:c.C1535G:p.P512R,MELK:NM_001256690:exon15:c.C1535G:p.P512R,MELK:NM_001256691:exon15:c.C1508G:p.P503R,MELK:NM_001256693:exon15:c.C1166G:p.P389R,MELK:NM_001256685:exon16:c.C1625G:p.P542R,MELK:NM_001256687:exon16:c.C1604G:p.P535R,MELK:NM_001256689:exon16:c.C1652G:p.P551R,MELK:NM_014791:exon17:c.C1748G:p.P583R	MELK:NM_001256692:exon15:c.1559_1560insAG:p.*521delinsDN*,MELK:NM_001256688:exon16:c.1739_1740insAG:p.*581delinsDN*,MELK:NM_001256690:exon16:c.1739_1740insAG:p.*581delinsDN*,MELK:NM_001256691:exon16:c.1712_1713insAG:p.*572delinsDN*,MELK:NM_001256693:exon16:c.1370_1371insAG:p.*458delinsDN*,MELK:NM_001256685:exon17:c.1829_1830insAG:p.*611delinsDN*,MELK:NM_001256687:exon17:c.1808_1809insAG:p.*604del…	MELK:NM_001256692:exon15:c.1562_1563insGAC:p.X521delinsX,MELK:NM_001256688:exon16:c.1742_1743insGAC:p.X581delinsX,MELK:NM_001256690:exon16:c.1742_1743insGAC:p.X581delinsX,MELK:NM_001256691:exon16:c.1715_1716insGAC:p.X572delinsX,MELK:NM_001256693:exon16:c.1373_1374insGAC:p.X458delinsX,MELK:NM_001256685:exon17:c.1832_1833insGAC:p.X611delinsX,MELK:NM_001256687:exon17:c.1811_1812insGAC:p.X604delinsX,…
avsnp150	rs35233455	.	.	rs115586289	rs35142210	rs770129579	rs148081976	rs146537035	.	rs765970263	.	.	.	.	.	.	rs141986091	.	.
EAS.sites.2015_08	.	.	.	.	0.0635	.	.	.	.	.	.	.	.	.	.	.	0.0089	.	.
CADD_raw	1.482	2.292	4.376	3.541	2.042	6.953	4.144	2.914	6.97	0.309	6.051	7.925	3.978	2.113	3.574	1.262	2.263	.	.
CADD_raw_rankscore	0.216	0.367	0.897	0.651	0.314	0.97	0.836	0.502	0.97	0.071	0.958	0.986	0.779	0.329	0.66	0.185	0.361	.	.
CADD_phred	15.62	21.5	31	24.8	19.58	36	28.1	23.2	36	4.397	35	40	26.8	20.2	25	14.11	21.3	.	.
Legend/Abbreviations (alphabetical)
AAChange.refGene: Amino acid change(s) annotated by RefSeq transcript(s).
avsnp150: dbSNP build 150 identifier.
CADD_phred, CADD_raw, CADD_raw_rankscore: Combined Annotation Dependent Depletion (CADD) scores (phred-scaled, raw, rank).
chr (Chr): Chromosome.
ExonicFunc.refGene: Functional class of variant within RefSeq gene (e.g., “stopgain,” “nonsynonymous SNV,” “nonframeshift insertion,” “stoploss”).
EAS.sites.2015_08：East Asian subset of 1000 Genomes Project Phase 3 (Aug 2015 release)
Gene.refGene: Gene symbol per RefSeq.

## Sheet: Supplementary Table 2
Supplementary Table 2. Human Cell Cycle Gene Set
G2M	S	G1
HMGB2	MCM4	CCND1
CKS2	PRIM1	CCND2
SMC4	RAD51AP1	CCND3
TUBB4B	MSH2	CCNE1
CDC25C	TIPIN	CDK2
KIF23	CHAF1B	CDK4
CTCF	MCM7	CDK6
CDK1	DTL	E2F1
NUF2	NASP	E2F3
CCNB2	POLD3	E2F4
GTSE1	EXO1	CDKN1A
KIF2C	POLA1	CDKN1B
HMMR	PCNA	CDKN2A
NEK2	GINS2	CDKN2B
NUSAP1	HELLS	CDKN2C
CKS1B	SLBP	CDKN2D
CKAP2L	RRM2	TP53
KIF20B	CASP8AP2	RB1
RANGAP1	FEN1
AURKA	CDCA7
G2E3	POLR1B
UBE2C	UBR7
MKI67	CDC6
CKAP2	CLSPN
HJURP	TYMS
NCAPD2	MCM6
PSRC1	RFC2
GAS2L3	CCNE2
TPX2	CDC45
CENPF	USP1
BUB1	RRM1
JPT1	UHRF1
CDCA2	GMNN
LBR	ATAD2
CENPA	DSCC1
BIRC5	MRPL36
TMPO	MCM5
AURKB	UNG
CDCA3	CENPU
DLGAP5	WDR76
ANLN	RAD51
CBX5	BLM
TOP2A	E2F8
TACC3
KIF11
CDC20
CDCA8
CKAP5
NDC80
PIMREG
ANP32E
TTK
ECT2
CENPE

## Sheet: Supplementary Table 3
Supplementary Table 3. G2M_melk_coexpression_partners
gene	rho_to_MELK	p_value
AURKA	0.304001	4.23194e-19
AURKB	0.446386	1.19941e-41
BUB1	0.328687	3.09827e-22
BUB3	0.341547	5.49031e-24
C21orf58	0.317402	9.13856e-21
CCNA2	0.365915	1.5414e-27
CCNB2	0.314498	2.13359e-20
CDCA3	0.339615	1.01842e-23
CDCA8	0.376017	4.19746e-29
CDK1	0.467301	5.52959e-46
CKAP2	0.313593	2.77358e-20
CKAP2L	0.389045	3.32533e-31
CKS1B	0.412333	3.33422e-35
CKS2	0.39904	6.9878e-33
DBF4	0.306945	1.85331e-19
DDX39A	0.375692	4.72284e-29
DLGAP5	0.36905	5.10704e-28
ECT2	0.313351	2.97467e-20
FAM64A	0.371426	2.19347e-28
FAM83D	0.315671	1.51683e-20
FBXO5	0.415246	1.00038e-35
GTSE1	0.357166	3.15425e-26
H2AFZ	0.351291	2.27231e-25
HJURP	0.327953	3.87855e-22
HMGB2	0.426521	8.458e-38
KIF11	0.314025	2.44743e-20
KIF20A	0.348675	5.40167e-25
KIF22	0.348789	5.20359e-25
KIF23	0.357385	2.92761e-26
KIF2C	0.362572	4.93811e-27
KNSTRN	0.316606	1.15397e-20
KPNA2	0.388805	3.64242e-31
MAD2L1	0.401624	2.51996e-33
MIS18BP1	0.389177	3.16265e-31
MXD3	0.376363	3.70234e-29
NCAPG	0.334827	4.62646e-23
NDC80	0.371895	1.85463e-28
NUF2	0.373935	8.91572e-29
NUSAP1	0.404927	6.75006e-34
PBK	0.318046	7.56374e-21
PLK1	0.306043	2.38916e-19
PRC1	0.35195	1.82496e-25
PSRC1	0.356854	3.50639e-26
RRM2	0.312755	3.53285e-20
SGOL1	0.334014	5.96468e-23
SGOL2	0.307359	1.64887e-19
SMC4	0.424897	1.70122e-37
SPC25	0.364006	3.00186e-27
TOP2A	0.387382	6.24248e-31
TPX2	0.336872	2.43192e-23
TTK	0.349618	3.9575e-25
TUBA1B	0.371972	1.80423e-28
TUBB4B	0.384269	2.00977e-30
UBE2C	0.40251	1.77195e-33
UBE2T	0.407771	2.14554e-34
ZWINT	0.371102	2.46232e-28

## Sheet: Supplementary Table 4
Supplementary Table 4. GO pathway enrichment
#category	term ID	term description	observed gene count	background gene count	strength	signal	false discovery rate	matching proteins in your network (IDs)	matching proteins in your network (labels)
GO Process	GO:0051301	Cell division	39	527	1.42	5.08	1.8e-43	9606.ENSP00000216911,9606.ENSP00000229758,9606.ENSP00000249776,9606.ENSP00000250056,9606.ENSP00000251496,9606.ENSP00000260363,9606.ENSP00000260731,9606.ENSP00000261597,9606.ENSP00000263753,9606.ENSP00000271452,9606.ENSP00000282074,9606.ENSP00000288207,9606.ENSP00000296509,9606.ENSP00000300093,9606.ENSP00000300403,9606.ENSP00000302530,9606.ENSP00000309790,9606.ENSP00000311083,9606.ENSP00000313950,…	AURKA,FBXO5,KNSTRN,PIMREG,NCAPG,KIF23,KIF11,NDC80,SGO1,NUF2,SPC25,CCNB2,MAD2L1,PLK1,TPX2,BUB1,MIS18BP1,CKS1B,AURKB,TUBA1B,SMC4,UBE2C,SGO2,BUB3,PSRC1,KIF2C,CDCA8,ZWINT,CKS2,CKAP2,ECT2,PRC1,KIF20A,CDK1,TOP2A,CDCA3,CCNA2,FAM83D,NUSAP1
GO Process	GO:0007049	Cell cycle	47	1246	1.12	3.1	3.38e-43	9606.ENSP00000160827,9606.ENSP00000216911,9606.ENSP00000229758,9606.ENSP00000247191,9606.ENSP00000249776,9606.ENSP00000250056,9606.ENSP00000251496,9606.ENSP00000260363,9606.ENSP00000260731,9606.ENSP00000261597,9606.ENSP00000263753,9606.ENSP00000265728,9606.ENSP00000271452,9606.ENSP00000282074,9606.ENSP00000288207,9606.ENSP00000296509,9606.ENSP00000300093,9606.ENSP00000300403,9606.ENSP00000302530,…	KIF22,AURKA,FBXO5,DLGAP5,KNSTRN,PIMREG,NCAPG,KIF23,KIF11,NDC80,SGO1,DBF4,NUF2,SPC25,CCNB2,MAD2L1,PLK1,TPX2,BUB1,MIS18BP1,CKS1B,AURKB,TUBA1B,TUBB4B,SMC4,UBE2C,SGO2,BUB3,TTK,PSRC1,KIF2C,CDCA8,ZWINT,CKS2,CKAP2,ECT2,PRC1,KIF20A,CDK1,TOP2A,HJURP,GTSE1,PBK,CDCA3,CCNA2,FAM83D,NUSAP1
GO Process	GO:0000278	Mitotic cell cycle	40	631	1.35	4.55	7.27e-43	9606.ENSP00000160827,9606.ENSP00000216911,9606.ENSP00000247191,9606.ENSP00000249776,9606.ENSP00000251496,9606.ENSP00000260363,9606.ENSP00000260731,9606.ENSP00000261597,9606.ENSP00000263753,9606.ENSP00000265728,9606.ENSP00000271452,9606.ENSP00000282074,9606.ENSP00000288207,9606.ENSP00000296509,9606.ENSP00000300093,9606.ENSP00000300403,9606.ENSP00000302530,9606.ENSP00000311083,9606.ENSP00000313950,…	KIF22,AURKA,DLGAP5,KNSTRN,NCAPG,KIF23,KIF11,NDC80,SGO1,DBF4,NUF2,SPC25,CCNB2,MAD2L1,PLK1,TPX2,BUB1,CKS1B,AURKB,TUBA1B,TUBB4B,SMC4,UBE2C,SGO2,BUB3,TTK,PSRC1,KIF2C,CDCA8,ZWINT,CKS2,CKAP2,ECT2,PRC1,KIF20A,CDK1,GTSE1,PBK,CCNA2,NUSAP1
GO Process	GO:1903047	Mitotic cell cycle process	37	537	1.38	4.71	4.35e-40	9606.ENSP00000160827,9606.ENSP00000216911,9606.ENSP00000247191,9606.ENSP00000249776,9606.ENSP00000251496,9606.ENSP00000260363,9606.ENSP00000260731,9606.ENSP00000261597,9606.ENSP00000263753,9606.ENSP00000265728,9606.ENSP00000271452,9606.ENSP00000282074,9606.ENSP00000288207,9606.ENSP00000296509,9606.ENSP00000300093,9606.ENSP00000300403,9606.ENSP00000302530,9606.ENSP00000311083,9606.ENSP00000313950,…	KIF22,AURKA,DLGAP5,KNSTRN,NCAPG,KIF23,KIF11,NDC80,SGO1,DBF4,NUF2,SPC25,CCNB2,MAD2L1,PLK1,TPX2,BUB1,CKS1B,AURKB,SMC4,UBE2C,SGO2,BUB3,TTK,PSRC1,KIF2C,CDCA8,ZWINT,CKS2,CKAP2,ECT2,PRC1,KIF20A,CDK1,GTSE1,CCNA2,NUSAP1
GO Process	GO:0022402	Cell cycle process	40	835	1.23	3.61	2e-38	9606.ENSP00000160827,9606.ENSP00000216911,9606.ENSP00000229758,9606.ENSP00000247191,9606.ENSP00000249776,9606.ENSP00000251496,9606.ENSP00000260363,9606.ENSP00000260731,9606.ENSP00000261597,9606.ENSP00000263753,9606.ENSP00000265728,9606.ENSP00000271452,9606.ENSP00000282074,9606.ENSP00000288207,9606.ENSP00000296509,9606.ENSP00000300093,9606.ENSP00000300403,9606.ENSP00000302530,9606.ENSP00000311083,…	KIF22,AURKA,FBXO5,DLGAP5,KNSTRN,NCAPG,KIF23,KIF11,NDC80,SGO1,DBF4,NUF2,SPC25,CCNB2,MAD2L1,PLK1,TPX2,BUB1,CKS1B,AURKB,SMC4,UBE2C,SGO2,BUB3,TTK,PSRC1,KIF2C,CDCA8,ZWINT,CKS2,CKAP2,ECT2,PRC1,KIF20A,CDK1,TOP2A,GTSE1,CCNA2,FAM83D,NUSAP1
GO Process	GO:0000280	Nuclear division	30	323	1.51	5.31	1.21e-34	9606.ENSP00000160827,9606.ENSP00000216911,9606.ENSP00000229758,9606.ENSP00000247191,9606.ENSP00000249776,9606.ENSP00000251496,9606.ENSP00000260363,9606.ENSP00000260731,9606.ENSP00000261597,9606.ENSP00000263753,9606.ENSP00000271452,9606.ENSP00000288207,9606.ENSP00000296509,9606.ENSP00000300093,9606.ENSP00000300403,9606.ENSP00000302530,9606.ENSP00000313950,9606.ENSP00000341382,9606.ENSP00000348838,…	KIF22,AURKA,FBXO5,DLGAP5,KNSTRN,NCAPG,KIF23,KIF11,NDC80,SGO1,NUF2,CCNB2,MAD2L1,PLK1,TPX2,BUB1,AURKB,SMC4,UBE2C,SGO2,BUB3,TTK,PSRC1,KIF2C,CDCA8,ZWINT,CKS2,PRC1,TOP2A,NUSAP1
GO Process	GO:0098813	Nuclear chromosome segregation	26	229	1.6	5.61	1.93e-31	9606.ENSP00000160827,9606.ENSP00000247191,9606.ENSP00000249776,9606.ENSP00000251496,9606.ENSP00000260363,9606.ENSP00000260731,9606.ENSP00000261597,9606.ENSP00000263753,9606.ENSP00000271452,9606.ENSP00000282074,9606.ENSP00000296509,9606.ENSP00000300093,9606.ENSP00000302530,9606.ENSP00000313950,9606.ENSP00000341382,9606.ENSP00000350447,9606.ENSP00000357858,9606.ENSP00000358813,9606.ENSP00000358925,…	KIF22,DLGAP5,KNSTRN,NCAPG,KIF23,KIF11,NDC80,SGO1,NUF2,SPC25,MAD2L1,PLK1,BUB1,AURKB,SMC4,SGO2,BUB3,TTK,PSRC1,KIF2C,CDCA8,ZWINT,PRC1,TOP2A,FAM83D,NUSAP1
GO Process	GO:0007059	Chromosome segregation	27	286	1.52	5.07	6.84e-31	9606.ENSP00000160827,9606.ENSP00000247191,9606.ENSP00000249776,9606.ENSP00000251496,9606.ENSP00000260363,9606.ENSP00000260731,9606.ENSP00000261597,9606.ENSP00000263753,9606.ENSP00000271452,9606.ENSP00000282074,9606.ENSP00000296509,9606.ENSP00000300093,9606.ENSP00000302530,9606.ENSP00000313950,9606.ENSP00000341382,9606.ENSP00000350447,9606.ENSP00000357858,9606.ENSP00000358813,9606.ENSP00000358925,…	KIF22,DLGAP5,KNSTRN,NCAPG,KIF23,KIF11,NDC80,SGO1,NUF2,SPC25,MAD2L1,PLK1,BUB1,AURKB,SMC4,SGO2,BUB3,TTK,PSRC1,KIF2C,CDCA8,ZWINT,PRC1,TOP2A,HJURP,FAM83D,NUSAP1
GO Process	GO:0140014	Mitotic nuclear division	24	175	1.68	6.01	1.48e-30	9606.ENSP00000160827,9606.ENSP00000216911,9606.ENSP00000247191,9606.ENSP00000249776,9606.ENSP00000251496,9606.ENSP00000260363,9606.ENSP00000260731,9606.ENSP00000261597,9606.ENSP00000263753,9606.ENSP00000271452,9606.ENSP00000296509,9606.ENSP00000300093,9606.ENSP00000300403,9606.ENSP00000313950,9606.ENSP00000341382,9606.ENSP00000348838,9606.ENSP00000350447,9606.ENSP00000357858,9606.ENSP00000358925,…	KIF22,AURKA,DLGAP5,KNSTRN,NCAPG,KIF23,KIF11,NDC80,SGO1,NUF2,MAD2L1,PLK1,TPX2,AURKB,SMC4,UBE2C,SGO2,BUB3,PSRC1,KIF2C,CDCA8,ZWINT,PRC1,NUSAP1
GO Process	GO:0000819	Sister chromatid segregation	23	144	1.75	6.39	1.56e-30	9606.ENSP00000160827,9606.ENSP00000247191,9606.ENSP00000249776,9606.ENSP00000251496,9606.ENSP00000260363,9606.ENSP00000260731,9606.ENSP00000261597,9606.ENSP00000263753,9606.ENSP00000271452,9606.ENSP00000296509,9606.ENSP00000300093,9606.ENSP00000302530,9606.ENSP00000313950,9606.ENSP00000341382,9606.ENSP00000350447,9606.ENSP00000357858,9606.ENSP00000358925,9606.ENSP00000361298,9606.ENSP00000362146,…	KIF22,DLGAP5,KNSTRN,NCAPG,KIF23,KIF11,NDC80,SGO1,NUF2,MAD2L1,PLK1,BUB1,AURKB,SMC4,SGO2,BUB3,PSRC1,KIF2C,CDCA8,ZWINT,PRC1,TOP2A,NUSAP1
GO Process	GO:0000070	Mitotic sister chromatid segregation	21	122	1.78	6.23	3.49e-28	9606.ENSP00000160827,9606.ENSP00000247191,9606.ENSP00000249776,9606.ENSP00000251496,9606.ENSP00000260363,9606.ENSP00000260731,9606.ENSP00000261597,9606.ENSP00000263753,9606.ENSP00000271452,9606.ENSP00000296509,9606.ENSP00000300093,9606.ENSP00000313950,9606.ENSP00000341382,9606.ENSP00000350447,9606.ENSP00000357858,9606.ENSP00000358925,9606.ENSP00000361298,9606.ENSP00000362146,9606.ENSP00000363055,…	KIF22,DLGAP5,KNSTRN,NCAPG,KIF23,KIF11,NDC80,SGO1,NUF2,MAD2L1,PLK1,AURKB,SMC4,SGO2,BUB3,PSRC1,KIF2C,CDCA8,ZWINT,PRC1,NUSAP1
GO Process	GO:0010564	Regulation of cell cycle process	32	716	1.2	3.13	3.71e-28	9606.ENSP00000216911,9606.ENSP00000229758,9606.ENSP00000247191,9606.ENSP00000249776,9606.ENSP00000251496,9606.ENSP00000260363,9606.ENSP00000260731,9606.ENSP00000261597,9606.ENSP00000265728,9606.ENSP00000271452,9606.ENSP00000282074,9606.ENSP00000296509,9606.ENSP00000300093,9606.ENSP00000300403,9606.ENSP00000302530,9606.ENSP00000313950,9606.ENSP00000341382,9606.ENSP00000348838,9606.ENSP00000353770,…	AURKA,FBXO5,DLGAP5,KNSTRN,NCAPG,KIF23,KIF11,NDC80,DBF4,NUF2,SPC25,MAD2L1,PLK1,TPX2,BUB1,AURKB,SMC4,UBE2C,RRM2,BUB3,TTK,PSRC1,CDCA8,ZWINT,ECT2,PRC1,KIF20A,CDK1,GTSE1,PBK,FAM83D,NUSAP1
GO Process	GO:0051726	Regulation of cell cycle	36	1108	1.06	2.5	4.87e-28	9606.ENSP00000216911,9606.ENSP00000229758,9606.ENSP00000247191,9606.ENSP00000249776,9606.ENSP00000251496,9606.ENSP00000260363,9606.ENSP00000260731,9606.ENSP00000261597,9606.ENSP00000265728,9606.ENSP00000271452,9606.ENSP00000282074,9606.ENSP00000288207,9606.ENSP00000296509,9606.ENSP00000300093,9606.ENSP00000300403,9606.ENSP00000302530,9606.ENSP00000311083,9606.ENSP00000313950,9606.ENSP00000341382,…	AURKA,FBXO5,DLGAP5,KNSTRN,NCAPG,KIF23,KIF11,NDC80,DBF4,NUF2,SPC25,CCNB2,MAD2L1,PLK1,TPX2,BUB1,CKS1B,AURKB,SMC4,UBE2C,RRM2,BUB3,TTK,PSRC1,CDCA8,ZWINT,CKS2,ECT2,PRC1,KIF20A,CDK1,GTSE1,PBK,CCNA2,FAM83D,NUSAP1
GO Process	GO:0000226	Microtubule cytoskeleton organization	25	542	1.21	2.86	4.23e-21	9606.ENSP00000216911,9606.ENSP00000229758,9606.ENSP00000247191,9606.ENSP00000249776,9606.ENSP00000260363,9606.ENSP00000260731,9606.ENSP00000261597,9606.ENSP00000263753,9606.ENSP00000271452,9606.ENSP00000282074,9606.ENSP00000288207,9606.ENSP00000296509,9606.ENSP00000300093,9606.ENSP00000300403,9606.ENSP00000313950,9606.ENSP00000336799,9606.ENSP00000341289,9606.ENSP00000358813,9606.ENSP00000358925,…	AURKA,FBXO5,DLGAP5,KNSTRN,KIF23,KIF11,NDC80,SGO1,NUF2,SPC25,CCNB2,MAD2L1,PLK1,TPX2,AURKB,TUBA1B,TUBB4B,TTK,PSRC1,KIF2C,CDCA8,PRC1,KIF20A,CDK1,NUSAP1
GO Process	GO:0051983	Regulation of chromosome segregation	17	128	1.67	4.6	1.49e-20	9606.ENSP00000229758,9606.ENSP00000247191,9606.ENSP00000251496,9606.ENSP00000261597,9606.ENSP00000271452,9606.ENSP00000282074,9606.ENSP00000296509,9606.ENSP00000300093,9606.ENSP00000302530,9606.ENSP00000313950,9606.ENSP00000341382,9606.ENSP00000348838,9606.ENSP00000357858,9606.ENSP00000358813,9606.ENSP00000361298,9606.ENSP00000362146,9606.ENSP00000363055	FBXO5,DLGAP5,NCAPG,NDC80,NUF2,SPC25,MAD2L1,PLK1,BUB1,AURKB,SMC4,UBE2C,BUB3,TTK,KIF2C,CDCA8,ZWINT
GO Process	GO:1905818	Regulation of chromosome separation	16	109	1.71	4.63	7.6e-20	9606.ENSP00000229758,9606.ENSP00000247191,9606.ENSP00000251496,9606.ENSP00000261597,9606.ENSP00000271452,9606.ENSP00000282074,9606.ENSP00000296509,9606.ENSP00000300093,9606.ENSP00000302530,9606.ENSP00000313950,9606.ENSP00000341382,9606.ENSP00000348838,9606.ENSP00000357858,9606.ENSP00000358813,9606.ENSP00000362146,9606.ENSP00000363055	FBXO5,DLGAP5,NCAPG,NDC80,NUF2,SPC25,MAD2L1,PLK1,BUB1,AURKB,SMC4,UBE2C,BUB3,TTK,CDCA8,ZWINT
GO Process	GO:0007017	Microtubule-based process	27	803	1.07	2.29	9.08e-20	9606.ENSP00000160827,9606.ENSP00000216911,9606.ENSP00000229758,9606.ENSP00000247191,9606.ENSP00000249776,9606.ENSP00000260363,9606.ENSP00000260731,9606.ENSP00000261597,9606.ENSP00000263753,9606.ENSP00000271452,9606.ENSP00000282074,9606.ENSP00000288207,9606.ENSP00000296509,9606.ENSP00000300093,9606.ENSP00000300403,9606.ENSP00000313950,9606.ENSP00000336799,9606.ENSP00000341289,9606.ENSP00000358813,…	KIF22,AURKA,FBXO5,DLGAP5,KNSTRN,KIF23,KIF11,NDC80,SGO1,NUF2,SPC25,CCNB2,MAD2L1,PLK1,TPX2,AURKB,TUBA1B,TUBB4B,TTK,PSRC1,KIF2C,CDCA8,PRC1,KIF20A,CDK1,GTSE1,NUSAP1
GO Process	GO:0045787	Positive regulation of cell cycle	21	349	1.33	3.19	1.83e-19	9606.ENSP00000216911,9606.ENSP00000229758,9606.ENSP00000247191,9606.ENSP00000251496,9606.ENSP00000260363,9606.ENSP00000261597,9606.ENSP00000265728,9606.ENSP00000296509,9606.ENSP00000311083,9606.ENSP00000313950,9606.ENSP00000341382,9606.ENSP00000348838,9606.ENSP00000353770,9606.ENSP00000358925,9606.ENSP00000362146,9606.ENSP00000364976,9606.ENSP00000376457,9606.ENSP00000378699,9606.ENSP00000428489,…	AURKA,FBXO5,DLGAP5,NCAPG,KIF23,NDC80,DBF4,MAD2L1,CKS1B,AURKB,SMC4,UBE2C,RRM2,PSRC1,CDCA8,CKS2,ECT2,CDK1,PBK,FAM83D,NUSAP1
GO Process	GO:0007346	Regulation of mitotic cell cycle	22	493	1.2	2.61	6.77e-18	9606.ENSP00000216911,9606.ENSP00000229758,9606.ENSP00000247191,9606.ENSP00000261597,9606.ENSP00000271452,9606.ENSP00000282074,9606.ENSP00000296509,9606.ENSP00000300093,9606.ENSP00000302530,9606.ENSP00000311083,9606.ENSP00000313950,9606.ENSP00000348838,9606.ENSP00000353770,9606.ENSP00000357858,9606.ENSP00000358813,9606.ENSP00000362146,9606.ENSP00000363055,9606.ENSP00000364976,9606.ENSP00000378699,…	AURKA,FBXO5,DLGAP5,NDC80,NUF2,SPC25,MAD2L1,PLK1,BUB1,CKS1B,AURKB,UBE2C,RRM2,BUB3,TTK,CDCA8,ZWINT,CKS2,CDK1,GTSE1,PBK,NUSAP1
GO Process	GO:1901987	Regulation of cell cycle phase transition	21	431	1.23	2.73	1.07e-17	9606.ENSP00000216911,9606.ENSP00000229758,9606.ENSP00000247191,9606.ENSP00000261597,9606.ENSP00000265728,9606.ENSP00000271452,9606.ENSP00000282074,9606.ENSP00000296509,9606.ENSP00000300093,9606.ENSP00000302530,9606.ENSP00000313950,9606.ENSP00000348838,9606.ENSP00000353770,9606.ENSP00000357858,9606.ENSP00000358813,9606.ENSP00000362146,9606.ENSP00000363055,9606.ENSP00000378699,9606.ENSP00000415430,…	AURKA,FBXO5,DLGAP5,NDC80,DBF4,NUF2,SPC25,MAD2L1,PLK1,BUB1,AURKB,UBE2C,RRM2,BUB3,TTK,CDCA8,ZWINT,CDK1,GTSE1,PBK,FAM83D
GO Process	GO:0007088	Regulation of mitotic nuclear division	15	118	1.65	4.08	1.08e-17	9606.ENSP00000216911,9606.ENSP00000229758,9606.ENSP00000247191,9606.ENSP00000261597,9606.ENSP00000271452,9606.ENSP00000282074,9606.ENSP00000296509,9606.ENSP00000300093,9606.ENSP00000302530,9606.ENSP00000313950,9606.ENSP00000357858,9606.ENSP00000358813,9606.ENSP00000362146,9606.ENSP00000363055,9606.ENSP00000499238	AURKA,FBXO5,DLGAP5,NDC80,NUF2,SPC25,MAD2L1,PLK1,BUB1,AURKB,BUB3,TTK,CDCA8,ZWINT,NUSAP1
GO Process	GO:0090068	Positive regulation of cell cycle process	18	251	1.4	3.29	1.33e-17	9606.ENSP00000216911,9606.ENSP00000229758,9606.ENSP00000247191,9606.ENSP00000251496,9606.ENSP00000260363,9606.ENSP00000261597,9606.ENSP00000265728,9606.ENSP00000296509,9606.ENSP00000313950,9606.ENSP00000341382,9606.ENSP00000348838,9606.ENSP00000353770,9606.ENSP00000362146,9606.ENSP00000376457,9606.ENSP00000378699,9606.ENSP00000428489,9606.ENSP00000481465,9606.ENSP00000499238	AURKA,FBXO5,DLGAP5,NCAPG,KIF23,NDC80,DBF4,MAD2L1,AURKB,SMC4,UBE2C,RRM2,CDCA8,ECT2,CDK1,PBK,FAM83D,NUSAP1
GO Process	GO:0007051	Spindle organization	16	160	1.55	3.74	1.57e-17	9606.ENSP00000216911,9606.ENSP00000229758,9606.ENSP00000247191,9606.ENSP00000249776,9606.ENSP00000260363,9606.ENSP00000260731,9606.ENSP00000261597,9606.ENSP00000271452,9606.ENSP00000282074,9606.ENSP00000288207,9606.ENSP00000300093,9606.ENSP00000300403,9606.ENSP00000313950,9606.ENSP00000358813,9606.ENSP00000362146,9606.ENSP00000377793	AURKA,FBXO5,DLGAP5,KNSTRN,KIF23,KIF11,NDC80,NUF2,SPC25,CCNB2,PLK1,TPX2,AURKB,TTK,CDCA8,PRC1
GO Process	GO:0030071	Regulation of mitotic metaphase/anaphase transition	14	91	1.73	4.27	1.77e-17	9606.ENSP00000229758,9606.ENSP00000247191,9606.ENSP00000261597,9606.ENSP00000271452,9606.ENSP00000282074,9606.ENSP00000296509,9606.ENSP00000300093,9606.ENSP00000302530,9606.ENSP00000313950,9606.ENSP00000348838,9606.ENSP00000357858,9606.ENSP00000358813,9606.ENSP00000362146,9606.ENSP00000363055	FBXO5,DLGAP5,NDC80,NUF2,SPC25,MAD2L1,PLK1,BUB1,AURKB,UBE2C,BUB3,TTK,CDCA8,ZWINT
GO Process	GO:1902850	Microtubule cytoskeleton organization involved in mitosis	15	129	1.61	3.9	3.02e-17	9606.ENSP00000216911,9606.ENSP00000247191,9606.ENSP00000260363,9606.ENSP00000260731,9606.ENSP00000261597,9606.ENSP00000271452,9606.ENSP00000282074,9606.ENSP00000296509,9606.ENSP00000300093,9606.ENSP00000300403,9606.ENSP00000313950,9606.ENSP00000358813,9606.ENSP00000362146,9606.ENSP00000377793,9606.ENSP00000499238	AURKA,DLGAP5,KIF23,KIF11,NDC80,NUF2,SPC25,MAD2L1,PLK1,TPX2,AURKB,TTK,CDCA8,PRC1,NUSAP1
GO Process	GO:0051276	Chromosome organization	26	968	0.98	1.86	1.04e-16	9606.ENSP00000160827,9606.ENSP00000247191,9606.ENSP00000249776,9606.ENSP00000251496,9606.ENSP00000260363,9606.ENSP00000260731,9606.ENSP00000261597,9606.ENSP00000263753,9606.ENSP00000271452,9606.ENSP00000296503,9606.ENSP00000296509,9606.ENSP00000300093,9606.ENSP00000302530,9606.ENSP00000313950,9606.ENSP00000341382,9606.ENSP00000350447,9606.ENSP00000357858,9606.ENSP00000358925,9606.ENSP00000361298,…	KIF22,DLGAP5,KNSTRN,NCAPG,KIF23,KIF11,NDC80,SGO1,NUF2,HMGB2,MAD2L1,PLK1,BUB1,AURKB,SMC4,SGO2,BUB3,PSRC1,KIF2C,CDCA8,ZWINT,PRC1,CDK1,TOP2A,HJURP,NUSAP1
GO Process	GO:0045841	Negative regulation of mitotic metaphase/anaphase transition	11	33	2.07	4.77	1.21e-16	9606.ENSP00000229758,9606.ENSP00000261597,9606.ENSP00000271452,9606.ENSP00000282074,9606.ENSP00000296509,9606.ENSP00000300093,9606.ENSP00000302530,9606.ENSP00000313950,9606.ENSP00000357858,9606.ENSP00000358813,9606.ENSP00000363055	FBXO5,NDC80,NUF2,SPC25,MAD2L1,PLK1,BUB1,AURKB,BUB3,TTK,ZWINT
GO Process	GO:0033047	Regulation of mitotic sister chromatid segregation	12	55	1.89	4.4	1.93e-16	9606.ENSP00000229758,9606.ENSP00000261597,9606.ENSP00000271452,9606.ENSP00000282074,9606.ENSP00000296509,9606.ENSP00000300093,9606.ENSP00000302530,9606.ENSP00000313950,9606.ENSP00000357858,9606.ENSP00000358813,9606.ENSP00000362146,9606.ENSP00000363055	FBXO5,NDC80,NUF2,SPC25,MAD2L1,PLK1,BUB1,AURKB,BUB3,TTK,CDCA8,ZWINT
GO Process	GO:0033044	Regulation of chromosome organization	17	253	1.37	3.05	2.91e-16	9606.ENSP00000229758,9606.ENSP00000247191,9606.ENSP00000251496,9606.ENSP00000261597,9606.ENSP00000271452,9606.ENSP00000282074,9606.ENSP00000296509,9606.ENSP00000300093,9606.ENSP00000302530,9606.ENSP00000313950,9606.ENSP00000341382,9606.ENSP00000348838,9606.ENSP00000357858,9606.ENSP00000358813,9606.ENSP00000362146,9606.ENSP00000363055,9606.ENSP00000411532	FBXO5,DLGAP5,NCAPG,NDC80,NUF2,SPC25,MAD2L1,PLK1,BUB1,AURKB,SMC4,UBE2C,BUB3,TTK,CDCA8,ZWINT,TOP2A
GO Process	GO:1901990	Regulation of mitotic cell cycle phase transition	18	332	1.28	2.72	8.23e-16	9606.ENSP00000216911,9606.ENSP00000229758,9606.ENSP00000247191,9606.ENSP00000261597,9606.ENSP00000271452,9606.ENSP00000282074,9606.ENSP00000296509,9606.ENSP00000300093,9606.ENSP00000302530,9606.ENSP00000313950,9606.ENSP00000348838,9606.ENSP00000353770,9606.ENSP00000357858,9606.ENSP00000358813,9606.ENSP00000362146,9606.ENSP00000363055,9606.ENSP00000378699,9606.ENSP00000415430	AURKA,FBXO5,DLGAP5,NDC80,NUF2,SPC25,MAD2L1,PLK1,BUB1,AURKB,UBE2C,RRM2,BUB3,TTK,CDCA8,ZWINT,CDK1,GTSE1
GO Process	GO:0007052	Mitotic spindle organization	13	97	1.67	3.77	1.34e-15	9606.ENSP00000216911,9606.ENSP00000247191,9606.ENSP00000260363,9606.ENSP00000260731,9606.ENSP00000261597,9606.ENSP00000271452,9606.ENSP00000282074,9606.ENSP00000300093,9606.ENSP00000300403,9606.ENSP00000313950,9606.ENSP00000358813,9606.ENSP00000362146,9606.ENSP00000377793	AURKA,DLGAP5,KIF23,KIF11,NDC80,NUF2,SPC25,PLK1,TPX2,AURKB,TTK,CDCA8,PRC1
GO Process	GO:0007094	Mitotic spindle assembly checkpoint signaling	10	31	2.05	4.33	5.23e-15	9606.ENSP00000261597,9606.ENSP00000271452,9606.ENSP00000282074,9606.ENSP00000296509,9606.ENSP00000300093,9606.ENSP00000302530,9606.ENSP00000313950,9606.ENSP00000357858,9606.ENSP00000358813,9606.ENSP00000363055	NDC80,NUF2,SPC25,MAD2L1,PLK1,BUB1,AURKB,BUB3,TTK,ZWINT
GO Process	GO:2001251	Negative regulation of chromosome organization	12	84	1.7	3.65	1.28e-14	9606.ENSP00000229758,9606.ENSP00000261597,9606.ENSP00000271452,9606.ENSP00000282074,9606.ENSP00000296509,9606.ENSP00000300093,9606.ENSP00000302530,9606.ENSP00000313950,9606.ENSP00000357858,9606.ENSP00000358813,9606.ENSP00000363055,9606.ENSP00000411532	FBXO5,NDC80,NUF2,SPC25,MAD2L1,PLK1,BUB1,AURKB,BUB3,TTK,ZWINT,TOP2A
GO Process	GO:0006996	Organelle organization	37	3470	0.57	0.88	5.26e-13	9606.ENSP00000160827,9606.ENSP00000216911,9606.ENSP00000229758,9606.ENSP00000247191,9606.ENSP00000249776,9606.ENSP00000251496,9606.ENSP00000260363,9606.ENSP00000260731,9606.ENSP00000261597,9606.ENSP00000263753,9606.ENSP00000271452,9606.ENSP00000282074,9606.ENSP00000288207,9606.ENSP00000296503,9606.ENSP00000296509,9606.ENSP00000300093,9606.ENSP00000300403,9606.ENSP00000302530,9606.ENSP00000313950,…	KIF22,AURKA,FBXO5,DLGAP5,KNSTRN,NCAPG,KIF23,KIF11,NDC80,SGO1,NUF2,SPC25,CCNB2,HMGB2,MAD2L1,PLK1,TPX2,BUB1,AURKB,TUBA1B,TUBB4B,SMC4,UBE2C,SGO2,BUB3,TTK,PSRC1,KIF2C,CDCA8,ZWINT,CKS2,PRC1,KIF20A,CDK1,TOP2A,HJURP,NUSAP1
GO Process	GO:1901991	Negative regulation of mitotic cell cycle phase transition	13	167	1.44	2.77	7.8e-13	9606.ENSP00000229758,9606.ENSP00000261597,9606.ENSP00000271452,9606.ENSP00000282074,9606.ENSP00000296509,9606.ENSP00000300093,9606.ENSP00000302530,9606.ENSP00000313950,9606.ENSP00000357858,9606.ENSP00000358813,9606.ENSP00000363055,9606.ENSP00000378699,9606.ENSP00000415430	FBXO5,NDC80,NUF2,SPC25,MAD2L1,PLK1,BUB1,AURKB,BUB3,TTK,ZWINT,CDK1,GTSE1
GO Process	GO:0140013	Meiotic nuclear division	13	171	1.43	2.73	1.02e-12	9606.ENSP00000216911,9606.ENSP00000229758,9606.ENSP00000261597,9606.ENSP00000263753,9606.ENSP00000271452,9606.ENSP00000288207,9606.ENSP00000300093,9606.ENSP00000302530,9606.ENSP00000341382,9606.ENSP00000350447,9606.ENSP00000358813,9606.ENSP00000364976,9606.ENSP00000411532	AURKA,FBXO5,NDC80,SGO1,NUF2,CCNB2,PLK1,BUB1,SMC4,SGO2,TTK,CKS2,TOP2A
GO Process	GO:0007093	Mitotic cell cycle checkpoint signaling	12	127	1.52	2.92	1.13e-12	9606.ENSP00000261597,9606.ENSP00000271452,9606.ENSP00000282074,9606.ENSP00000296509,9606.ENSP00000300093,9606.ENSP00000302530,9606.ENSP00000313950,9606.ENSP00000357858,9606.ENSP00000358813,9606.ENSP00000363055,9606.ENSP00000378699,9606.ENSP00000415430	NDC80,NUF2,SPC25,MAD2L1,PLK1,BUB1,AURKB,BUB3,TTK,ZWINT,CDK1,GTSE1
GO Process	GO:0051321	Meiotic cell cycle	14	250	1.29	2.36	4.04e-12	9606.ENSP00000216911,9606.ENSP00000229758,9606.ENSP00000261597,9606.ENSP00000263753,9606.ENSP00000271452,9606.ENSP00000288207,9606.ENSP00000300093,9606.ENSP00000302530,9606.ENSP00000341382,9606.ENSP00000350447,9606.ENSP00000357858,9606.ENSP00000358813,9606.ENSP00000364976,9606.ENSP00000411532	AURKA,FBXO5,NDC80,SGO1,NUF2,CCNB2,PLK1,BUB1,SMC4,SGO2,BUB3,TTK,CKS2,TOP2A
GO Process	GO:0033043	Regulation of organelle organization	23	1190	0.83	1.31	1.33e-11	9606.ENSP00000216911,9606.ENSP00000229758,9606.ENSP00000247191,9606.ENSP00000251496,9606.ENSP00000261597,9606.ENSP00000271452,9606.ENSP00000282074,9606.ENSP00000296509,9606.ENSP00000300093,9606.ENSP00000300403,9606.ENSP00000302530,9606.ENSP00000313950,9606.ENSP00000341382,9606.ENSP00000348838,9606.ENSP00000357858,9606.ENSP00000358813,9606.ENSP00000358925,9606.ENSP00000362146,9606.ENSP00000363055,…	AURKA,FBXO5,DLGAP5,NCAPG,NDC80,NUF2,SPC25,MAD2L1,PLK1,TPX2,BUB1,AURKB,SMC4,UBE2C,BUB3,TTK,PSRC1,CDCA8,ZWINT,CKAP2,ECT2,TOP2A,NUSAP1
GO Process	GO:0051225	Spindle assembly	10	96	1.56	2.64	9.56e-11	9606.ENSP00000216911,9606.ENSP00000229758,9606.ENSP00000260363,9606.ENSP00000260731,9606.ENSP00000261597,9606.ENSP00000288207,9606.ENSP00000300403,9606.ENSP00000313950,9606.ENSP00000362146,9606.ENSP00000377793	AURKA,FBXO5,KIF23,KIF11,NDC80,CCNB2,TPX2,AURKB,CDCA8,PRC1
GO Process	GO:0010639	Negative regulation of organelle organization	14	351	1.15	1.84	3.02e-10	9606.ENSP00000229758,9606.ENSP00000261597,9606.ENSP00000271452,9606.ENSP00000282074,9606.ENSP00000296509,9606.ENSP00000300093,9606.ENSP00000300403,9606.ENSP00000302530,9606.ENSP00000313950,9606.ENSP00000357858,9606.ENSP00000358813,9606.ENSP00000363055,9606.ENSP00000367276,9606.ENSP00000411532	FBXO5,NDC80,NUF2,SPC25,MAD2L1,PLK1,TPX2,BUB1,AURKB,BUB3,TTK,ZWINT,CKAP2,TOP2A
GO Process	GO:0008608	Attachment of spindle microtubules to kinetochore	7	26	1.98	2.82	9.86e-10	9606.ENSP00000261597,9606.ENSP00000263753,9606.ENSP00000271452,9606.ENSP00000282074,9606.ENSP00000313950,9606.ENSP00000357858,9606.ENSP00000361298	NDC80,SGO1,NUF2,SPC25,AURKB,BUB3,KIF2C
GO Process	GO:0007143	Female meiotic nuclear division	7	34	1.86	2.54	5.02e-09	9606.ENSP00000216911,9606.ENSP00000229758,9606.ENSP00000261597,9606.ENSP00000288207,9606.ENSP00000300093,9606.ENSP00000358813,9606.ENSP00000411532	AURKA,FBXO5,NDC80,CCNB2,PLK1,TTK,TOP2A
GO Process	GO:0016043	Cellular component organization	39	5436	0.4	0.58	1.89e-08	9606.ENSP00000160827,9606.ENSP00000216911,9606.ENSP00000229758,9606.ENSP00000247191,9606.ENSP00000249776,9606.ENSP00000251496,9606.ENSP00000260363,9606.ENSP00000260731,9606.ENSP00000261597,9606.ENSP00000263753,9606.ENSP00000271452,9606.ENSP00000282074,9606.ENSP00000288207,9606.ENSP00000296503,9606.ENSP00000296509,9606.ENSP00000300093,9606.ENSP00000300403,9606.ENSP00000302530,9606.ENSP00000313950,…	KIF22,AURKA,FBXO5,DLGAP5,KNSTRN,NCAPG,KIF23,KIF11,NDC80,SGO1,NUF2,SPC25,CCNB2,HMGB2,MAD2L1,PLK1,TPX2,BUB1,AURKB,TUBA1B,TUBB4B,SMC4,UBE2C,SGO2,RRM2,BUB3,TTK,PSRC1,KIF2C,CDCA8,ZWINT,CKS2,ECT2,PRC1,KIF20A,CDK1,TOP2A,HJURP,NUSAP1
GO Process	GO:0007127	Meiosis I	9	126	1.4	1.93	3.31e-08	9606.ENSP00000216911,9606.ENSP00000229758,9606.ENSP00000261597,9606.ENSP00000263753,9606.ENSP00000288207,9606.ENSP00000300093,9606.ENSP00000350447,9606.ENSP00000364976,9606.ENSP00000411532	AURKA,FBXO5,NDC80,SGO1,CCNB2,PLK1,SGO2,CKS2,TOP2A
GO Process	GO:0044770	Cell cycle phase transition	10	183	1.28	1.78	3.44e-08	9606.ENSP00000216911,9606.ENSP00000261597,9606.ENSP00000265728,9606.ENSP00000288207,9606.ENSP00000300093,9606.ENSP00000311083,9606.ENSP00000348838,9606.ENSP00000364976,9606.ENSP00000378699,9606.ENSP00000481380	AURKA,NDC80,DBF4,CCNB2,PLK1,CKS1B,UBE2C,CKS2,CDK1,CCNA2
GO Process	GO:0000281	Mitotic cytokinesis	8	84	1.53	2.04	4.24e-08	9606.ENSP00000260363,9606.ENSP00000300093,9606.ENSP00000313950,9606.ENSP00000362146,9606.ENSP00000367276,9606.ENSP00000376457,9606.ENSP00000378356,9606.ENSP00000499238	KIF23,PLK1,AURKB,CDCA8,CKAP2,ECT2,KIF20A,NUSAP1
GO Process	GO:0050000	Chromosome localization	8	84	1.53	2.04	4.24e-08	9606.ENSP00000160827,9606.ENSP00000247191,9606.ENSP00000261597,9606.ENSP00000271452,9606.ENSP00000358925,9606.ENSP00000361298,9606.ENSP00000362146,9606.ENSP00000481465	KIF22,DLGAP5,NDC80,NUF2,PSRC1,KIF2C,CDCA8,FAM83D
GO Process	GO:0032465	Regulation of cytokinesis	8	94	1.48	1.92	9.38e-08	9606.ENSP00000216911,9606.ENSP00000260363,9606.ENSP00000300093,9606.ENSP00000313950,9606.ENSP00000362146,9606.ENSP00000376457,9606.ENSP00000377793,9606.ENSP00000378356	AURKA,KIF23,PLK1,AURKB,CDCA8,ECT2,PRC1,KIF20A
GO Process	GO:0045132	Meiotic chromosome segregation	8	98	1.46	1.87	1.26e-07	9606.ENSP00000263753,9606.ENSP00000271452,9606.ENSP00000300093,9606.ENSP00000302530,9606.ENSP00000341382,9606.ENSP00000350447,9606.ENSP00000358813,9606.ENSP00000411532	SGO1,NUF2,PLK1,BUB1,SMC4,SGO2,TTK,TOP2A
GO Process	GO:0051231	Spindle elongation	5	13	2.13	2.16	2.62e-07	9606.ENSP00000260363,9606.ENSP00000260731,9606.ENSP00000313950,9606.ENSP00000362146,9606.ENSP00000377793	KIF23,KIF11,AURKB,CDCA8,PRC1
GO Process	GO:0051310	Metaphase plate congression	7	65	1.58	1.9	2.62e-07	9606.ENSP00000160827,9606.ENSP00000261597,9606.ENSP00000271452,9606.ENSP00000358925,9606.ENSP00000361298,9606.ENSP00000362146,9606.ENSP00000481465	KIF22,NDC80,NUF2,PSRC1,KIF2C,CDCA8,FAM83D
GO Process	GO:0140694	Non-membrane-bounded organelle assembly	11	314	1.09	1.4	3.12e-07	9606.ENSP00000216911,9606.ENSP00000229758,9606.ENSP00000247191,9606.ENSP00000260363,9606.ENSP00000260731,9606.ENSP00000261597,9606.ENSP00000288207,9606.ENSP00000300403,9606.ENSP00000313950,9606.ENSP00000362146,9606.ENSP00000377793	AURKA,FBXO5,DLGAP5,KIF23,KIF11,NDC80,CCNB2,TPX2,AURKB,CDCA8,PRC1
GO Process	GO:0044772	Mitotic cell cycle phase transition	9	173	1.26	1.58	3.96e-07	9606.ENSP00000216911,9606.ENSP00000265728,9606.ENSP00000288207,9606.ENSP00000300093,9606.ENSP00000311083,9606.ENSP00000348838,9606.ENSP00000364976,9606.ENSP00000378699,9606.ENSP00000481380	AURKA,DBF4,CCNB2,PLK1,CKS1B,UBE2C,CKS2,CDK1,CCNA2
GO Process	GO:0007057	Spindle assembly involved in female meiosis I	4	4	2.55	2.09	7.59e-07	9606.ENSP00000216911,9606.ENSP00000229758,9606.ENSP00000261597,9606.ENSP00000288207	AURKA,FBXO5,NDC80,CCNB2
GO Process	GO:0030261	Chromosome condensation	6	42	1.7	1.85	8.23e-07	9606.ENSP00000251496,9606.ENSP00000300093,9606.ENSP00000341382,9606.ENSP00000378699,9606.ENSP00000411532,9606.ENSP00000499238	NCAPG,PLK1,SMC4,CDK1,TOP2A,NUSAP1
GO Process	GO:1901978	Positive regulation of cell cycle checkpoint	5	19	1.97	1.92	1.15e-06	9606.ENSP00000261597,9606.ENSP00000296509,9606.ENSP00000313950,9606.ENSP00000362146,9606.ENSP00000428489	NDC80,MAD2L1,AURKB,CDCA8,PBK
GO Process	GO:0051128	Regulation of cellular component organization	24	2365	0.55	0.7	1.37e-06	9606.ENSP00000216911,9606.ENSP00000229758,9606.ENSP00000247191,9606.ENSP00000251496,9606.ENSP00000261597,9606.ENSP00000271452,9606.ENSP00000282074,9606.ENSP00000296509,9606.ENSP00000300093,9606.ENSP00000300403,9606.ENSP00000302530,9606.ENSP00000313950,9606.ENSP00000341382,9606.ENSP00000348838,9606.ENSP00000357858,9606.ENSP00000358813,9606.ENSP00000358925,9606.ENSP00000362146,9606.ENSP00000363055,…	AURKA,FBXO5,DLGAP5,NCAPG,NDC80,NUF2,SPC25,MAD2L1,PLK1,TPX2,BUB1,AURKB,SMC4,UBE2C,BUB3,TTK,PSRC1,CDCA8,ZWINT,CKAP2,ECT2,TOP2A,HJURP,NUSAP1
GO Process	GO:0090307	Mitotic spindle assembly	6	51	1.62	1.69	2.25e-06	9606.ENSP00000260363,9606.ENSP00000260731,9606.ENSP00000300403,9606.ENSP00000313950,9606.ENSP00000362146,9606.ENSP00000377793	KIF23,KIF11,TPX2,AURKB,CDCA8,PRC1
GO Process	GO:0007080	Mitotic metaphase plate congression	6	53	1.6	1.66	2.75e-06	9606.ENSP00000160827,9606.ENSP00000261597,9606.ENSP00000271452,9606.ENSP00000358925,9606.ENSP00000361298,9606.ENSP00000362146	KIF22,NDC80,NUF2,PSRC1,KIF2C,CDCA8
GO Process	GO:1905820	Positive regulation of chromosome separation	5	28	1.8	1.66	5.87e-06	9606.ENSP00000247191,9606.ENSP00000251496,9606.ENSP00000313950,9606.ENSP00000341382,9606.ENSP00000362146	DLGAP5,NCAPG,AURKB,SMC4,CDCA8
GO Process	GO:0044839	Cell cycle G2/M phase transition	6	62	1.53	1.53	6.42e-06	9606.ENSP00000216911,9606.ENSP00000261597,9606.ENSP00000288207,9606.ENSP00000300093,9606.ENSP00000378699,9606.ENSP00000481380	AURKA,NDC80,CCNB2,PLK1,CDK1,CCNA2
GO Process	GO:0051256	Mitotic spindle midzone assembly	4	11	2.11	1.63	1.28e-05	9606.ENSP00000260363,9606.ENSP00000313950,9606.ENSP00000362146,9606.ENSP00000377793	KIF23,AURKB,CDCA8,PRC1
GO Process	GO:0090267	Positive regulation of mitotic cell cycle spindle assembly checkpoint	4	12	2.07	1.59	1.66e-05	9606.ENSP00000261597,9606.ENSP00000296509,9606.ENSP00000313950,9606.ENSP00000362146	NDC80,MAD2L1,AURKB,CDCA8
GO Process	GO:0051656	Establishment of organelle localization	10	380	0.97	1.02	2.01e-05	9606.ENSP00000160827,9606.ENSP00000261597,9606.ENSP00000271452,9606.ENSP00000296509,9606.ENSP00000300093,9606.ENSP00000358925,9606.ENSP00000361298,9606.ENSP00000362146,9606.ENSP00000481465,9606.ENSP00000499238	KIF22,NDC80,NUF2,MAD2L1,PLK1,PSRC1,KIF2C,CDCA8,FAM83D,NUSAP1
GO Process	GO:0051338	Regulation of transferase activity	14	912	0.73	0.79	3.17e-05	9606.ENSP00000229758,9606.ENSP00000265728,9606.ENSP00000288207,9606.ENSP00000296509,9606.ENSP00000300093,9606.ENSP00000300403,9606.ENSP00000311083,9606.ENSP00000313950,9606.ENSP00000348838,9606.ENSP00000357858,9606.ENSP00000358925,9606.ENSP00000364976,9606.ENSP00000376457,9606.ENSP00000481380	FBXO5,DBF4,CCNB2,MAD2L1,PLK1,TPX2,CKS1B,AURKB,UBE2C,BUB3,PSRC1,CKS2,ECT2,CCNA2
GO Process	GO:0007062	Sister chromatid cohesion	5	42	1.62	1.39	3.23e-05	9606.ENSP00000160827,9606.ENSP00000263753,9606.ENSP00000300093,9606.ENSP00000302530,9606.ENSP00000350447	KIF22,SGO1,PLK1,BUB1,SGO2
GO Process	GO:0051640	Organelle localization	11	514	0.88	0.92	3.23e-05	9606.ENSP00000160827,9606.ENSP00000247191,9606.ENSP00000261597,9606.ENSP00000271452,9606.ENSP00000296509,9606.ENSP00000300093,9606.ENSP00000358925,9606.ENSP00000361298,9606.ENSP00000362146,9606.ENSP00000481465,9606.ENSP00000499238	KIF22,DLGAP5,NDC80,NUF2,MAD2L1,PLK1,PSRC1,KIF2C,CDCA8,FAM83D,NUSAP1
GO Process	GO:0007098	Centrosome cycle	6	88	1.38	1.26	3.95e-05	9606.ENSP00000216911,9606.ENSP00000260731,9606.ENSP00000261597,9606.ENSP00000263753,9606.ENSP00000300093,9606.ENSP00000378699	AURKA,KIF11,NDC80,SGO1,PLK1,CDK1
GO Process	GO:0034501	Protein localization to kinetochore	4	16	1.94	1.44	4.01e-05	9606.ENSP00000313950,9606.ENSP00000357858,9606.ENSP00000358813,9606.ENSP00000378699	AURKB,BUB3,TTK,CDK1
GO Process	GO:0007076	Mitotic chromosome condensation	4	17	1.92	1.41	4.81e-05	9606.ENSP00000251496,9606.ENSP00000300093,9606.ENSP00000341382,9606.ENSP00000499238	NCAPG,PLK1,SMC4,NUSAP1
COMPARTMENTS	GOCC:0005819	Spindle	23	289	1.45	4.08	7.41e-24	9606.ENSP00000160827,9606.ENSP00000216911,9606.ENSP00000229758,9606.ENSP00000247191,9606.ENSP00000249776,9606.ENSP00000260363,9606.ENSP00000260731,9606.ENSP00000263753,9606.ENSP00000296509,9606.ENSP00000300093,9606.ENSP00000300403,9606.ENSP00000305204,9606.ENSP00000313950,9606.ENSP00000341289,9606.ENSP00000358813,9606.ENSP00000358925,9606.ENSP00000362146,9606.ENSP00000367276,9606.ENSP00000376457,…	KIF22,AURKA,FBXO5,DLGAP5,KNSTRN,KIF23,KIF11,SGO1,MAD2L1,PLK1,TPX2,CKAP2L,AURKB,TUBB4B,TTK,PSRC1,CDCA8,CKAP2,ECT2,PRC1,KIF20A,CDK1,FAM83D
COMPARTMENTS	GOCC:0000775	Chromosome, centromeric region	18	160	1.6	4.36	1.16e-20	9606.ENSP00000160827,9606.ENSP00000249776,9606.ENSP00000261597,9606.ENSP00000263753,9606.ENSP00000271452,9606.ENSP00000282074,9606.ENSP00000296509,9606.ENSP00000300093,9606.ENSP00000302530,9606.ENSP00000309790,9606.ENSP00000313950,9606.ENSP00000350447,9606.ENSP00000357858,9606.ENSP00000358813,9606.ENSP00000361298,9606.ENSP00000362146,9606.ENSP00000363055,9606.ENSP00000414109	KIF22,KNSTRN,NDC80,SGO1,NUF2,SPC25,MAD2L1,PLK1,BUB1,MIS18BP1,AURKB,SGO2,BUB3,TTK,KIF2C,CDCA8,ZWINT,HJURP
COMPARTMENTS	GOCC:0000793	Condensed chromosome	19	205	1.51	4.03	1.16e-20	9606.ENSP00000160827,9606.ENSP00000249776,9606.ENSP00000251496,9606.ENSP00000261597,9606.ENSP00000263753,9606.ENSP00000271452,9606.ENSP00000282074,9606.ENSP00000296503,9606.ENSP00000296509,9606.ENSP00000300093,9606.ENSP00000302530,9606.ENSP00000313950,9606.ENSP00000341382,9606.ENSP00000350447,9606.ENSP00000357858,9606.ENSP00000358813,9606.ENSP00000361298,9606.ENSP00000363055,9606.ENSP00000414109	KIF22,KNSTRN,NCAPG,NDC80,SGO1,NUF2,SPC25,HMGB2,MAD2L1,PLK1,BUB1,AURKB,SMC4,SGO2,BUB3,TTK,KIF2C,ZWINT,HJURP
COMPARTMENTS	GOCC:0000779	Condensed chromosome, centromeric region	16	112	1.7	4.62	5.19e-20	9606.ENSP00000160827,9606.ENSP00000249776,9606.ENSP00000261597,9606.ENSP00000263753,9606.ENSP00000271452,9606.ENSP00000282074,9606.ENSP00000296509,9606.ENSP00000300093,9606.ENSP00000302530,9606.ENSP00000313950,9606.ENSP00000350447,9606.ENSP00000357858,9606.ENSP00000358813,9606.ENSP00000361298,9606.ENSP00000363055,9606.ENSP00000414109	KIF22,KNSTRN,NDC80,SGO1,NUF2,SPC25,MAD2L1,PLK1,BUB1,AURKB,SGO2,BUB3,TTK,KIF2C,ZWINT,HJURP
COMPARTMENTS	GOCC:0043232	Intracellular non-membrane-bounded organelle	43	3309	0.66	1.13	5.19e-20	9606.ENSP00000160827,9606.ENSP00000216911,9606.ENSP00000229758,9606.ENSP00000247191,9606.ENSP00000249776,9606.ENSP00000251496,9606.ENSP00000260363,9606.ENSP00000260731,9606.ENSP00000261597,9606.ENSP00000263753,9606.ENSP00000265728,9606.ENSP00000271452,9606.ENSP00000282074,9606.ENSP00000288207,9606.ENSP00000296417,9606.ENSP00000296503,9606.ENSP00000296509,9606.ENSP00000300093,9606.ENSP00000300403,…	KIF22,AURKA,FBXO5,DLGAP5,KNSTRN,NCAPG,KIF23,KIF11,NDC80,SGO1,DBF4,NUF2,SPC25,CCNB2,H2AZ1,HMGB2,MAD2L1,PLK1,TPX2,BUB1,CKAP2L,MIS18BP1,AURKB,TUBA1B,TUBB4B,SMC4,SGO2,BUB3,TTK,PSRC1,KIF2C,CDCA8,ZWINT,CKAP2,ECT2,PRC1,KIF20A,CDK1,TOP2A,HJURP,GTSE1,FAM83D,UBE2T
COMPARTMENTS	GOCC:0098687	Chromosomal region	19	227	1.47	3.79	5.19e-20	9606.ENSP00000160827,9606.ENSP00000249776,9606.ENSP00000261597,9606.ENSP00000263753,9606.ENSP00000271452,9606.ENSP00000282074,9606.ENSP00000296509,9606.ENSP00000300093,9606.ENSP00000302530,9606.ENSP00000309790,9606.ENSP00000313950,9606.ENSP00000350447,9606.ENSP00000357858,9606.ENSP00000358813,9606.ENSP00000361298,9606.ENSP00000362146,9606.ENSP00000363055,9606.ENSP00000378699,9606.ENSP00000414109	KIF22,KNSTRN,NDC80,SGO1,NUF2,SPC25,MAD2L1,PLK1,BUB1,MIS18BP1,AURKB,SGO2,BUB3,TTK,KIF2C,CDCA8,ZWINT,CDK1,HJURP
COMPARTMENTS	GOCC:0000776	Kinetochore	16	115	1.69	4.58	5.21e-20	9606.ENSP00000160827,9606.ENSP00000249776,9606.ENSP00000261597,9606.ENSP00000263753,9606.ENSP00000271452,9606.ENSP00000282074,9606.ENSP00000296509,9606.ENSP00000300093,9606.ENSP00000302530,9606.ENSP00000313950,9606.ENSP00000350447,9606.ENSP00000357858,9606.ENSP00000358813,9606.ENSP00000361298,9606.ENSP00000363055,9606.ENSP00000414109	KIF22,KNSTRN,NDC80,SGO1,NUF2,SPC25,MAD2L1,PLK1,BUB1,AURKB,SGO2,BUB3,TTK,KIF2C,ZWINT,HJURP
COMPARTMENTS	GOCC:0015630	Microtubule cytoskeleton	28	973	1.01	2.05	1.88e-19	9606.ENSP00000160827,9606.ENSP00000216911,9606.ENSP00000229758,9606.ENSP00000247191,9606.ENSP00000249776,9606.ENSP00000260363,9606.ENSP00000260731,9606.ENSP00000261597,9606.ENSP00000263753,9606.ENSP00000288207,9606.ENSP00000296509,9606.ENSP00000300093,9606.ENSP00000300403,9606.ENSP00000305204,9606.ENSP00000313950,9606.ENSP00000336799,9606.ENSP00000341289,9606.ENSP00000358813,9606.ENSP00000358925,…	KIF22,AURKA,FBXO5,DLGAP5,KNSTRN,KIF23,KIF11,NDC80,SGO1,CCNB2,MAD2L1,PLK1,TPX2,CKAP2L,AURKB,TUBA1B,TUBB4B,TTK,PSRC1,KIF2C,CDCA8,CKAP2,ECT2,PRC1,KIF20A,CDK1,GTSE1,FAM83D
COMPARTMENTS	GOCC:0072686	Mitotic spindle	14	133	1.57	3.54	8.67e-16	9606.ENSP00000160827,9606.ENSP00000216911,9606.ENSP00000249776,9606.ENSP00000260363,9606.ENSP00000260731,9606.ENSP00000296509,9606.ENSP00000300403,9606.ENSP00000305204,9606.ENSP00000341289,9606.ENSP00000367276,9606.ENSP00000376457,9606.ENSP00000377793,9606.ENSP00000378699,9606.ENSP00000481465	KIF22,AURKA,KNSTRN,KIF23,KIF11,MAD2L1,TPX2,CKAP2L,TUBB4B,CKAP2,ECT2,PRC1,CDK1,FAM83D
COMPARTMENTS	GOCC:0005694	Chromosome	24	951	0.95	1.71	6.66e-15	9606.ENSP00000160827,9606.ENSP00000249776,9606.ENSP00000251496,9606.ENSP00000261597,9606.ENSP00000263753,9606.ENSP00000265728,9606.ENSP00000271452,9606.ENSP00000282074,9606.ENSP00000296417,9606.ENSP00000296503,9606.ENSP00000296509,9606.ENSP00000300093,9606.ENSP00000302530,9606.ENSP00000309790,9606.ENSP00000313950,9606.ENSP00000341382,9606.ENSP00000350447,9606.ENSP00000357858,9606.ENSP00000358813,…	KIF22,KNSTRN,NCAPG,NDC80,SGO1,DBF4,NUF2,SPC25,H2AZ1,HMGB2,MAD2L1,PLK1,BUB1,MIS18BP1,AURKB,SMC4,SGO2,BUB3,TTK,KIF2C,CDCA8,ZWINT,CDK1,HJURP
GO Process	GO:0016572	Histone phosphorylation	4	33	1.63	1.07	0.00044	9606.ENSP00000216911,9606.ENSP00000313950,9606.ENSP00000378699,9606.ENSP00000481380	AURKA,AURKB,CDK1,CCNA2
GO Process	GO:0040001	Establishment of mitotic spindle localization	4	39	1.56	0.98	0.0008	9606.ENSP00000261597,9606.ENSP00000296509,9606.ENSP00000300093,9606.ENSP00000499238	NDC80,MAD2L1,PLK1,NUSAP1
GO Process	GO:0051641	Cellular localization	21	2677	0.44	0.46	0.00085	9606.ENSP00000160827,9606.ENSP00000216911,9606.ENSP00000242776,9606.ENSP00000261597,9606.ENSP00000271452,9606.ENSP00000296509,9606.ENSP00000300093,9606.ENSP00000313950,9606.ENSP00000336799,9606.ENSP00000357858,9606.ENSP00000358813,9606.ENSP00000358925,9606.ENSP00000361298,9606.ENSP00000362146,9606.ENSP00000363055,9606.ENSP00000376457,9606.ENSP00000378356,9606.ENSP00000378699,9606.ENSP00000438483,…	KIF22,AURKA,DDX39A,NDC80,NUF2,MAD2L1,PLK1,AURKB,TUBA1B,BUB3,TTK,PSRC1,KIF2C,CDCA8,ZWINT,ECT2,KIF20A,CDK1,KPNA2,FAM83D,NUSAP1
GO Process	GO:0034502	Protein localization to chromosome	5	92	1.28	0.89	0.00096	9606.ENSP00000300093,9606.ENSP00000313950,9606.ENSP00000357858,9606.ENSP00000358813,9606.ENSP00000378699	PLK1,AURKB,BUB3,TTK,CDK1
GO Process	GO:1901992	Positive regulation of mitotic cell cycle phase transition	5	92	1.28	0.89	0.00096	9606.ENSP00000229758,9606.ENSP00000247191,9606.ENSP00000348838,9606.ENSP00000353770,9606.ENSP00000378699	FBXO5,DLGAP5,UBE2C,RRM2,CDK1
GO Process	GO:0001932	Regulation of protein phosphorylation	13	1108	0.62	0.55	0.0013	9606.ENSP00000265728,9606.ENSP00000288207,9606.ENSP00000300093,9606.ENSP00000300403,9606.ENSP00000311083,9606.ENSP00000313950,9606.ENSP00000358813,9606.ENSP00000358925,9606.ENSP00000362146,9606.ENSP00000364976,9606.ENSP00000376457,9606.ENSP00000428489,9606.ENSP00000481380	DBF4,CCNB2,PLK1,TPX2,CKS1B,AURKB,TTK,PSRC1,CDCA8,CKS2,ECT2,PBK,CCNA2
GO Process	GO:0010389	Regulation of G2/M transition of mitotic cell cycle	5	99	1.25	0.84	0.0013	9606.ENSP00000216911,9606.ENSP00000229758,9606.ENSP00000300093,9606.ENSP00000313950,9606.ENSP00000378699	AURKA,FBXO5,PLK1,AURKB,CDK1
GO Process	GO:0032467	Positive regulation of cytokinesis	4	45	1.5	0.91	0.0013	9606.ENSP00000260363,9606.ENSP00000313950,9606.ENSP00000362146,9606.ENSP00000376457	KIF23,AURKB,CDCA8,ECT2
GO Process	GO:0051315	Attachment of mitotic spindle microtubules to kinetochore	3	13	1.91	0.96	0.0013	9606.ENSP00000261597,9606.ENSP00000271452,9606.ENSP00000361298	NDC80,NUF2,KIF2C
GO Process	GO:0035556	Intracellular signal transduction	15	1518	0.54	0.5	0.0018	9606.ENSP00000261597,9606.ENSP00000271452,9606.ENSP00000282074,9606.ENSP00000296509,9606.ENSP00000300093,9606.ENSP00000302530,9606.ENSP00000313950,9606.ENSP00000357858,9606.ENSP00000358813,9606.ENSP00000363055,9606.ENSP00000376457,9606.ENSP00000378699,9606.ENSP00000415430,9606.ENSP00000428489,9606.ENSP00000481380	NDC80,NUF2,SPC25,MAD2L1,PLK1,BUB1,AURKB,BUB3,TTK,ZWINT,ECT2,CDK1,GTSE1,PBK,CCNA2
GO Process	GO:0018105	Peptidyl-serine phosphorylation	6	193	1.04	0.71	0.0023	9606.ENSP00000216911,9606.ENSP00000300093,9606.ENSP00000313950,9606.ENSP00000358813,9606.ENSP00000378699,9606.ENSP00000428489	AURKA,PLK1,AURKB,TTK,CDK1,PBK
GO Process	GO:0051177	Meiotic sister chromatid cohesion	3	16	1.82	0.88	0.0023	9606.ENSP00000263753,9606.ENSP00000302530,9606.ENSP00000350447	SGO1,BUB1,SGO2
GO Process	GO:0022412	Cellular process involved in reproduction in multicellular organism	8	417	0.83	0.62	0.0026	9606.ENSP00000216911,9606.ENSP00000229758,9606.ENSP00000261597,9606.ENSP00000288207,9606.ENSP00000296503,9606.ENSP00000300093,9606.ENSP00000358813,9606.ENSP00000411532	AURKA,FBXO5,NDC80,CCNB2,HMGB2,PLK1,TTK,TOP2A
GO Process	GO:0000086	G2/M transition of mitotic cell cycle	4	58	1.38	0.78	0.003	9606.ENSP00000216911,9606.ENSP00000300093,9606.ENSP00000378699,9606.ENSP00000481380	AURKA,PLK1,CDK1,CCNA2
GO Process	GO:1901970	Positive regulation of mitotic sister chromatid separation	3	19	1.74	0.82	0.0033	9606.ENSP00000247191,9606.ENSP00000313950,9606.ENSP00000362146	DLGAP5,AURKB,CDCA8
GO Process	GO:0051347	Positive regulation of transferase activity	9	586	0.73	0.54	0.0042	9606.ENSP00000265728,9606.ENSP00000300093,9606.ENSP00000300403,9606.ENSP00000311083,9606.ENSP00000313950,9606.ENSP00000348838,9606.ENSP00000358925,9606.ENSP00000364976,9606.ENSP00000376457	DBF4,PLK1,TPX2,CKS1B,AURKB,UBE2C,PSRC1,CKS2,ECT2
GO Process	GO:0001934	Positive regulation of protein phosphorylation	10	747	0.67	0.51	0.0047	9606.ENSP00000265728,9606.ENSP00000300093,9606.ENSP00000300403,9606.ENSP00000311083,9606.ENSP00000313950,9606.ENSP00000358813,9606.ENSP00000358925,9606.ENSP00000362146,9606.ENSP00000364976,9606.ENSP00000376457	DBF4,PLK1,TPX2,CKS1B,AURKB,TTK,PSRC1,CDCA8,CKS2,ECT2
GO Process	GO:0008315	G2/MI transition of meiotic cell cycle	2	2	2.55	0.8	0.0047	9606.ENSP00000261597,9606.ENSP00000288207	NDC80,CCNB2
GO Process	GO:0051444	Negative regulation of ubiquitin-protein transferase activity	3	23	1.66	0.75	0.0054	9606.ENSP00000229758,9606.ENSP00000296509,9606.ENSP00000357858	FBXO5,MAD2L1,BUB3
GO Process	GO:0048522	Positive regulation of cellular process	30	5584	0.28	0.32	0.0065	9606.ENSP00000216911,9606.ENSP00000229758,9606.ENSP00000247191,9606.ENSP00000251496,9606.ENSP00000260363,9606.ENSP00000261597,9606.ENSP00000265728,9606.ENSP00000296417,9606.ENSP00000296503,9606.ENSP00000296509,9606.ENSP00000300093,9606.ENSP00000300403,9606.ENSP00000311083,9606.ENSP00000313950,9606.ENSP00000341382,9606.ENSP00000348838,9606.ENSP00000353770,9606.ENSP00000358813,9606.ENSP00000358925,…	AURKA,FBXO5,DLGAP5,NCAPG,KIF23,NDC80,DBF4,H2AZ1,HMGB2,MAD2L1,PLK1,TPX2,CKS1B,AURKB,SMC4,UBE2C,RRM2,TTK,PSRC1,CDCA8,CKS2,CKAP2,ECT2,PRC1,CDK1,TOP2A,PBK,CCNA2,FAM83D,NUSAP1
GO Process	GO:0051246	Regulation of protein metabolic process	19	2622	0.41	0.38	0.0069	9606.ENSP00000216911,9606.ENSP00000229758,9606.ENSP00000265728,9606.ENSP00000288207,9606.ENSP00000296509,9606.ENSP00000300093,9606.ENSP00000300403,9606.ENSP00000311083,9606.ENSP00000313950,9606.ENSP00000348838,9606.ENSP00000357858,9606.ENSP00000358813,9606.ENSP00000358925,9606.ENSP00000362146,9606.ENSP00000364976,9606.ENSP00000376457,9606.ENSP00000428489,9606.ENSP00000481380,9606.ENSP00000481465	AURKA,FBXO5,DBF4,CCNB2,MAD2L1,PLK1,TPX2,CKS1B,AURKB,UBE2C,BUB3,TTK,PSRC1,CDCA8,CKS2,ECT2,PBK,CCNA2,FAM83D
GO Process	GO:0070192	Chromosome organization involved in meiotic cell cycle	4	76	1.27	0.65	0.0076	9606.ENSP00000263753,9606.ENSP00000302530,9606.ENSP00000341382,9606.ENSP00000350447	SGO1,BUB1,SMC4,SGO2
GO Process	GO:0045859	Regulation of protein kinase activity	9	663	0.68	0.47	0.0101	9606.ENSP00000265728,9606.ENSP00000288207,9606.ENSP00000300093,9606.ENSP00000300403,9606.ENSP00000311083,9606.ENSP00000358925,9606.ENSP00000364976,9606.ENSP00000376457,9606.ENSP00000481380	DBF4,CCNB2,PLK1,TPX2,CKS1B,PSRC1,CKS2,ECT2,CCNA2
GO Process	GO:0071900	Regulation of protein serine/threonine kinase activity	7	386	0.8	0.5	0.0112	9606.ENSP00000265728,9606.ENSP00000288207,9606.ENSP00000300093,9606.ENSP00000311083,9606.ENSP00000358925,9606.ENSP00000364976,9606.ENSP00000481380	DBF4,CCNB2,PLK1,CKS1B,PSRC1,CKS2,CCNA2
GO Process	GO:0031401	Positive regulation of protein modification process	11	1018	0.58	0.42	0.0119	9606.ENSP00000265728,9606.ENSP00000300093,9606.ENSP00000300403,9606.ENSP00000311083,9606.ENSP00000313950,9606.ENSP00000348838,9606.ENSP00000358813,9606.ENSP00000358925,9606.ENSP00000362146,9606.ENSP00000364976,9606.ENSP00000376457	DBF4,PLK1,TPX2,CKS1B,AURKB,UBE2C,TTK,PSRC1,CDCA8,CKS2,ECT2
GO Process	GO:0009987	Cellular process	53	14826	0.1	0.24	0.0135	9606.ENSP00000160827,9606.ENSP00000216911,9606.ENSP00000229758,9606.ENSP00000242776,9606.ENSP00000247191,9606.ENSP00000249776,9606.ENSP00000250056,9606.ENSP00000251496,9606.ENSP00000260363,9606.ENSP00000260731,9606.ENSP00000261597,9606.ENSP00000263753,9606.ENSP00000265728,9606.ENSP00000271452,9606.ENSP00000282074,9606.ENSP00000288207,9606.ENSP00000296417,9606.ENSP00000296503,9606.ENSP00000296509,…	KIF22,AURKA,FBXO5,DDX39A,DLGAP5,KNSTRN,PIMREG,NCAPG,KIF23,KIF11,NDC80,SGO1,DBF4,NUF2,SPC25,CCNB2,H2AZ1,HMGB2,MAD2L1,PLK1,TPX2,BUB1,MIS18BP1,CKS1B,AURKB,TUBA1B,TUBB4B,SMC4,UBE2C,SGO2,RRM2,BUB3,TTK,PSRC1,KIF2C,CDCA8,ZWINT,CKS2,CKAP2,ECT2,PRC1,KIF20A,CDK1,TOP2A,HJURP,GTSE1,PBK,KPNA2,CDCA3,CCNA2,FAM83D,UBE2T,NUSAP1
GO Process	GO:0051642	Centrosome localization	3	33	1.5	0.61	0.0135	9606.ENSP00000216911,9606.ENSP00000247191,9606.ENSP00000296509	AURKA,DLGAP5,MAD2L1
GO Process	GO:0000132	Establishment of mitotic spindle orientation	3	34	1.49	0.6	0.0144	9606.ENSP00000261597,9606.ENSP00000296509,9606.ENSP00000300093	NDC80,MAD2L1,PLK1
GO Process	GO:0048144	Fibroblast proliferation	3	34	1.49	0.6	0.0144	9606.ENSP00000311083,9606.ENSP00000364976,9606.ENSP00000378699	CKS1B,CKS2,CDK1
GO Process	GO:0051754	Meiotic sister chromatid cohesion, centromeric	2	5	2.15	0.63	0.0148	9606.ENSP00000302530,9606.ENSP00000350447	BUB1,SGO2
GO Process	GO:1905821	Positive regulation of chromosome condensation	2	5	2.15	0.63	0.0148	9606.ENSP00000251496,9606.ENSP00000341382	NCAPG,SMC4
GO Process	GO:0048518	Positive regulation of biological process	31	6207	0.24	0.28	0.0171	9606.ENSP00000216911,9606.ENSP00000229758,9606.ENSP00000247191,9606.ENSP00000251496,9606.ENSP00000260363,9606.ENSP00000261597,9606.ENSP00000265728,9606.ENSP00000296417,9606.ENSP00000296503,9606.ENSP00000296509,9606.ENSP00000300093,9606.ENSP00000300403,9606.ENSP00000311083,9606.ENSP00000313950,9606.ENSP00000341382,9606.ENSP00000348838,9606.ENSP00000353770,9606.ENSP00000358813,9606.ENSP00000358925,…	AURKA,FBXO5,DLGAP5,NCAPG,KIF23,NDC80,DBF4,H2AZ1,HMGB2,MAD2L1,PLK1,TPX2,CKS1B,AURKB,SMC4,UBE2C,RRM2,TTK,PSRC1,CDCA8,CKS2,CKAP2,ECT2,PRC1,CDK1,TOP2A,PBK,KPNA2,CCNA2,FAM83D,NUSAP1
GO Process	GO:0072698	Protein localization to microtubule cytoskeleton	3	38	1.44	0.56	0.0189	9606.ENSP00000216911,9606.ENSP00000358813,9606.ENSP00000481465	AURKA,TTK,FAM83D
GO Process	GO:0007100	Mitotic centrosome separation	2	6	2.07	0.59	0.0193	9606.ENSP00000216911,9606.ENSP00000260731	AURKA,KIF11
GO Process	GO:0016321	Female meiosis chromosome segregation	2	6	2.07	0.59	0.0193	9606.ENSP00000300093,9606.ENSP00000358813	PLK1,TTK
GO Process	GO:0006468	Protein phosphorylation	9	736	0.63	0.4	0.0198	9606.ENSP00000216911,9606.ENSP00000300093,9606.ENSP00000302530,9606.ENSP00000313950,9606.ENSP00000358813,9606.ENSP00000362146,9606.ENSP00000378699,9606.ENSP00000428489,9606.ENSP00000481380	AURKA,PLK1,BUB1,AURKB,TTK,CDCA8,CDK1,PBK,CCNA2
GO Process	GO:1903490	Positive regulation of mitotic cytokinesis	2	7	2	0.55	0.0239	9606.ENSP00000313950,9606.ENSP00000362146	AURKB,CDCA8
GO Process	GO:0032147	Activation of protein kinase activity	5	203	0.94	0.45	0.0257	9606.ENSP00000265728,9606.ENSP00000300403,9606.ENSP00000311083,9606.ENSP00000364976,9606.ENSP00000376457	DBF4,TPX2,CKS1B,CKS2,ECT2
GO Process	GO:0051649	Establishment of localization in cell	14	1756	0.45	0.33	0.0271	9606.ENSP00000160827,9606.ENSP00000242776,9606.ENSP00000261597,9606.ENSP00000271452,9606.ENSP00000296509,9606.ENSP00000300093,9606.ENSP00000336799,9606.ENSP00000358925,9606.ENSP00000361298,9606.ENSP00000362146,9606.ENSP00000363055,9606.ENSP00000438483,9606.ENSP00000481465,9606.ENSP00000499238	KIF22,DDX39A,NDC80,NUF2,MAD2L1,PLK1,TUBA1B,PSRC1,KIF2C,CDCA8,ZWINT,KPNA2,FAM83D,NUSAP1
GO Process	GO:0045840	Positive regulation of mitotic nuclear division	3	45	1.37	0.5	0.0284	9606.ENSP00000216911,9606.ENSP00000247191,9606.ENSP00000499238	AURKA,DLGAP5,NUSAP1
GO Process	GO:0060236	Regulation of mitotic spindle organization	3	45	1.37	0.5	0.0284	9606.ENSP00000300093,9606.ENSP00000300403,9606.ENSP00000358925	PLK1,TPX2,PSRC1
GO Process	GO:1902425	Positive regulation of attachment of mitotic spindle microtubules to kinetochore	2	8	1.94	0.53	0.0287	9606.ENSP00000313950,9606.ENSP00000362146	AURKB,CDCA8
GO Process	GO:0022607	Cellular component assembly	17	2467	0.38	0.31	0.0289	9606.ENSP00000216911,9606.ENSP00000229758,9606.ENSP00000247191,9606.ENSP00000260363,9606.ENSP00000260731,9606.ENSP00000261597,9606.ENSP00000288207,9606.ENSP00000296503,9606.ENSP00000300403,9606.ENSP00000313950,9606.ENSP00000348838,9606.ENSP00000353770,9606.ENSP00000362146,9606.ENSP00000376457,9606.ENSP00000377793,9606.ENSP00000378699,9606.ENSP00000414109	AURKA,FBXO5,DLGAP5,KIF23,KIF11,NDC80,CCNB2,HMGB2,TPX2,AURKB,UBE2C,RRM2,CDCA8,ECT2,PRC1,CDK1,HJURP
GO Process	GO:0050794	Regulation of cellular process	44	11025	0.15	0.23	0.0291	9606.ENSP00000216911,9606.ENSP00000229758,9606.ENSP00000247191,9606.ENSP00000249776,9606.ENSP00000251496,9606.ENSP00000260363,9606.ENSP00000260731,9606.ENSP00000261597,9606.ENSP00000265728,9606.ENSP00000271452,9606.ENSP00000282074,9606.ENSP00000288207,9606.ENSP00000296417,9606.ENSP00000296503,9606.ENSP00000296509,9606.ENSP00000300093,9606.ENSP00000300403,9606.ENSP00000302530,9606.ENSP00000311083,…	AURKA,FBXO5,DLGAP5,KNSTRN,NCAPG,KIF23,KIF11,NDC80,DBF4,NUF2,SPC25,CCNB2,H2AZ1,HMGB2,MAD2L1,PLK1,TPX2,BUB1,CKS1B,AURKB,SMC4,UBE2C,RRM2,BUB3,TTK,PSRC1,KIF2C,CDCA8,ZWINT,CKS2,CKAP2,ECT2,PRC1,KIF20A,CDK1,MXD3,TOP2A,HJURP,GTSE1,PBK,KPNA2,CCNA2,FAM83D,NUSAP1
GO Process	GO:0016310	Phosphorylation	10	966	0.56	0.36	0.0296	9606.ENSP00000216911,9606.ENSP00000300093,9606.ENSP00000302530,9606.ENSP00000311083,9606.ENSP00000313950,9606.ENSP00000358813,9606.ENSP00000362146,9606.ENSP00000378699,9606.ENSP00000428489,9606.ENSP00000481380	AURKA,PLK1,BUB1,CKS1B,AURKB,TTK,CDCA8,CDK1,PBK,CCNA2
GO Process	GO:0031396	Regulation of protein ubiquitination	5	212	0.92	0.44	0.0296	9606.ENSP00000229758,9606.ENSP00000296509,9606.ENSP00000300093,9606.ENSP00000348838,9606.ENSP00000357858	FBXO5,MAD2L1,PLK1,UBE2C,BUB3
GO Process	GO:0045737	Positive regulation of cyclin-dependent protein serine/threonine kinase activity	3	47	1.35	0.49	0.0305	9606.ENSP00000311083,9606.ENSP00000358925,9606.ENSP00000364976	CKS1B,PSRC1,CKS2
GO Process	GO:0001578	Microtubule bundle formation	4	125	1.05	0.43	0.0382	9606.ENSP00000300093,9606.ENSP00000358925,9606.ENSP00000377793,9606.ENSP00000378356	PLK1,PSRC1,PRC1,KIF20A
GO Process	GO:0006265	DNA topological change	2	10	1.85	0.48	0.0397	9606.ENSP00000296503,9606.ENSP00000411532	HMGB2,TOP2A
GO Process	GO:0010638	Positive regulation of organelle organization	7	508	0.69	0.35	0.0464	9606.ENSP00000216911,9606.ENSP00000247191,9606.ENSP00000251496,9606.ENSP00000313950,9606.ENSP00000341382,9606.ENSP00000358925,9606.ENSP00000499238	AURKA,DLGAP5,NCAPG,AURKB,SMC4,PSRC1,NUSAP1
GO Process	GO:1904668	Positive regulation of ubiquitin protein ligase activity	2	11	1.81	0.45	0.0464	9606.ENSP00000300093,9606.ENSP00000348838	PLK1,UBE2C
GO Process	GO:0031109	Microtubule polymerization or depolymerization	3	56	1.28	0.43	0.0473	9606.ENSP00000229758,9606.ENSP00000300403,9606.ENSP00000361298	FBXO5,TPX2,KIF2C
GO Function	GO:0008017	Microtubule binding	14	269	1.26	2.08	1.86e-10	9606.ENSP00000160827,9606.ENSP00000247191,9606.ENSP00000249776,9606.ENSP00000260363,9606.ENSP00000260731,9606.ENSP00000300093,9606.ENSP00000300403,9606.ENSP00000358925,9606.ENSP00000361298,9606.ENSP00000377793,9606.ENSP00000378356,9606.ENSP00000415430,9606.ENSP00000481465,9606.ENSP00000499238	KIF22,DLGAP5,KNSTRN,KIF23,KIF11,PLK1,TPX2,PSRC1,KIF2C,PRC1,KIF20A,GTSE1,FAM83D,NUSAP1
GO Function	GO:0005515	Protein binding	41	7242	0.3	0.42	5.5e-05	9606.ENSP00000160827,9606.ENSP00000216911,9606.ENSP00000229758,9606.ENSP00000242776,9606.ENSP00000247191,9606.ENSP00000249776,9606.ENSP00000260363,9606.ENSP00000260731,9606.ENSP00000261597,9606.ENSP00000263753,9606.ENSP00000288207,9606.ENSP00000296417,9606.ENSP00000296503,9606.ENSP00000296509,9606.ENSP00000300093,9606.ENSP00000300403,9606.ENSP00000311083,9606.ENSP00000313950,9606.ENSP00000336799,…	KIF22,AURKA,FBXO5,DDX39A,DLGAP5,KNSTRN,KIF23,KIF11,NDC80,SGO1,CCNB2,H2AZ1,HMGB2,MAD2L1,PLK1,TPX2,CKS1B,AURKB,TUBA1B,TUBB4B,UBE2C,RRM2,BUB3,TTK,PSRC1,KIF2C,ZWINT,CKS2,ECT2,PRC1,KIF20A,CDK1,MXD3,TOP2A,HJURP,GTSE1,KPNA2,CCNA2,FAM83D,UBE2T,NUSAP1
GO Function	GO:0019900	Kinase binding	14	785	0.8	0.82	5.5e-05	9606.ENSP00000216911,9606.ENSP00000229758,9606.ENSP00000260731,9606.ENSP00000263753,9606.ENSP00000300093,9606.ENSP00000300403,9606.ENSP00000311083,9606.ENSP00000313950,9606.ENSP00000364976,9606.ENSP00000377793,9606.ENSP00000378356,9606.ENSP00000411532,9606.ENSP00000481380,9606.ENSP00000481465	AURKA,FBXO5,KIF11,SGO1,PLK1,TPX2,CKS1B,AURKB,CKS2,PRC1,KIF20A,TOP2A,CCNA2,FAM83D
GO Function	GO:0035639	Purine ribonucleoside triphosphate binding	19	1834	0.56	0.57	0.00038	9606.ENSP00000160827,9606.ENSP00000216911,9606.ENSP00000242776,9606.ENSP00000260363,9606.ENSP00000260731,9606.ENSP00000300093,9606.ENSP00000302530,9606.ENSP00000313950,9606.ENSP00000336799,9606.ENSP00000341289,9606.ENSP00000341382,9606.ENSP00000348838,9606.ENSP00000358813,9606.ENSP00000361298,9606.ENSP00000378356,9606.ENSP00000378699,9606.ENSP00000411532,9606.ENSP00000428489,9606.ENSP00000494957	KIF22,AURKA,DDX39A,KIF23,KIF11,PLK1,BUB1,AURKB,TUBA1B,TUBB4B,SMC4,UBE2C,TTK,KIF2C,KIF20A,CDK1,TOP2A,PBK,UBE2T
GO Function	GO:0005524	ATP binding	17	1491	0.6	0.59	0.00042	9606.ENSP00000160827,9606.ENSP00000216911,9606.ENSP00000242776,9606.ENSP00000260363,9606.ENSP00000260731,9606.ENSP00000300093,9606.ENSP00000302530,9606.ENSP00000313950,9606.ENSP00000341382,9606.ENSP00000348838,9606.ENSP00000358813,9606.ENSP00000361298,9606.ENSP00000378356,9606.ENSP00000378699,9606.ENSP00000411532,9606.ENSP00000428489,9606.ENSP00000494957	KIF22,AURKA,DDX39A,KIF23,KIF11,PLK1,BUB1,AURKB,SMC4,UBE2C,TTK,KIF2C,KIF20A,CDK1,TOP2A,PBK,UBE2T
GO Function	GO:0019901	Protein kinase binding	12	702	0.78	0.71	0.00042	9606.ENSP00000216911,9606.ENSP00000229758,9606.ENSP00000260731,9606.ENSP00000300093,9606.ENSP00000300403,9606.ENSP00000311083,9606.ENSP00000364976,9606.ENSP00000377793,9606.ENSP00000378356,9606.ENSP00000411532,9606.ENSP00000481380,9606.ENSP00000481465	AURKA,FBXO5,KIF11,PLK1,TPX2,CKS1B,CKS2,PRC1,KIF20A,TOP2A,CCNA2,FAM83D
GO Function	GO:0032555	Purine ribonucleotide binding	19	1903	0.55	0.55	0.00042	9606.ENSP00000160827,9606.ENSP00000216911,9606.ENSP00000242776,9606.ENSP00000260363,9606.ENSP00000260731,9606.ENSP00000300093,9606.ENSP00000302530,9606.ENSP00000313950,9606.ENSP00000336799,9606.ENSP00000341289,9606.ENSP00000341382,9606.ENSP00000348838,9606.ENSP00000358813,9606.ENSP00000361298,9606.ENSP00000378356,9606.ENSP00000378699,9606.ENSP00000411532,9606.ENSP00000428489,9606.ENSP00000494957	KIF22,AURKA,DDX39A,KIF23,KIF11,PLK1,BUB1,AURKB,TUBA1B,TUBB4B,SMC4,UBE2C,TTK,KIF2C,KIF20A,CDK1,TOP2A,PBK,UBE2T
GO Function	GO:0003777	Microtubule motor activity	5	68	1.41	0.96	0.0007	9606.ENSP00000160827,9606.ENSP00000260363,9606.ENSP00000260731,9606.ENSP00000361298,9606.ENSP00000378356	KIF22,KIF23,KIF11,KIF2C,KIF20A
GO Function	GO:0019899	Enzyme binding	19	2084	0.51	0.5	0.00087	9606.ENSP00000216911,9606.ENSP00000229758,9606.ENSP00000260731,9606.ENSP00000263753,9606.ENSP00000300093,9606.ENSP00000300403,9606.ENSP00000311083,9606.ENSP00000313950,9606.ENSP00000336799,9606.ENSP00000348838,9606.ENSP00000364976,9606.ENSP00000376457,9606.ENSP00000377793,9606.ENSP00000378356,9606.ENSP00000411532,9606.ENSP00000438483,9606.ENSP00000481380,9606.ENSP00000481465,9606.ENSP00000494957	AURKA,FBXO5,KIF11,SGO1,PLK1,TPX2,CKS1B,AURKB,TUBA1B,UBE2C,CKS2,ECT2,PRC1,KIF20A,TOP2A,KPNA2,CCNA2,FAM83D,UBE2T
GO Function	GO:0004712	Protein serine/threonine/tyrosine kinase activity	4	44	1.5	0.82	0.0027	9606.ENSP00000216911,9606.ENSP00000313950,9606.ENSP00000358813,9606.ENSP00000428489	AURKA,AURKB,TTK,PBK
GO Function	GO:0016538	Cyclin-dependent protein serine/threonine kinase regulator activity	4	48	1.47	0.78	0.0035	9606.ENSP00000288207,9606.ENSP00000311083,9606.ENSP00000364976,9606.ENSP00000481380	CCNB2,CKS1B,CKS2,CCNA2
GO Function	GO:0035173	Histone kinase activity	3	18	1.77	0.74	0.0059	9606.ENSP00000216911,9606.ENSP00000313950,9606.ENSP00000378699	AURKA,AURKB,CDK1
GO Function	GO:0019887	Protein kinase regulator activity	6	221	0.98	0.57	0.0085	9606.ENSP00000265728,9606.ENSP00000288207,9606.ENSP00000300403,9606.ENSP00000311083,9606.ENSP00000364976,9606.ENSP00000481380	DBF4,CCNB2,TPX2,CKS1B,CKS2,CCNA2
GO Function	GO:0106310	Protein serine kinase activity	7	361	0.83	0.48	0.0148	9606.ENSP00000216911,9606.ENSP00000300093,9606.ENSP00000302530,9606.ENSP00000313950,9606.ENSP00000358813,9606.ENSP00000378699,9606.ENSP00000428489	AURKA,PLK1,BUB1,AURKB,TTK,CDK1,PBK
GO Function	GO:0140657	ATP-dependent activity	8	543	0.71	0.4	0.0268	9606.ENSP00000160827,9606.ENSP00000242776,9606.ENSP00000260363,9606.ENSP00000260731,9606.ENSP00000341382,9606.ENSP00000361298,9606.ENSP00000378356,9606.ENSP00000411532	KIF22,DDX39A,KIF23,KIF11,SMC4,KIF2C,KIF20A,TOP2A
GO Function	GO:0043130	Ubiquitin binding	4	97	1.16	0.46	0.0328	9606.ENSP00000311083,9606.ENSP00000357858,9606.ENSP00000364976,9606.ENSP00000411532	CKS1B,BUB3,CKS2,TOP2A
GO Function	GO:0004674	Protein serine/threonine kinase activity	7	434	0.75	0.38	0.0391	9606.ENSP00000216911,9606.ENSP00000300093,9606.ENSP00000302530,9606.ENSP00000313950,9606.ENSP00000358813,9606.ENSP00000378699,9606.ENSP00000428489	AURKA,PLK1,BUB1,AURKB,TTK,CDK1,PBK
GO Component	GO:0005819	Spindle	25	425	1.32	3.44	2.66e-23	9606.ENSP00000160827,9606.ENSP00000216911,9606.ENSP00000229758,9606.ENSP00000247191,9606.ENSP00000249776,9606.ENSP00000260363,9606.ENSP00000260731,9606.ENSP00000263753,9606.ENSP00000296509,9606.ENSP00000300093,9606.ENSP00000300403,9606.ENSP00000305204,9606.ENSP00000313950,9606.ENSP00000341289,9606.ENSP00000358813,9606.ENSP00000358925,9606.ENSP00000361298,9606.ENSP00000362146,9606.ENSP00000367276,…	KIF22,AURKA,FBXO5,DLGAP5,KNSTRN,KIF23,KIF11,SGO1,MAD2L1,PLK1,TPX2,CKAP2L,AURKB,TUBB4B,TTK,PSRC1,KIF2C,CDCA8,CKAP2,ECT2,PRC1,KIF20A,CDK1,FAM83D,NUSAP1
GO Component	GO:0000775	Chromosome, centromeric region	21	252	1.47	4.01	3.67e-22	9606.ENSP00000160827,9606.ENSP00000249776,9606.ENSP00000251496,9606.ENSP00000261597,9606.ENSP00000263753,9606.ENSP00000271452,9606.ENSP00000282074,9606.ENSP00000296509,9606.ENSP00000300093,9606.ENSP00000302530,9606.ENSP00000309790,9606.ENSP00000313950,9606.ENSP00000341382,9606.ENSP00000350447,9606.ENSP00000357858,9606.ENSP00000358813,9606.ENSP00000361298,9606.ENSP00000362146,9606.ENSP00000363055,…	KIF22,KNSTRN,NCAPG,NDC80,SGO1,NUF2,SPC25,MAD2L1,PLK1,BUB1,MIS18BP1,AURKB,SMC4,SGO2,BUB3,TTK,KIF2C,CDCA8,ZWINT,TOP2A,HJURP
GO Component	GO:0098687	Chromosomal region	22	365	1.33	3.29	1.17e-20	9606.ENSP00000160827,9606.ENSP00000249776,9606.ENSP00000251496,9606.ENSP00000261597,9606.ENSP00000263753,9606.ENSP00000271452,9606.ENSP00000282074,9606.ENSP00000296509,9606.ENSP00000300093,9606.ENSP00000302530,9606.ENSP00000309790,9606.ENSP00000313950,9606.ENSP00000341382,9606.ENSP00000350447,9606.ENSP00000357858,9606.ENSP00000358813,9606.ENSP00000361298,9606.ENSP00000362146,9606.ENSP00000363055,…	KIF22,KNSTRN,NCAPG,NDC80,SGO1,NUF2,SPC25,MAD2L1,PLK1,BUB1,MIS18BP1,AURKB,SMC4,SGO2,BUB3,TTK,KIF2C,CDCA8,ZWINT,CDK1,TOP2A,HJURP
GO Component	GO:0000793	Condensed chromosome	20	275	1.41	3.57	3.95e-20	9606.ENSP00000160827,9606.ENSP00000249776,9606.ENSP00000251496,9606.ENSP00000261597,9606.ENSP00000263753,9606.ENSP00000271452,9606.ENSP00000282074,9606.ENSP00000296503,9606.ENSP00000296509,9606.ENSP00000300093,9606.ENSP00000302530,9606.ENSP00000313950,9606.ENSP00000341382,9606.ENSP00000350447,9606.ENSP00000357858,9606.ENSP00000358813,9606.ENSP00000361298,9606.ENSP00000363055,9606.ENSP00000411532,…	KIF22,KNSTRN,NCAPG,NDC80,SGO1,NUF2,SPC25,HMGB2,MAD2L1,PLK1,BUB1,AURKB,SMC4,SGO2,BUB3,TTK,KIF2C,ZWINT,TOP2A,HJURP
GO Component	GO:0000779	Condensed chromosome, centromeric region	17	175	1.53	3.88	8.64e-19	9606.ENSP00000160827,9606.ENSP00000249776,9606.ENSP00000251496,9606.ENSP00000261597,9606.ENSP00000263753,9606.ENSP00000271452,9606.ENSP00000282074,9606.ENSP00000296509,9606.ENSP00000300093,9606.ENSP00000302530,9606.ENSP00000313950,9606.ENSP00000350447,9606.ENSP00000357858,9606.ENSP00000358813,9606.ENSP00000361298,9606.ENSP00000363055,9606.ENSP00000414109	KIF22,KNSTRN,NCAPG,NDC80,SGO1,NUF2,SPC25,MAD2L1,PLK1,BUB1,AURKB,SGO2,BUB3,TTK,KIF2C,ZWINT,HJURP
GO Component	GO:0072686	Mitotic spindle	17	180	1.52	3.82	1.13e-18	9606.ENSP00000160827,9606.ENSP00000216911,9606.ENSP00000249776,9606.ENSP00000260363,9606.ENSP00000260731,9606.ENSP00000296509,9606.ENSP00000300093,9606.ENSP00000300403,9606.ENSP00000305204,9606.ENSP00000313950,9606.ENSP00000341289,9606.ENSP00000367276,9606.ENSP00000376457,9606.ENSP00000377793,9606.ENSP00000378699,9606.ENSP00000481465,9606.ENSP00000499238	KIF22,AURKA,KNSTRN,KIF23,KIF11,MAD2L1,PLK1,TPX2,CKAP2L,AURKB,TUBB4B,CKAP2,ECT2,PRC1,CDK1,FAM83D,NUSAP1
GO Component	GO:0000776	Kinetochore	16	165	1.53	3.72	1.11e-17	9606.ENSP00000160827,9606.ENSP00000249776,9606.ENSP00000261597,9606.ENSP00000263753,9606.ENSP00000271452,9606.ENSP00000282074,9606.ENSP00000296509,9606.ENSP00000300093,9606.ENSP00000302530,9606.ENSP00000313950,9606.ENSP00000350447,9606.ENSP00000357858,9606.ENSP00000358813,9606.ENSP00000361298,9606.ENSP00000363055,9606.ENSP00000414109	KIF22,KNSTRN,NDC80,SGO1,NUF2,SPC25,MAD2L1,PLK1,BUB1,AURKB,SGO2,BUB3,TTK,KIF2C,ZWINT,HJURP
GO Component	GO:0015630	Microtubule cytoskeleton	29	1355	0.88	1.6	7.41e-17	9606.ENSP00000160827,9606.ENSP00000216911,9606.ENSP00000229758,9606.ENSP00000247191,9606.ENSP00000249776,9606.ENSP00000260363,9606.ENSP00000260731,9606.ENSP00000261597,9606.ENSP00000263753,9606.ENSP00000288207,9606.ENSP00000296509,9606.ENSP00000300093,9606.ENSP00000300403,9606.ENSP00000305204,9606.ENSP00000313950,9606.ENSP00000336799,9606.ENSP00000341289,9606.ENSP00000358813,9606.ENSP00000358925,…	KIF22,AURKA,FBXO5,DLGAP5,KNSTRN,KIF23,KIF11,NDC80,SGO1,CCNB2,MAD2L1,PLK1,TPX2,CKAP2L,AURKB,TUBA1B,TUBB4B,TTK,PSRC1,KIF2C,CDCA8,CKAP2,ECT2,PRC1,KIF20A,CDK1,GTSE1,FAM83D,NUSAP1
GO Component	GO:0099080	Supramolecular complex	28	1366	0.86	1.51	1.12e-15	9606.ENSP00000160827,9606.ENSP00000216911,9606.ENSP00000249776,9606.ENSP00000260363,9606.ENSP00000260731,9606.ENSP00000261597,9606.ENSP00000263753,9606.ENSP00000271452,9606.ENSP00000282074,9606.ENSP00000296509,9606.ENSP00000300093,9606.ENSP00000300403,9606.ENSP00000302530,9606.ENSP00000313950,9606.ENSP00000336799,9606.ENSP00000341289,9606.ENSP00000350447,9606.ENSP00000357858,9606.ENSP00000358813,…	KIF22,AURKA,KNSTRN,KIF23,KIF11,NDC80,SGO1,NUF2,SPC25,MAD2L1,PLK1,TPX2,BUB1,AURKB,TUBA1B,TUBB4B,SGO2,BUB3,TTK,KIF2C,ZWINT,CKAP2,PRC1,KIF20A,CDK1,HJURP,GTSE1,NUSAP1
GO Component	GO:0043232	Intracellular non-membrane-bounded organelle	45	5191	0.48	0.76	1.12e-14	9606.ENSP00000160827,9606.ENSP00000216911,9606.ENSP00000229758,9606.ENSP00000247191,9606.ENSP00000249776,9606.ENSP00000250056,9606.ENSP00000251496,9606.ENSP00000260363,9606.ENSP00000260731,9606.ENSP00000261597,9606.ENSP00000263753,9606.ENSP00000271452,9606.ENSP00000282074,9606.ENSP00000288207,9606.ENSP00000296417,9606.ENSP00000296503,9606.ENSP00000296509,9606.ENSP00000300093,9606.ENSP00000300403,…	KIF22,AURKA,FBXO5,DLGAP5,KNSTRN,PIMREG,NCAPG,KIF23,KIF11,NDC80,SGO1,NUF2,SPC25,CCNB2,H2AZ1,HMGB2,MAD2L1,PLK1,TPX2,BUB1,CKAP2L,MIS18BP1,AURKB,TUBA1B,TUBB4B,SMC4,SGO2,BUB3,TTK,PSRC1,KIF2C,CDCA8,ZWINT,CKAP2,ECT2,PRC1,KIF20A,CDK1,MXD3,TOP2A,HJURP,GTSE1,FAM83D,UBE2T,NUSAP1
GO Component	GO:0000922	Spindle pole	14	169	1.46	3.09	1.46e-14	9606.ENSP00000216911,9606.ENSP00000247191,9606.ENSP00000249776,9606.ENSP00000260731,9606.ENSP00000263753,9606.ENSP00000296509,9606.ENSP00000300093,9606.ENSP00000300403,9606.ENSP00000305204,9606.ENSP00000313950,9606.ENSP00000358925,9606.ENSP00000367276,9606.ENSP00000377793,9606.ENSP00000481465	AURKA,DLGAP5,KNSTRN,KIF11,SGO1,MAD2L1,PLK1,TPX2,CKAP2L,AURKB,PSRC1,CKAP2,PRC1,FAM83D
GO Component	GO:0005634	Nucleus	49	7672	0.35	0.57	1.18e-11	9606.ENSP00000160827,9606.ENSP00000216911,9606.ENSP00000229758,9606.ENSP00000242776,9606.ENSP00000247191,9606.ENSP00000249776,9606.ENSP00000250056,9606.ENSP00000251496,9606.ENSP00000260363,9606.ENSP00000260731,9606.ENSP00000261597,9606.ENSP00000263753,9606.ENSP00000265728,9606.ENSP00000271452,9606.ENSP00000282074,9606.ENSP00000288207,9606.ENSP00000296417,9606.ENSP00000296503,9606.ENSP00000296509,…	KIF22,AURKA,FBXO5,DDX39A,DLGAP5,KNSTRN,PIMREG,NCAPG,KIF23,KIF11,NDC80,SGO1,DBF4,NUF2,SPC25,CCNB2,H2AZ1,HMGB2,MAD2L1,PLK1,TPX2,BUB1,MIS18BP1,CKS1B,AURKB,TUBB4B,SMC4,UBE2C,SGO2,RRM2,BUB3,TTK,PSRC1,KIF2C,CDCA8,ZWINT,ECT2,PRC1,KIF20A,CDK1,MXD3,TOP2A,HJURP,GTSE1,PBK,KPNA2,CCNA2,UBE2T,NUSAP1
GO Component	GO:0005694	Chromosome	27	1850	0.71	1.08	1.47e-11	9606.ENSP00000160827,9606.ENSP00000249776,9606.ENSP00000251496,9606.ENSP00000261597,9606.ENSP00000263753,9606.ENSP00000271452,9606.ENSP00000282074,9606.ENSP00000296417,9606.ENSP00000296503,9606.ENSP00000296509,9606.ENSP00000300093,9606.ENSP00000302530,9606.ENSP00000309790,9606.ENSP00000313950,9606.ENSP00000341382,9606.ENSP00000350447,9606.ENSP00000357858,9606.ENSP00000358813,9606.ENSP00000361298,…	KIF22,KNSTRN,NCAPG,NDC80,SGO1,NUF2,SPC25,H2AZ1,HMGB2,MAD2L1,PLK1,BUB1,MIS18BP1,AURKB,SMC4,SGO2,BUB3,TTK,KIF2C,CDCA8,ZWINT,PRC1,CDK1,MXD3,TOP2A,HJURP,NUSAP1
GO Component	GO:0005874	Microtubule	16	453	1.09	1.85	1.88e-11	9606.ENSP00000160827,9606.ENSP00000216911,9606.ENSP00000249776,9606.ENSP00000260363,9606.ENSP00000260731,9606.ENSP00000300403,9606.ENSP00000313950,9606.ENSP00000336799,9606.ENSP00000341289,9606.ENSP00000361298,9606.ENSP00000367276,9606.ENSP00000377793,9606.ENSP00000378356,9606.ENSP00000378699,9606.ENSP00000415430,9606.ENSP00000499238	KIF22,AURKA,KNSTRN,KIF23,KIF11,TPX2,AURKB,TUBA1B,TUBB4B,KIF2C,CKAP2,PRC1,KIF20A,CDK1,GTSE1,NUSAP1
GO Component	GO:0031981	Nuclear lumen	37	4526	0.46	0.67	1.07e-09	9606.ENSP00000160827,9606.ENSP00000216911,9606.ENSP00000229758,9606.ENSP00000242776,9606.ENSP00000250056,9606.ENSP00000251496,9606.ENSP00000260363,9606.ENSP00000261597,9606.ENSP00000263753,9606.ENSP00000265728,9606.ENSP00000271452,9606.ENSP00000296503,9606.ENSP00000296509,9606.ENSP00000300093,9606.ENSP00000300403,9606.ENSP00000302530,9606.ENSP00000309790,9606.ENSP00000311083,9606.ENSP00000313950,…	KIF22,AURKA,FBXO5,DDX39A,PIMREG,NCAPG,KIF23,NDC80,SGO1,DBF4,NUF2,HMGB2,MAD2L1,PLK1,TPX2,BUB1,MIS18BP1,CKS1B,AURKB,SMC4,UBE2C,SGO2,BUB3,PSRC1,CDCA8,ZWINT,ECT2,PRC1,KIF20A,CDK1,TOP2A,HJURP,GTSE1,KPNA2,CCNA2,UBE2T,NUSAP1
GO Component	GO:0005654	Nucleoplasm	35	4169	0.47	0.67	3.32e-09	9606.ENSP00000160827,9606.ENSP00000216911,9606.ENSP00000229758,9606.ENSP00000242776,9606.ENSP00000250056,9606.ENSP00000260363,9606.ENSP00000261597,9606.ENSP00000263753,9606.ENSP00000265728,9606.ENSP00000271452,9606.ENSP00000296503,9606.ENSP00000296509,9606.ENSP00000300093,9606.ENSP00000300403,9606.ENSP00000302530,9606.ENSP00000309790,9606.ENSP00000311083,9606.ENSP00000313950,9606.ENSP00000341382,…	KIF22,AURKA,FBXO5,DDX39A,PIMREG,KIF23,NDC80,SGO1,DBF4,NUF2,HMGB2,MAD2L1,PLK1,TPX2,BUB1,MIS18BP1,CKS1B,AURKB,SMC4,UBE2C,SGO2,BUB3,PSRC1,CDCA8,ZWINT,ECT2,PRC1,KIF20A,CDK1,TOP2A,HJURP,GTSE1,KPNA2,CCNA2,UBE2T
GO Component	GO:0030496	Midbody	10	201	1.24	1.72	3.71e-08	9606.ENSP00000216911,9606.ENSP00000260363,9606.ENSP00000300093,9606.ENSP00000313950,9606.ENSP00000358925,9606.ENSP00000362146,9606.ENSP00000376457,9606.ENSP00000377793,9606.ENSP00000378356,9606.ENSP00000378699	AURKA,KIF23,PLK1,AURKB,PSRC1,CDCA8,ECT2,PRC1,KIF20A,CDK1
GO Component	GO:0070013	Intracellular organelle lumen	38	5660	0.37	0.54	1.59e-07	9606.ENSP00000160827,9606.ENSP00000216911,9606.ENSP00000229758,9606.ENSP00000242776,9606.ENSP00000250056,9606.ENSP00000251496,9606.ENSP00000260363,9606.ENSP00000261597,9606.ENSP00000263753,9606.ENSP00000265728,9606.ENSP00000271452,9606.ENSP00000296503,9606.ENSP00000296509,9606.ENSP00000300093,9606.ENSP00000300403,9606.ENSP00000302530,9606.ENSP00000309790,9606.ENSP00000311083,9606.ENSP00000313950,…	KIF22,AURKA,FBXO5,DDX39A,PIMREG,NCAPG,KIF23,NDC80,SGO1,DBF4,NUF2,HMGB2,MAD2L1,PLK1,TPX2,BUB1,MIS18BP1,CKS1B,AURKB,TUBB4B,SMC4,UBE2C,SGO2,BUB3,PSRC1,CDCA8,ZWINT,ECT2,PRC1,KIF20A,CDK1,TOP2A,HJURP,GTSE1,KPNA2,CCNA2,UBE2T,NUSAP1
GO Component	GO:0005829	Cytosol	36	5438	0.37	0.52	1.04e-06	9606.ENSP00000160827,9606.ENSP00000216911,9606.ENSP00000229758,9606.ENSP00000247191,9606.ENSP00000251496,9606.ENSP00000260363,9606.ENSP00000260731,9606.ENSP00000261597,9606.ENSP00000263753,9606.ENSP00000271452,9606.ENSP00000282074,9606.ENSP00000288207,9606.ENSP00000296509,9606.ENSP00000300093,9606.ENSP00000300403,9606.ENSP00000302530,9606.ENSP00000305204,9606.ENSP00000313950,9606.ENSP00000341289,…	KIF22,AURKA,FBXO5,DLGAP5,NCAPG,KIF23,KIF11,NDC80,SGO1,NUF2,SPC25,CCNB2,MAD2L1,PLK1,TPX2,BUB1,CKAP2L,AURKB,TUBB4B,SMC4,UBE2C,SGO2,RRM2,BUB3,PSRC1,KIF2C,CDCA8,ZWINT,ECT2,PRC1,CDK1,GTSE1,KPNA2,CDCA3,CCNA2,FAM83D
GO Component	GO:0005813	Centrosome	13	609	0.88	1.07	1.13e-06	9606.ENSP00000216911,9606.ENSP00000247191,9606.ENSP00000249776,9606.ENSP00000260363,9606.ENSP00000261597,9606.ENSP00000263753,9606.ENSP00000288207,9606.ENSP00000300093,9606.ENSP00000305204,9606.ENSP00000313950,9606.ENSP00000361298,9606.ENSP00000367276,9606.ENSP00000378699	AURKA,DLGAP5,KNSTRN,KIF23,NDC80,SGO1,CCNB2,PLK1,CKAP2L,AURKB,KIF2C,CKAP2,CDK1
GO Component	GO:0005875	Microtubule associated complex	8	168	1.22	1.4	2.44e-06	9606.ENSP00000160827,9606.ENSP00000216911,9606.ENSP00000260363,9606.ENSP00000260731,9606.ENSP00000313950,9606.ENSP00000361298,9606.ENSP00000362146,9606.ENSP00000378356	KIF22,AURKA,KIF23,KIF11,AURKB,KIF2C,CDCA8,KIF20A
GO Component	GO:0031617	NMS complex	4	10	2.15	1.8	4.01e-06	9606.ENSP00000261597,9606.ENSP00000271452,9606.ENSP00000282074,9606.ENSP00000363055	NDC80,NUF2,SPC25,ZWINT
GO Component	GO:0051233	Spindle midzone	5	36	1.69	1.59	7.21e-06	9606.ENSP00000216911,9606.ENSP00000300093,9606.ENSP00000313950,9606.ENSP00000362146,9606.ENSP00000377793	AURKA,PLK1,AURKB,CDCA8,PRC1
GO Component	GO:0044815	DNA packaging complex	8	208	1.13	1.21	1.07e-05	9606.ENSP00000251496,9606.ENSP00000261597,9606.ENSP00000271452,9606.ENSP00000282074,9606.ENSP00000296417,9606.ENSP00000341382,9606.ENSP00000350447,9606.ENSP00000363055	NCAPG,NDC80,NUF2,SPC25,H2AZ1,SMC4,SGO2,ZWINT
GO Component	GO:0045171	Intercellular bridge	6	91	1.37	1.32	2.04e-05	9606.ENSP00000300403,9606.ENSP00000341289,9606.ENSP00000362146,9606.ENSP00000377793,9606.ENSP00000378356,9606.ENSP00000481465	TPX2,TUBB4B,CDCA8,PRC1,KIF20A,FAM83D
GO Component	GO:0005871	Kinesin complex	5	50	1.55	1.37	2.87e-05	9606.ENSP00000160827,9606.ENSP00000260363,9606.ENSP00000260731,9606.ENSP00000361298,9606.ENSP00000378356	KIF22,KIF23,KIF11,KIF2C,KIF20A
GO Component	GO:0000307	Cyclin-dependent protein kinase holoenzyme complex	5	51	1.54	1.36	3.05e-05	9606.ENSP00000288207,9606.ENSP00000311083,9606.ENSP00000364976,9606.ENSP00000378699,9606.ENSP00000481380	CCNB2,CKS1B,CKS2,CDK1,CCNA2
GO Component	GO:0031262	Ndc80 complex	3	4	2.42	1.49	4.26e-05	9606.ENSP00000261597,9606.ENSP00000271452,9606.ENSP00000282074	NDC80,NUF2,SPC25
GO Component	GO:0043229	Intracellular organelle	53	13231	0.15	0.33	4.32e-05	9606.ENSP00000160827,9606.ENSP00000216911,9606.ENSP00000229758,9606.ENSP00000242776,9606.ENSP00000247191,9606.ENSP00000249776,9606.ENSP00000250056,9606.ENSP00000251496,9606.ENSP00000260363,9606.ENSP00000260731,9606.ENSP00000261597,9606.ENSP00000263753,9606.ENSP00000265728,9606.ENSP00000271452,9606.ENSP00000282074,9606.ENSP00000288207,9606.ENSP00000296417,9606.ENSP00000296503,9606.ENSP00000296509,…	KIF22,AURKA,FBXO5,DDX39A,DLGAP5,KNSTRN,PIMREG,NCAPG,KIF23,KIF11,NDC80,SGO1,DBF4,NUF2,SPC25,CCNB2,H2AZ1,HMGB2,MAD2L1,PLK1,TPX2,BUB1,CKAP2L,MIS18BP1,CKS1B,AURKB,TUBA1B,TUBB4B,SMC4,UBE2C,SGO2,RRM2,BUB3,TTK,PSRC1,KIF2C,CDCA8,ZWINT,CKAP2,ECT2,PRC1,KIF20A,CDK1,MXD3,TOP2A,HJURP,GTSE1,PBK,KPNA2,CCNA2,FAM83D,UBE2T,NUSAP1
GO Component	GO:0032133	Chromosome passenger complex	3	6	2.25	1.36	9.65e-05	9606.ENSP00000216911,9606.ENSP00000313950,9606.ENSP00000362146	AURKA,AURKB,CDCA8
GO Component	GO:0032991	Protein-containing complex	32	5506	0.31	0.41	0.00024	9606.ENSP00000160827,9606.ENSP00000216911,9606.ENSP00000251496,9606.ENSP00000260363,9606.ENSP00000260731,9606.ENSP00000261597,9606.ENSP00000265728,9606.ENSP00000271452,9606.ENSP00000282074,9606.ENSP00000288207,9606.ENSP00000296417,9606.ENSP00000296503,9606.ENSP00000296509,9606.ENSP00000300093,9606.ENSP00000311083,9606.ENSP00000313950,9606.ENSP00000341382,9606.ENSP00000348838,9606.ENSP00000350447,…	KIF22,AURKA,NCAPG,KIF23,KIF11,NDC80,DBF4,NUF2,SPC25,CCNB2,H2AZ1,HMGB2,MAD2L1,PLK1,CKS1B,AURKB,SMC4,UBE2C,SGO2,RRM2,BUB3,KIF2C,CDCA8,ZWINT,CKS2,ECT2,KIF20A,CDK1,MXD3,TOP2A,KPNA2,CCNA2
GO Component	GO:0097431	Mitotic spindle pole	4	36	1.59	1.13	0.00025	9606.ENSP00000216911,9606.ENSP00000300093,9606.ENSP00000313950,9606.ENSP00000481465	AURKA,PLK1,AURKB,FAM83D
GO Component	GO:0031616	Spindle pole centrosome	3	12	1.94	1.1	0.00048	9606.ENSP00000216911,9606.ENSP00000247191,9606.ENSP00000313950	AURKA,DLGAP5,AURKB
GO Component	GO:0005622	Intracellular anatomical structure	54	14891	0.11	0.27	0.0013	9606.ENSP00000160827,9606.ENSP00000216911,9606.ENSP00000229758,9606.ENSP00000242776,9606.ENSP00000247191,9606.ENSP00000249776,9606.ENSP00000250056,9606.ENSP00000251496,9606.ENSP00000260363,9606.ENSP00000260731,9606.ENSP00000261597,9606.ENSP00000263753,9606.ENSP00000265728,9606.ENSP00000271452,9606.ENSP00000282074,9606.ENSP00000288207,9606.ENSP00000296417,9606.ENSP00000296503,9606.ENSP00000296509,…	KIF22,AURKA,FBXO5,DDX39A,DLGAP5,KNSTRN,PIMREG,NCAPG,KIF23,KIF11,NDC80,SGO1,DBF4,NUF2,SPC25,CCNB2,H2AZ1,HMGB2,MAD2L1,PLK1,TPX2,BUB1,CKAP2L,MIS18BP1,CKS1B,AURKB,TUBA1B,TUBB4B,SMC4,UBE2C,SGO2,RRM2,BUB3,TTK,PSRC1,KIF2C,CDCA8,ZWINT,CKAP2,ECT2,PRC1,KIF20A,CDK1,MXD3,TOP2A,HJURP,GTSE1,PBK,KPNA2,CDCA3,CCNA2,FAM83D,UBE2T,NUSAP1
GO Component	GO:0097149	Centralspindlin complex	2	3	2.37	0.85	0.0034	9606.ENSP00000260363,9606.ENSP00000376457	KIF23,ECT2
GO Component	GO:0033597	Mitotic checkpoint complex	2	4	2.25	0.79	0.005	9606.ENSP00000296509,9606.ENSP00000357858	MAD2L1,BUB3
GO Component	GO:0043203	Axon hillock	2	7	2	0.66	0.0117	9606.ENSP00000216911,9606.ENSP00000300403	AURKA,TPX2
GO Component	GO:0000796	Condensin complex	2	8	1.94	0.63	0.0143	9606.ENSP00000251496,9606.ENSP00000341382	NCAPG,SMC4
GO Component	GO:0005737	Cytoplasm	46	12056	0.13	0.23	0.0251	9606.ENSP00000160827,9606.ENSP00000216911,9606.ENSP00000229758,9606.ENSP00000242776,9606.ENSP00000247191,9606.ENSP00000249776,9606.ENSP00000251496,9606.ENSP00000260363,9606.ENSP00000260731,9606.ENSP00000261597,9606.ENSP00000263753,9606.ENSP00000271452,9606.ENSP00000282074,9606.ENSP00000288207,9606.ENSP00000296503,9606.ENSP00000296509,9606.ENSP00000300093,9606.ENSP00000300403,9606.ENSP00000302530,…	KIF22,AURKA,FBXO5,DDX39A,DLGAP5,KNSTRN,NCAPG,KIF23,KIF11,NDC80,SGO1,NUF2,SPC25,CCNB2,HMGB2,MAD2L1,PLK1,TPX2,BUB1,CKAP2L,AURKB,TUBA1B,TUBB4B,SMC4,UBE2C,SGO2,RRM2,BUB3,TTK,PSRC1,KIF2C,CDCA8,ZWINT,CKAP2,ECT2,PRC1,KIF20A,CDK1,TOP2A,HJURP,GTSE1,KPNA2,CDCA3,CCNA2,FAM83D,NUSAP1
GO Component	GO:0000940	Outer kinetochore	2	12	1.77	0.53	0.0271	9606.ENSP00000261597,9606.ENSP00000300093	NDC80,PLK1
GO Component	GO:0010369	Chromocenter	2	14	1.7	0.49	0.035	9606.ENSP00000313950,9606.ENSP00000362146	AURKB,CDCA8
GO Component	GO:1990023	Mitotic spindle midzone	2	14	1.7	0.49	0.035	9606.ENSP00000313950,9606.ENSP00000377793	AURKB,PRC1
GO Component	GO:0045120	Pronucleus	2	15	1.67	0.48	0.0382	9606.ENSP00000216911,9606.ENSP00000481380	AURKA,CCNA2
GO Component	GO:0072687	Meiotic spindle	2	15	1.67	0.48	0.0382	9606.ENSP00000216911,9606.ENSP00000229758	AURKA,FBXO5
STRING clusters	CL:6596	Mixed, incl. Mitotic Spindle Checkpoint, and Mitotic sister chromatid segregation	35	151	1.91	10.52	2.16e-54	9606.ENSP00000216911,9606.ENSP00000229758,9606.ENSP00000247191,9606.ENSP00000249776,9606.ENSP00000250056,9606.ENSP00000251496,9606.ENSP00000260363,9606.ENSP00000260731,9606.ENSP00000261597,9606.ENSP00000271452,9606.ENSP00000282074,9606.ENSP00000288207,9606.ENSP00000296509,9606.ENSP00000300093,9606.ENSP00000300403,9606.ENSP00000302530,9606.ENSP00000305204,9606.ENSP00000309790,9606.ENSP00000313950,…	AURKA,FBXO5,DLGAP5,KNSTRN,PIMREG,NCAPG,KIF23,KIF11,NDC80,NUF2,SPC25,CCNB2,MAD2L1,PLK1,TPX2,BUB1,CKAP2L,MIS18BP1,AURKB,SMC4,UBE2C,BUB3,TTK,KIF2C,CDCA8,ZWINT,CKAP2,ECT2,PRC1,KIF20A,TOP2A,HJURP,PBK,FAM83D,NUSAP1
STRING clusters	CL:6604	Mixed, incl. Amplification of signal from the kinetochores, and Condensin complex	31	93	2.07	11.74	1.03e-51	9606.ENSP00000216911,9606.ENSP00000247191,9606.ENSP00000249776,9606.ENSP00000250056,9606.ENSP00000251496,9606.ENSP00000260363,9606.ENSP00000260731,9606.ENSP00000261597,9606.ENSP00000271452,9606.ENSP00000282074,9606.ENSP00000288207,9606.ENSP00000300093,9606.ENSP00000300403,9606.ENSP00000302530,9606.ENSP00000305204,9606.ENSP00000309790,9606.ENSP00000313950,9606.ENSP00000341382,9606.ENSP00000358813,…	AURKA,DLGAP5,KNSTRN,PIMREG,NCAPG,KIF23,KIF11,NDC80,NUF2,SPC25,CCNB2,PLK1,TPX2,BUB1,CKAP2L,MIS18BP1,AURKB,SMC4,TTK,KIF2C,CDCA8,ZWINT,CKAP2,ECT2,PRC1,KIF20A,TOP2A,HJURP,PBK,FAM83D,NUSAP1
STRING clusters	CL:6606	Mitotic sister chromatid segregation, and Mitotic spindle checkpoint signaling	24	61	2.14	10.36	1.36e-40	9606.ENSP00000216911,9606.ENSP00000247191,9606.ENSP00000249776,9606.ENSP00000251496,9606.ENSP00000260363,9606.ENSP00000260731,9606.ENSP00000288207,9606.ENSP00000300093,9606.ENSP00000300403,9606.ENSP00000302530,9606.ENSP00000305204,9606.ENSP00000313950,9606.ENSP00000341382,9606.ENSP00000358813,9606.ENSP00000361298,9606.ENSP00000362146,9606.ENSP00000367276,9606.ENSP00000376457,9606.ENSP00000377793,…	AURKA,DLGAP5,KNSTRN,NCAPG,KIF23,KIF11,CCNB2,PLK1,TPX2,BUB1,CKAP2L,AURKB,SMC4,TTK,KIF2C,CDCA8,CKAP2,ECT2,PRC1,KIF20A,TOP2A,PBK,FAM83D,NUSAP1
STRING clusters	CL:6608	Mixed, incl. Regulation of mitotic sister chromatid segregation, and Kinesin motor domain, conserved site	21	51	2.16	9.42	1.99e-35	9606.ENSP00000216911,9606.ENSP00000247191,9606.ENSP00000249776,9606.ENSP00000260363,9606.ENSP00000260731,9606.ENSP00000288207,9606.ENSP00000300093,9606.ENSP00000300403,9606.ENSP00000302530,9606.ENSP00000305204,9606.ENSP00000313950,9606.ENSP00000358813,9606.ENSP00000361298,9606.ENSP00000362146,9606.ENSP00000376457,9606.ENSP00000377793,9606.ENSP00000378356,9606.ENSP00000411532,9606.ENSP00000428489,…	AURKA,DLGAP5,KNSTRN,KIF23,KIF11,CCNB2,PLK1,TPX2,BUB1,CKAP2L,AURKB,TTK,KIF2C,CDCA8,ECT2,PRC1,KIF20A,TOP2A,PBK,FAM83D,NUSAP1
STRING clusters	CL:6610	Mixed, incl. Spindle elongation, and Polo-like kinase mediated events	19	41	2.21	9.01	1.37e-32	9606.ENSP00000216911,9606.ENSP00000247191,9606.ENSP00000249776,9606.ENSP00000260363,9606.ENSP00000260731,9606.ENSP00000288207,9606.ENSP00000300093,9606.ENSP00000300403,9606.ENSP00000305204,9606.ENSP00000313950,9606.ENSP00000361298,9606.ENSP00000362146,9606.ENSP00000376457,9606.ENSP00000377793,9606.ENSP00000378356,9606.ENSP00000411532,9606.ENSP00000428489,9606.ENSP00000481465,9606.ENSP00000499238	AURKA,DLGAP5,KNSTRN,KIF23,KIF11,CCNB2,PLK1,TPX2,CKAP2L,AURKB,KIF2C,CDCA8,ECT2,PRC1,KIF20A,TOP2A,PBK,FAM83D,NUSAP1
STRING clusters	CL:6614	Mixed, incl. Spindle elongation, and Polo-like kinase mediated events	17	35	2.23	8.28	3.45e-29	9606.ENSP00000216911,9606.ENSP00000247191,9606.ENSP00000260363,9606.ENSP00000260731,9606.ENSP00000288207,9606.ENSP00000300093,9606.ENSP00000300403,9606.ENSP00000305204,9606.ENSP00000313950,9606.ENSP00000361298,9606.ENSP00000362146,9606.ENSP00000376457,9606.ENSP00000377793,9606.ENSP00000378356,9606.ENSP00000411532,9606.ENSP00000428489,9606.ENSP00000499238	AURKA,DLGAP5,KIF23,KIF11,CCNB2,PLK1,TPX2,CKAP2L,AURKB,KIF2C,CDCA8,ECT2,PRC1,KIF20A,TOP2A,PBK,NUSAP1
STRING clusters	CL:6617	Mixed, incl. Spindle elongation, and Polo-like kinase mediated events	16	30	2.27	8.07	6.98e-28	9606.ENSP00000216911,9606.ENSP00000247191,9606.ENSP00000260363,9606.ENSP00000260731,9606.ENSP00000288207,9606.ENSP00000300093,9606.ENSP00000300403,9606.ENSP00000313950,9606.ENSP00000361298,9606.ENSP00000362146,9606.ENSP00000376457,9606.ENSP00000377793,9606.ENSP00000378356,9606.ENSP00000411532,9606.ENSP00000428489,9606.ENSP00000499238	AURKA,DLGAP5,KIF23,KIF11,CCNB2,PLK1,TPX2,AURKB,KIF2C,CDCA8,ECT2,PRC1,KIF20A,TOP2A,PBK,NUSAP1
STRING clusters	CL:6619	Mixed, incl. Spindle elongation, and Outer kinetochore	14	24	2.31	7.3	1.41e-24	9606.ENSP00000216911,9606.ENSP00000247191,9606.ENSP00000260731,9606.ENSP00000288207,9606.ENSP00000300093,9606.ENSP00000300403,9606.ENSP00000313950,9606.ENSP00000361298,9606.ENSP00000362146,9606.ENSP00000377793,9606.ENSP00000378356,9606.ENSP00000411532,9606.ENSP00000428489,9606.ENSP00000499238	AURKA,DLGAP5,KIF11,CCNB2,PLK1,TPX2,AURKB,KIF2C,CDCA8,PRC1,KIF20A,TOP2A,PBK,NUSAP1
STRING clusters	CL:6620	Mixed, incl. Spindle elongation, and Axon hillock	8	12	2.37	4.22	1.16e-13	9606.ENSP00000216911,9606.ENSP00000247191,9606.ENSP00000260731,9606.ENSP00000300403,9606.ENSP00000377793,9606.ENSP00000411532,9606.ENSP00000428489,9606.ENSP00000499238	AURKA,DLGAP5,KIF11,TPX2,PRC1,TOP2A,PBK,NUSAP1
STRING clusters	CL:6643	Chromosome passenger complex, and Outer kinetochore	6	12	2.25	2.83	2.51e-09	9606.ENSP00000288207,9606.ENSP00000300093,9606.ENSP00000313950,9606.ENSP00000361298,9606.ENSP00000362146,9606.ENSP00000378356	CCNB2,PLK1,AURKB,KIF2C,CDCA8,KIF20A
STRING clusters	CL:6622	Mixed, incl. Mitotic centrosome separation, and Nuclear microtubule	5	7	2.4	2.49	3.89e-08	9606.ENSP00000216911,9606.ENSP00000247191,9606.ENSP00000260731,9606.ENSP00000300403,9606.ENSP00000428489	AURKA,DLGAP5,KIF11,TPX2,PBK
STRING clusters	CL:6728	Centromere complex assembly, and NMS complex	6	31	1.83	2.06	2.61e-07	9606.ENSP00000261597,9606.ENSP00000271452,9606.ENSP00000282074,9606.ENSP00000309790,9606.ENSP00000363055,9606.ENSP00000414109	NDC80,NUF2,SPC25,MIS18BP1,ZWINT,HJURP
STRING clusters	CL:6946	Cyclin-dependent kinase, regulatory subunit, and Phosphorylation of proteins involved in the G2/M transition by Cyclin A:Cdc2 complexes	4	5	2.45	1.93	2.06e-06	9606.ENSP00000311083,9606.ENSP00000364976,9606.ENSP00000378699,9606.ENSP00000481380	CKS1B,CKS2,CDK1,CCNA2
STRING clusters	CL:6657	Chromosome passenger complex	3	5	2.32	1.19	0.00032	9606.ENSP00000313950,9606.ENSP00000362146,9606.ENSP00000378356	AURKB,CDCA8,KIF20A
STRING clusters	CL:6839	Conversion from APC/C:Cdc20 to APC/C:Cdh1 in late anaphase, and Regulation of sister chromatid separation at the metaphase-anaphase transition	4	29	1.69	1.05	0.00054	9606.ENSP00000229758,9606.ENSP00000296509,9606.ENSP00000348838,9606.ENSP00000357858	FBXO5,MAD2L1,UBE2C,BUB3
STRING clusters	CL:6644	Mixed, incl. Activation of NIMA Kinases NEK9, NEK6, NEK7, and Mad3/Bub1 homology region 1	3	7	2.18	1.1	0.00058	9606.ENSP00000288207,9606.ENSP00000300093,9606.ENSP00000361298	CCNB2,PLK1,KIF2C
STRING clusters	CL:6842	Anaphase-promoting complex, and Securin sister-chromatid separation inhibitor	3	23	1.66	0.66	0.0098	9606.ENSP00000229758,9606.ENSP00000296509,9606.ENSP00000348838	FBXO5,MAD2L1,UBE2C
STRING clusters	CL:6695	RZZ complex, and Kinetochore binding	2	5	2.15	0.53	0.0289	9606.ENSP00000302530,9606.ENSP00000358813	BUB1,TTK
STRING clusters	CL:6713	Positive regulation of chromosome condensation	2	5	2.15	0.53	0.0289	9606.ENSP00000251496,9606.ENSP00000341382	NCAPG,SMC4
KEGG	hsa04110	Cell cycle	9	120	1.42	1.95	3.2e-08	9606.ENSP00000265728,9606.ENSP00000288207,9606.ENSP00000296509,9606.ENSP00000300093,9606.ENSP00000302530,9606.ENSP00000357858,9606.ENSP00000358813,9606.ENSP00000378699,9606.ENSP00000481380	DBF4,CCNB2,MAD2L1,PLK1,BUB1,BUB3,TTK,CDK1,CCNA2
KEGG	hsa04914	Progesterone-mediated oocyte maturation	8	95	1.47	1.93	8.04e-08	9606.ENSP00000160827,9606.ENSP00000216911,9606.ENSP00000288207,9606.ENSP00000296509,9606.ENSP00000300093,9606.ENSP00000302530,9606.ENSP00000378699,9606.ENSP00000481380	KIF22,AURKA,CCNB2,MAD2L1,PLK1,BUB1,CDK1,CCNA2
KEGG	hsa04114	Oocyte meiosis	8	121	1.37	1.7	3.25e-07	9606.ENSP00000216911,9606.ENSP00000229758,9606.ENSP00000263753,9606.ENSP00000288207,9606.ENSP00000296509,9606.ENSP00000300093,9606.ENSP00000302530,9606.ENSP00000378699	AURKA,FBXO5,SGO1,CCNB2,MAD2L1,PLK1,BUB1,CDK1
KEGG	hsa04115	p53 signaling pathway	4	72	1.29	0.69	0.0054	9606.ENSP00000288207,9606.ENSP00000353770,9606.ENSP00000378699,9606.ENSP00000415430	CCNB2,RRM2,CDK1,GTSE1
Reactome	HSA-1640170	Cell Cycle	34	658	1.26	3.61	3.46e-32	9606.ENSP00000216911,9606.ENSP00000229758,9606.ENSP00000251496,9606.ENSP00000260363,9606.ENSP00000261597,9606.ENSP00000263753,9606.ENSP00000265728,9606.ENSP00000271452,9606.ENSP00000282074,9606.ENSP00000288207,9606.ENSP00000296417,9606.ENSP00000296509,9606.ENSP00000300093,9606.ENSP00000300403,9606.ENSP00000302530,9606.ENSP00000309790,9606.ENSP00000311083,9606.ENSP00000313950,9606.ENSP00000336799,…	AURKA,FBXO5,NCAPG,KIF23,NDC80,SGO1,DBF4,NUF2,SPC25,CCNB2,H2AZ1,MAD2L1,PLK1,TPX2,BUB1,MIS18BP1,CKS1B,AURKB,TUBA1B,TUBB4B,SMC4,UBE2C,SGO2,RRM2,BUB3,KIF2C,CDCA8,ZWINT,KIF20A,CDK1,TOP2A,HJURP,GTSE1,CCNA2
Reactome	HSA-69278	Cell Cycle, Mitotic	32	526	1.33	4.01	3.46e-32	9606.ENSP00000216911,9606.ENSP00000229758,9606.ENSP00000251496,9606.ENSP00000260363,9606.ENSP00000261597,9606.ENSP00000263753,9606.ENSP00000265728,9606.ENSP00000271452,9606.ENSP00000282074,9606.ENSP00000288207,9606.ENSP00000296417,9606.ENSP00000296509,9606.ENSP00000300093,9606.ENSP00000300403,9606.ENSP00000302530,9606.ENSP00000311083,9606.ENSP00000313950,9606.ENSP00000336799,9606.ENSP00000341289,…	AURKA,FBXO5,NCAPG,KIF23,NDC80,SGO1,DBF4,NUF2,SPC25,CCNB2,H2AZ1,MAD2L1,PLK1,TPX2,BUB1,CKS1B,AURKB,TUBA1B,TUBB4B,SMC4,UBE2C,SGO2,RRM2,BUB3,KIF2C,CDCA8,ZWINT,KIF20A,CDK1,TOP2A,GTSE1,CCNA2
Reactome	HSA-68886	M Phase	24	382	1.34	3.57	2.97e-23	9606.ENSP00000229758,9606.ENSP00000251496,9606.ENSP00000260363,9606.ENSP00000261597,9606.ENSP00000263753,9606.ENSP00000271452,9606.ENSP00000282074,9606.ENSP00000288207,9606.ENSP00000296417,9606.ENSP00000296509,9606.ENSP00000300093,9606.ENSP00000302530,9606.ENSP00000313950,9606.ENSP00000336799,9606.ENSP00000341289,9606.ENSP00000341382,9606.ENSP00000348838,9606.ENSP00000350447,9606.ENSP00000357858,…	FBXO5,NCAPG,KIF23,NDC80,SGO1,NUF2,SPC25,CCNB2,H2AZ1,MAD2L1,PLK1,BUB1,AURKB,TUBA1B,TUBB4B,SMC4,UBE2C,SGO2,BUB3,KIF2C,CDCA8,ZWINT,KIF20A,CDK1
Reactome	HSA-2500257	Resolution of Sister Chromatid Cohesion	17	125	1.68	4.7	5.92e-21	9606.ENSP00000261597,9606.ENSP00000263753,9606.ENSP00000271452,9606.ENSP00000282074,9606.ENSP00000288207,9606.ENSP00000296509,9606.ENSP00000300093,9606.ENSP00000302530,9606.ENSP00000313950,9606.ENSP00000336799,9606.ENSP00000341289,9606.ENSP00000350447,9606.ENSP00000357858,9606.ENSP00000361298,9606.ENSP00000362146,9606.ENSP00000363055,9606.ENSP00000378699	NDC80,SGO1,NUF2,SPC25,CCNB2,MAD2L1,PLK1,BUB1,AURKB,TUBA1B,TUBB4B,SGO2,BUB3,KIF2C,CDCA8,ZWINT,CDK1
Reactome	HSA-68877	Mitotic Prometaphase	19	201	1.52	4.1	5.92e-21	9606.ENSP00000251496,9606.ENSP00000261597,9606.ENSP00000263753,9606.ENSP00000271452,9606.ENSP00000282074,9606.ENSP00000288207,9606.ENSP00000296509,9606.ENSP00000300093,9606.ENSP00000302530,9606.ENSP00000313950,9606.ENSP00000336799,9606.ENSP00000341289,9606.ENSP00000341382,9606.ENSP00000350447,9606.ENSP00000357858,9606.ENSP00000361298,9606.ENSP00000362146,9606.ENSP00000363055,9606.ENSP00000378699	NCAPG,NDC80,SGO1,NUF2,SPC25,CCNB2,MAD2L1,PLK1,BUB1,AURKB,TUBA1B,TUBB4B,SMC4,SGO2,BUB3,KIF2C,CDCA8,ZWINT,CDK1
Reactome	HSA-2555396	Mitotic Metaphase and Anaphase	19	233	1.46	3.74	5.46e-20	9606.ENSP00000229758,9606.ENSP00000261597,9606.ENSP00000263753,9606.ENSP00000271452,9606.ENSP00000282074,9606.ENSP00000288207,9606.ENSP00000296509,9606.ENSP00000300093,9606.ENSP00000302530,9606.ENSP00000313950,9606.ENSP00000336799,9606.ENSP00000341289,9606.ENSP00000348838,9606.ENSP00000350447,9606.ENSP00000357858,9606.ENSP00000361298,9606.ENSP00000362146,9606.ENSP00000363055,9606.ENSP00000378699	FBXO5,NDC80,SGO1,NUF2,SPC25,CCNB2,MAD2L1,PLK1,BUB1,AURKB,TUBA1B,TUBB4B,UBE2C,SGO2,BUB3,KIF2C,CDCA8,ZWINT,CDK1
Reactome	HSA-69620	Cell Cycle Checkpoints	19	272	1.39	3.38	7.39e-19	9606.ENSP00000261597,9606.ENSP00000263753,9606.ENSP00000265728,9606.ENSP00000271452,9606.ENSP00000282074,9606.ENSP00000288207,9606.ENSP00000296509,9606.ENSP00000300093,9606.ENSP00000302530,9606.ENSP00000313950,9606.ENSP00000348838,9606.ENSP00000350447,9606.ENSP00000357858,9606.ENSP00000361298,9606.ENSP00000362146,9606.ENSP00000363055,9606.ENSP00000378699,9606.ENSP00000415430,9606.ENSP00000481380	NDC80,SGO1,DBF4,NUF2,SPC25,CCNB2,MAD2L1,PLK1,BUB1,AURKB,UBE2C,SGO2,BUB3,KIF2C,CDCA8,ZWINT,CDK1,GTSE1,CCNA2
Reactome	HSA-68882	Mitotic Anaphase	18	232	1.44	3.51	1.48e-18	9606.ENSP00000261597,9606.ENSP00000263753,9606.ENSP00000271452,9606.ENSP00000282074,9606.ENSP00000288207,9606.ENSP00000296509,9606.ENSP00000300093,9606.ENSP00000302530,9606.ENSP00000313950,9606.ENSP00000336799,9606.ENSP00000341289,9606.ENSP00000348838,9606.ENSP00000350447,9606.ENSP00000357858,9606.ENSP00000361298,9606.ENSP00000362146,9606.ENSP00000363055,9606.ENSP00000378699	NDC80,SGO1,NUF2,SPC25,CCNB2,MAD2L1,PLK1,BUB1,AURKB,TUBA1B,TUBB4B,UBE2C,SGO2,BUB3,KIF2C,CDCA8,ZWINT,CDK1
Reactome	HSA-9648025	EML4 and NUDC in mitotic spindle formation	15	116	1.66	4.19	3.03e-18	9606.ENSP00000261597,9606.ENSP00000263753,9606.ENSP00000271452,9606.ENSP00000282074,9606.ENSP00000296509,9606.ENSP00000300093,9606.ENSP00000302530,9606.ENSP00000313950,9606.ENSP00000336799,9606.ENSP00000341289,9606.ENSP00000350447,9606.ENSP00000357858,9606.ENSP00000361298,9606.ENSP00000362146,9606.ENSP00000363055	NDC80,SGO1,NUF2,SPC25,MAD2L1,PLK1,BUB1,AURKB,TUBA1B,TUBB4B,SGO2,BUB3,KIF2C,CDCA8,ZWINT
Reactome	HSA-5663220	RHO GTPases Activate Formins	15	139	1.58	3.79	3.35e-17	9606.ENSP00000261597,9606.ENSP00000263753,9606.ENSP00000271452,9606.ENSP00000282074,9606.ENSP00000296509,9606.ENSP00000300093,9606.ENSP00000302530,9606.ENSP00000313950,9606.ENSP00000336799,9606.ENSP00000341289,9606.ENSP00000350447,9606.ENSP00000357858,9606.ENSP00000361298,9606.ENSP00000362146,9606.ENSP00000363055	NDC80,SGO1,NUF2,SPC25,MAD2L1,PLK1,BUB1,AURKB,TUBA1B,TUBB4B,SGO2,BUB3,KIF2C,CDCA8,ZWINT
Reactome	HSA-2467813	Separation of Sister Chromatids	16	189	1.47	3.44	6e-17	9606.ENSP00000261597,9606.ENSP00000263753,9606.ENSP00000271452,9606.ENSP00000282074,9606.ENSP00000296509,9606.ENSP00000300093,9606.ENSP00000302530,9606.ENSP00000313950,9606.ENSP00000336799,9606.ENSP00000341289,9606.ENSP00000348838,9606.ENSP00000350447,9606.ENSP00000357858,9606.ENSP00000361298,9606.ENSP00000362146,9606.ENSP00000363055	NDC80,SGO1,NUF2,SPC25,MAD2L1,PLK1,BUB1,AURKB,TUBA1B,TUBB4B,UBE2C,SGO2,BUB3,KIF2C,CDCA8,ZWINT
Reactome	HSA-69618	Mitotic Spindle Checkpoint	14	111	1.65	3.94	6.89e-17	9606.ENSP00000261597,9606.ENSP00000263753,9606.ENSP00000271452,9606.ENSP00000282074,9606.ENSP00000296509,9606.ENSP00000300093,9606.ENSP00000302530,9606.ENSP00000313950,9606.ENSP00000348838,9606.ENSP00000350447,9606.ENSP00000357858,9606.ENSP00000361298,9606.ENSP00000362146,9606.ENSP00000363055	NDC80,SGO1,NUF2,SPC25,MAD2L1,PLK1,BUB1,AURKB,UBE2C,SGO2,BUB3,KIF2C,CDCA8,ZWINT
Reactome	HSA-141444	Amplification of signal from unattached kinetochores via a MAD2 inhibitory signal	13	94	1.69	3.89	4.45e-16	9606.ENSP00000261597,9606.ENSP00000263753,9606.ENSP00000271452,9606.ENSP00000282074,9606.ENSP00000296509,9606.ENSP00000300093,9606.ENSP00000302530,9606.ENSP00000313950,9606.ENSP00000350447,9606.ENSP00000357858,9606.ENSP00000361298,9606.ENSP00000362146,9606.ENSP00000363055	NDC80,SGO1,NUF2,SPC25,MAD2L1,PLK1,BUB1,AURKB,SGO2,BUB3,KIF2C,CDCA8,ZWINT
Reactome	HSA-195258	RHO GTPase Effectors	17	292	1.31	2.8	1.11e-15	9606.ENSP00000261597,9606.ENSP00000263753,9606.ENSP00000271452,9606.ENSP00000282074,9606.ENSP00000296417,9606.ENSP00000296509,9606.ENSP00000300093,9606.ENSP00000302530,9606.ENSP00000313950,9606.ENSP00000336799,9606.ENSP00000341289,9606.ENSP00000350447,9606.ENSP00000357858,9606.ENSP00000361298,9606.ENSP00000362146,9606.ENSP00000363055,9606.ENSP00000377793	NDC80,SGO1,NUF2,SPC25,H2AZ1,MAD2L1,PLK1,BUB1,AURKB,TUBA1B,TUBB4B,SGO2,BUB3,KIF2C,CDCA8,ZWINT,PRC1
Reactome	HSA-194315	Signaling by Rho GTPases	18	672	0.97	1.57	4.21e-11	9606.ENSP00000261597,9606.ENSP00000263753,9606.ENSP00000271452,9606.ENSP00000282074,9606.ENSP00000296417,9606.ENSP00000296509,9606.ENSP00000300093,9606.ENSP00000302530,9606.ENSP00000313950,9606.ENSP00000336799,9606.ENSP00000341289,9606.ENSP00000350447,9606.ENSP00000357858,9606.ENSP00000361298,9606.ENSP00000362146,9606.ENSP00000363055,9606.ENSP00000376457,9606.ENSP00000377793	NDC80,SGO1,NUF2,SPC25,H2AZ1,MAD2L1,PLK1,BUB1,AURKB,TUBA1B,TUBB4B,SGO2,BUB3,KIF2C,CDCA8,ZWINT,ECT2,PRC1
Reactome	HSA-174143	APC/C-mediated degradation of cell cycle proteins	9	87	1.56	2.44	8.2e-10	9606.ENSP00000216911,9606.ENSP00000229758,9606.ENSP00000296509,9606.ENSP00000300093,9606.ENSP00000313950,9606.ENSP00000348838,9606.ENSP00000357858,9606.ENSP00000378699,9606.ENSP00000481380	AURKA,FBXO5,MAD2L1,PLK1,AURKB,UBE2C,BUB3,CDK1,CCNA2
Reactome	HSA-983189	Kinesins	7	60	1.61	2.04	8.68e-08	9606.ENSP00000160827,9606.ENSP00000260363,9606.ENSP00000260731,9606.ENSP00000336799,9606.ENSP00000341289,9606.ENSP00000361298,9606.ENSP00000378356	KIF22,KIF23,KIF11,TUBA1B,TUBB4B,KIF2C,KIF20A
Reactome	HSA-176408	Regulation of APC/C activators between G1/S and early anaphase	7	80	1.49	1.76	5.32e-07	9606.ENSP00000229758,9606.ENSP00000296509,9606.ENSP00000300093,9606.ENSP00000348838,9606.ENSP00000357858,9606.ENSP00000378699,9606.ENSP00000481380	FBXO5,MAD2L1,PLK1,UBE2C,BUB3,CDK1,CCNA2
Reactome	HSA-69275	G2/M Transition	9	195	1.21	1.49	5.78e-07	9606.ENSP00000216911,9606.ENSP00000288207,9606.ENSP00000300093,9606.ENSP00000300403,9606.ENSP00000336799,9606.ENSP00000341289,9606.ENSP00000378699,9606.ENSP00000415430,9606.ENSP00000481380	AURKA,CCNB2,PLK1,TPX2,TUBA1B,TUBB4B,CDK1,GTSE1,CCNA2
Reactome	HSA-6811434	COPI-dependent Golgi-to-ER retrograde traffic	7	99	1.4	1.57	1.86e-06	9606.ENSP00000160827,9606.ENSP00000260363,9606.ENSP00000260731,9606.ENSP00000336799,9606.ENSP00000341289,9606.ENSP00000361298,9606.ENSP00000378356	KIF22,KIF23,KIF11,TUBA1B,TUBB4B,KIF2C,KIF20A
Reactome	HSA-2132295	MHC class II antigen presentation	7	122	1.3	1.38	6.98e-06	9606.ENSP00000160827,9606.ENSP00000260363,9606.ENSP00000260731,9606.ENSP00000336799,9606.ENSP00000341289,9606.ENSP00000361298,9606.ENSP00000378356	KIF22,KIF23,KIF11,TUBA1B,TUBB4B,KIF2C,KIF20A
Reactome	HSA-2514853	Condensation of Prometaphase Chromosomes	4	11	2.11	1.71	6.98e-06	9606.ENSP00000251496,9606.ENSP00000288207,9606.ENSP00000341382,9606.ENSP00000378699	NCAPG,CCNB2,SMC4,CDK1
Reactome	HSA-176814	Activation of APC/C and APC/C:Cdc20 mediated degradation of mitotic proteins	6	76	1.44	1.44	9.88e-06	9606.ENSP00000296509,9606.ENSP00000300093,9606.ENSP00000348838,9606.ENSP00000357858,9606.ENSP00000378699,9606.ENSP00000481380	MAD2L1,PLK1,UBE2C,BUB3,CDK1,CCNA2
Reactome	HSA-8852276	The role of GTSE1 in G2/M progression after G2 checkpoint	6	77	1.44	1.43	1.02e-05	9606.ENSP00000288207,9606.ENSP00000300093,9606.ENSP00000336799,9606.ENSP00000341289,9606.ENSP00000378699,9606.ENSP00000415430	CCNB2,PLK1,TUBA1B,TUBB4B,CDK1,GTSE1
Reactome	HSA-453279	Mitotic G1 phase and G1/S transition	7	148	1.22	1.23	2.04e-05	9606.ENSP00000229758,9606.ENSP00000265728,9606.ENSP00000311083,9606.ENSP00000353770,9606.ENSP00000378699,9606.ENSP00000411532,9606.ENSP00000481380	FBXO5,DBF4,CKS1B,RRM2,CDK1,TOP2A,CCNA2
Reactome	HSA-69273	Cyclin A/B1/B2 associated events during G2/M transition	4	25	1.75	1.29	9.31e-05	9606.ENSP00000288207,9606.ENSP00000300093,9606.ENSP00000378699,9606.ENSP00000481380	CCNB2,PLK1,CDK1,CCNA2
Reactome	HSA-176417	Phosphorylation of Emi1	3	6	2.25	1.33	0.00012	9606.ENSP00000229758,9606.ENSP00000300093,9606.ENSP00000378699	FBXO5,PLK1,CDK1
Reactome	HSA-69206	G1/S Transition	6	130	1.21	1.04	0.00015	9606.ENSP00000229758,9606.ENSP00000265728,9606.ENSP00000311083,9606.ENSP00000353770,9606.ENSP00000378699,9606.ENSP00000481380	FBXO5,DBF4,CKS1B,RRM2,CDK1,CCNA2
Reactome	HSA-174184	Cdc20:Phospho-APC/C mediated degradation of Cyclin A	5	72	1.39	1.12	0.00016	9606.ENSP00000296509,9606.ENSP00000348838,9606.ENSP00000357858,9606.ENSP00000378699,9606.ENSP00000481380	MAD2L1,UBE2C,BUB3,CDK1,CCNA2
Reactome	HSA-2980767	Activation of NIMA Kinases NEK9, NEK6, NEK7	3	7	2.18	1.28	0.00016	9606.ENSP00000288207,9606.ENSP00000300093,9606.ENSP00000378699	CCNB2,PLK1,CDK1
Reactome	HSA-8854518	AURKA Activation by TPX2	5	72	1.39	1.12	0.00016	9606.ENSP00000216911,9606.ENSP00000300093,9606.ENSP00000300403,9606.ENSP00000341289,9606.ENSP00000378699	AURKA,PLK1,TPX2,TUBB4B,CDK1
Reactome	HSA-162582	Signal Transduction	21	2540	0.46	0.52	0.00017	9606.ENSP00000247191,9606.ENSP00000261597,9606.ENSP00000263753,9606.ENSP00000271452,9606.ENSP00000282074,9606.ENSP00000296417,9606.ENSP00000296509,9606.ENSP00000300093,9606.ENSP00000302530,9606.ENSP00000313950,9606.ENSP00000336799,9606.ENSP00000341289,9606.ENSP00000350447,9606.ENSP00000357858,9606.ENSP00000361298,9606.ENSP00000362146,9606.ENSP00000363055,9606.ENSP00000376457,9606.ENSP00000377793,…	DLGAP5,NDC80,SGO1,NUF2,SPC25,H2AZ1,MAD2L1,PLK1,BUB1,AURKB,TUBA1B,TUBB4B,SGO2,BUB3,KIF2C,CDCA8,ZWINT,ECT2,PRC1,CDK1,KPNA2
Reactome	HSA-2565942	Regulation of PLK1 Activity at G2/M Transition	5	87	1.31	1	0.00034	9606.ENSP00000216911,9606.ENSP00000288207,9606.ENSP00000300093,9606.ENSP00000341289,9606.ENSP00000378699	AURKA,CCNB2,PLK1,TUBB4B,CDK1
Reactome	HSA-2299718	Condensation of Prophase Chromosomes	4	43	1.51	1.03	0.0005	9606.ENSP00000296417,9606.ENSP00000300093,9606.ENSP00000341382,9606.ENSP00000378699	H2AZ1,PLK1,SMC4,CDK1
Reactome	HSA-4615885	SUMOylation of DNA replication proteins	4	45	1.5	1	0.00058	9606.ENSP00000216911,9606.ENSP00000313950,9606.ENSP00000362146,9606.ENSP00000411532	AURKA,AURKB,CDCA8,TOP2A
Reactome	HSA-68884	Mitotic Telophase/Cytokinesis	3	13	1.91	1.07	0.0006	9606.ENSP00000260363,9606.ENSP00000300093,9606.ENSP00000378356	KIF23,PLK1,KIF20A
Reactome	HSA-162658	Golgi Cisternae Pericentriolar Stack Reorganization	3	14	1.88	1.04	0.00071	9606.ENSP00000288207,9606.ENSP00000300093,9606.ENSP00000378699	CCNB2,PLK1,CDK1
Reactome	HSA-68875	Mitotic Prophase	5	111	1.2	0.86	0.00094	9606.ENSP00000288207,9606.ENSP00000296417,9606.ENSP00000300093,9606.ENSP00000341382,9606.ENSP00000378699	CCNB2,H2AZ1,PLK1,SMC4,CDK1
Reactome	HSA-176412	Phosphorylation of the APC/C	3	20	1.72	0.91	0.0017	9606.ENSP00000300093,9606.ENSP00000348838,9606.ENSP00000378699	PLK1,UBE2C,CDK1
Reactome	HSA-141430	Inactivation of APC/C via direct inhibition of the APC/C complex	3	21	1.7	0.88	0.002	9606.ENSP00000296509,9606.ENSP00000348838,9606.ENSP00000357858	MAD2L1,UBE2C,BUB3
Reactome	HSA-68881	Mitotic Metaphase/Anaphase Transition	2	2	2.55	0.92	0.0021	9606.ENSP00000229758,9606.ENSP00000300093	FBXO5,PLK1
Reactome	HSA-174178	APC/C:Cdh1 mediated degradation of Cdc20 and other APC/C:Cdh1 targeted proteins in late mitosis/early G1	4	73	1.28	0.76	0.0029	9606.ENSP00000216911,9606.ENSP00000300093,9606.ENSP00000313950,9606.ENSP00000348838	AURKA,PLK1,AURKB,UBE2C
Reactome	HSA-2995410	Nuclear Envelope (NE) Reassembly	4	74	1.28	0.76	0.003	9606.ENSP00000288207,9606.ENSP00000336799,9606.ENSP00000341289,9606.ENSP00000378699	CCNB2,TUBA1B,TUBB4B,CDK1
Reactome	HSA-179409	APC-Cdc20 mediated degradation of Nek2A	3	26	1.61	0.81	0.0032	9606.ENSP00000296509,9606.ENSP00000348838,9606.ENSP00000357858	MAD2L1,UBE2C,BUB3
Reactome	HSA-170145	Phosphorylation of proteins involved in the G2/M transition by Cyclin A:Cdc2 complexes	2	3	2.37	0.85	0.0033	9606.ENSP00000378699,9606.ENSP00000481380	CDK1,CCNA2
Reactome	HSA-1538133	G0 and Early G1	3	27	1.59	0.8	0.0034	9606.ENSP00000378699,9606.ENSP00000411532,9606.ENSP00000481380	CDK1,TOP2A,CCNA2
Reactome	HSA-69205	G1/S-Specific Transcription	3	28	1.58	0.79	0.0037	9606.ENSP00000229758,9606.ENSP00000353770,9606.ENSP00000378699	FBXO5,RRM2,CDK1
Reactome	HSA-5633007	Regulation of TP53 Activity	5	159	1.04	0.66	0.004	9606.ENSP00000216911,9606.ENSP00000300403,9606.ENSP00000313950,9606.ENSP00000378699,9606.ENSP00000481380	AURKA,TPX2,AURKB,CDK1,CCNA2
Reactome	HSA-6804756	Regulation of TP53 Activity through Phosphorylation	4	92	1.18	0.66	0.0061	9606.ENSP00000216911,9606.ENSP00000300403,9606.ENSP00000313950,9606.ENSP00000481380	AURKA,TPX2,AURKB,CCNA2
Reactome	HSA-380320	Recruitment of NuMA to mitotic centrosomes	4	93	1.18	0.66	0.0062	9606.ENSP00000300093,9606.ENSP00000336799,9606.ENSP00000341289,9606.ENSP00000378699	PLK1,TUBA1B,TUBB4B,CDK1
Reactome	HSA-69478	G2/M DNA replication checkpoint	2	5	2.15	0.75	0.0062	9606.ENSP00000288207,9606.ENSP00000378699	CCNB2,CDK1
Reactome	HSA-73886	Chromosome Maintenance	4	120	1.07	0.53	0.0155	9606.ENSP00000296417,9606.ENSP00000309790,9606.ENSP00000414109,9606.ENSP00000481380	H2AZ1,MIS18BP1,HJURP,CCNA2
Reactome	HSA-6791312	TP53 Regulates Transcription of Cell Cycle Genes	3	49	1.33	0.57	0.0157	9606.ENSP00000216911,9606.ENSP00000378699,9606.ENSP00000481380	AURKA,CDK1,CCNA2
Reactome	HSA-606279	Deposition of new CENPA-containing nucleosomes at the centromere	3	54	1.29	0.54	0.0199	9606.ENSP00000296417,9606.ENSP00000309790,9606.ENSP00000414109	H2AZ1,MIS18BP1,HJURP
Reactome	HSA-69481	G2/M Checkpoints	4	149	0.98	0.44	0.0317	9606.ENSP00000265728,9606.ENSP00000288207,9606.ENSP00000378699,9606.ENSP00000415430	DBF4,CCNB2,CDK1,GTSE1
Reactome	HSA-69306	DNA Replication	4	156	0.96	0.42	0.0368	9606.ENSP00000265728,9606.ENSP00000296417,9606.ENSP00000348838,9606.ENSP00000481380	DBF4,H2AZ1,UBE2C,CCNA2
Reactome	HSA-380259	Loss of Nlp from mitotic centrosomes	3	69	1.18	0.45	0.0371	9606.ENSP00000300093,9606.ENSP00000341289,9606.ENSP00000378699	PLK1,TUBB4B,CDK1
Reactome	HSA-1362300	Transcription of E2F targets under negative control by p107 (RBL1) and p130 (RBL2) in complex with HDAC1	2	16	1.64	0.48	0.0377	9606.ENSP00000378699,9606.ENSP00000481380	CDK1,CCNA2
Reactome	HSA-156711	Polo-like kinase mediated events	2	16	1.64	0.48	0.0377	9606.ENSP00000288207,9606.ENSP00000300093	CCNB2,PLK1
Reactome	HSA-1280218	Adaptive Immune System	8	758	0.57	0.33	0.0421	9606.ENSP00000160827,9606.ENSP00000260363,9606.ENSP00000260731,9606.ENSP00000336799,9606.ENSP00000341289,9606.ENSP00000348838,9606.ENSP00000361298,9606.ENSP00000378356	KIF22,KIF23,KIF11,TUBA1B,TUBB4B,UBE2C,KIF2C,KIF20A
Reactome	HSA-2995383	Initiation of Nuclear Envelope (NE) Reformation	2	18	1.59	0.45	0.0442	9606.ENSP00000288207,9606.ENSP00000378699	CCNB2,CDK1
Reactome	HSA-6804114	TP53 Regulates Transcription of Genes Involved in G2 Cell Cycle Arrest	2	18	1.59	0.45	0.0442	9606.ENSP00000216911,9606.ENSP00000378699	AURKA,CDK1
Reactome	HSA-190840	Microtubule-dependent trafficking of connexons from Golgi to the plasma membrane	2	19	1.57	0.44	0.0469	9606.ENSP00000336799,9606.ENSP00000341289	TUBA1B,TUBB4B
Reactome	HSA-2559582	Senescence-Associated Secretory Phenotype (SASP)	3	81	1.11	0.41	0.0484	9606.ENSP00000296417,9606.ENSP00000348838,9606.ENSP00000481380	H2AZ1,UBE2C,CCNA2
Reactome	HSA-380270	Recruitment of mitotic centrosome proteins and complexes	3	80	1.12	0.41	0.0484	9606.ENSP00000300093,9606.ENSP00000341289,9606.ENSP00000378699	PLK1,TUBB4B,CDK1
Reactome	HSA-438064	Post NMDA receptor activation events	3	80	1.12	0.41	0.0484	9606.ENSP00000336799,9606.ENSP00000341289,9606.ENSP00000438483	TUBA1B,TUBB4B,KPNA2
WikiPathways	WP2446	Retinoblastoma gene in cancer	8	87	1.51	1.88	1.94e-07	9606.ENSP00000288207,9606.ENSP00000296417,9606.ENSP00000296503,9606.ENSP00000353770,9606.ENSP00000358813,9606.ENSP00000378699,9606.ENSP00000411532,9606.ENSP00000481380	CCNB2,H2AZ1,HMGB2,RRM2,TTK,CDK1,TOP2A,CCNA2
WikiPathways	WP179	Cell cycle	8	120	1.37	1.6	1.06e-06	9606.ENSP00000265728,9606.ENSP00000288207,9606.ENSP00000300093,9606.ENSP00000302530,9606.ENSP00000357858,9606.ENSP00000358813,9606.ENSP00000378699,9606.ENSP00000481380	DBF4,CCNB2,PLK1,BUB1,BUB3,TTK,CDK1,CCNA2
WikiPathways	WP2361	Gastric cancer network 1	5	28	1.8	1.6	8.87e-06	9606.ENSP00000216911,9606.ENSP00000300403,9606.ENSP00000348838,9606.ENSP00000376457,9606.ENSP00000411532	AURKA,TPX2,UBE2C,ECT2,TOP2A
WikiPathways	WP5117	Cohesin complex - Cornelia de Lange syndrome	5	34	1.71	1.5	1.59e-05	9606.ENSP00000263753,9606.ENSP00000300093,9606.ENSP00000313950,9606.ENSP00000350447,9606.ENSP00000378699	SGO1,PLK1,AURKB,SGO2,CDK1
WikiPathways	WP4240	Regulation of sister chromatid separation at the metaphase-anaphase transition	3	15	1.85	0.86	0.0027	9606.ENSP00000296509,9606.ENSP00000302530,9606.ENSP00000357858	MAD2L1,BUB1,BUB3
WikiPathways	WP2363	Gastric cancer network 2	3	31	1.53	0.59	0.0158	9606.ENSP00000348838,9606.ENSP00000411532,9606.ENSP00000494957	UBE2C,TOP2A,UBE2T
WikiPathways	WP2038	Microtubule cytoskeleton regulation	3	46	1.36	0.46	0.038	9606.ENSP00000313950,9606.ENSP00000361298,9606.ENSP00000378699	AURKB,KIF2C,CDK1
WikiPathways	WP3878	ATM signaling in development and disease	3	45	1.37	0.46	0.038	9606.ENSP00000302530,9606.ENSP00000313950,9606.ENSP00000378699	BUB1,AURKB,CDK1
COMPARTMENTS	GOCC:0005819	Spindle	23	289	1.45	4.08	7.41e-24	9606.ENSP00000160827,9606.ENSP00000216911,9606.ENSP00000229758,9606.ENSP00000247191,9606.ENSP00000249776,9606.ENSP00000260363,9606.ENSP00000260731,9606.ENSP00000263753,9606.ENSP00000296509,9606.ENSP00000300093,9606.ENSP00000300403,9606.ENSP00000305204,9606.ENSP00000313950,9606.ENSP00000341289,9606.ENSP00000358813,9606.ENSP00000358925,9606.ENSP00000362146,9606.ENSP00000367276,9606.ENSP00000376457,…	KIF22,AURKA,FBXO5,DLGAP5,KNSTRN,KIF23,KIF11,SGO1,MAD2L1,PLK1,TPX2,CKAP2L,AURKB,TUBB4B,TTK,PSRC1,CDCA8,CKAP2,ECT2,PRC1,KIF20A,CDK1,FAM83D
COMPARTMENTS	GOCC:0000775	Chromosome, centromeric region	18	160	1.6	4.36	1.16e-20	9606.ENSP00000160827,9606.ENSP00000249776,9606.ENSP00000261597,9606.ENSP00000263753,9606.ENSP00000271452,9606.ENSP00000282074,9606.ENSP00000296509,9606.ENSP00000300093,9606.ENSP00000302530,9606.ENSP00000309790,9606.ENSP00000313950,9606.ENSP00000350447,9606.ENSP00000357858,9606.ENSP00000358813,9606.ENSP00000361298,9606.ENSP00000362146,9606.ENSP00000363055,9606.ENSP00000414109	KIF22,KNSTRN,NDC80,SGO1,NUF2,SPC25,MAD2L1,PLK1,BUB1,MIS18BP1,AURKB,SGO2,BUB3,TTK,KIF2C,CDCA8,ZWINT,HJURP
COMPARTMENTS	GOCC:0000793	Condensed chromosome	19	205	1.51	4.03	1.16e-20	9606.ENSP00000160827,9606.ENSP00000249776,9606.ENSP00000251496,9606.ENSP00000261597,9606.ENSP00000263753,9606.ENSP00000271452,9606.ENSP00000282074,9606.ENSP00000296503,9606.ENSP00000296509,9606.ENSP00000300093,9606.ENSP00000302530,9606.ENSP00000313950,9606.ENSP00000341382,9606.ENSP00000350447,9606.ENSP00000357858,9606.ENSP00000358813,9606.ENSP00000361298,9606.ENSP00000363055,9606.ENSP00000414109	KIF22,KNSTRN,NCAPG,NDC80,SGO1,NUF2,SPC25,HMGB2,MAD2L1,PLK1,BUB1,AURKB,SMC4,SGO2,BUB3,TTK,KIF2C,ZWINT,HJURP
COMPARTMENTS	GOCC:0000779	Condensed chromosome, centromeric region	16	112	1.7	4.62	5.19e-20	9606.ENSP00000160827,9606.ENSP00000249776,9606.ENSP00000261597,9606.ENSP00000263753,9606.ENSP00000271452,9606.ENSP00000282074,9606.ENSP00000296509,9606.ENSP00000300093,9606.ENSP00000302530,9606.ENSP00000313950,9606.ENSP00000350447,9606.ENSP00000357858,9606.ENSP00000358813,9606.ENSP00000361298,9606.ENSP00000363055,9606.ENSP00000414109	KIF22,KNSTRN,NDC80,SGO1,NUF2,SPC25,MAD2L1,PLK1,BUB1,AURKB,SGO2,BUB3,TTK,KIF2C,ZWINT,HJURP
COMPARTMENTS	GOCC:0043232	Intracellular non-membrane-bounded organelle	43	3309	0.66	1.13	5.19e-20	9606.ENSP00000160827,9606.ENSP00000216911,9606.ENSP00000229758,9606.ENSP00000247191,9606.ENSP00000249776,9606.ENSP00000251496,9606.ENSP00000260363,9606.ENSP00000260731,9606.ENSP00000261597,9606.ENSP00000263753,9606.ENSP00000265728,9606.ENSP00000271452,9606.ENSP00000282074,9606.ENSP00000288207,9606.ENSP00000296417,9606.ENSP00000296503,9606.ENSP00000296509,9606.ENSP00000300093,9606.ENSP00000300403,…	KIF22,AURKA,FBXO5,DLGAP5,KNSTRN,NCAPG,KIF23,KIF11,NDC80,SGO1,DBF4,NUF2,SPC25,CCNB2,H2AZ1,HMGB2,MAD2L1,PLK1,TPX2,BUB1,CKAP2L,MIS18BP1,AURKB,TUBA1B,TUBB4B,SMC4,SGO2,BUB3,TTK,PSRC1,KIF2C,CDCA8,ZWINT,CKAP2,ECT2,PRC1,KIF20A,CDK1,TOP2A,HJURP,GTSE1,FAM83D,UBE2T
COMPARTMENTS	GOCC:0098687	Chromosomal region	19	227	1.47	3.79	5.19e-20	9606.ENSP00000160827,9606.ENSP00000249776,9606.ENSP00000261597,9606.ENSP00000263753,9606.ENSP00000271452,9606.ENSP00000282074,9606.ENSP00000296509,9606.ENSP00000300093,9606.ENSP00000302530,9606.ENSP00000309790,9606.ENSP00000313950,9606.ENSP00000350447,9606.ENSP00000357858,9606.ENSP00000358813,9606.ENSP00000361298,9606.ENSP00000362146,9606.ENSP00000363055,9606.ENSP00000378699,9606.ENSP00000414109	KIF22,KNSTRN,NDC80,SGO1,NUF2,SPC25,MAD2L1,PLK1,BUB1,MIS18BP1,AURKB,SGO2,BUB3,TTK,KIF2C,CDCA8,ZWINT,CDK1,HJURP
COMPARTMENTS	GOCC:0000776	Kinetochore	16	115	1.69	4.58	5.21e-20	9606.ENSP00000160827,9606.ENSP00000249776,9606.ENSP00000261597,9606.ENSP00000263753,9606.ENSP00000271452,9606.ENSP00000282074,9606.ENSP00000296509,9606.ENSP00000300093,9606.ENSP00000302530,9606.ENSP00000313950,9606.ENSP00000350447,9606.ENSP00000357858,9606.ENSP00000358813,9606.ENSP00000361298,9606.ENSP00000363055,9606.ENSP00000414109	KIF22,KNSTRN,NDC80,SGO1,NUF2,SPC25,MAD2L1,PLK1,BUB1,AURKB,SGO2,BUB3,TTK,KIF2C,ZWINT,HJURP
COMPARTMENTS	GOCC:0015630	Microtubule cytoskeleton	28	973	1.01	2.05	1.88e-19	9606.ENSP00000160827,9606.ENSP00000216911,9606.ENSP00000229758,9606.ENSP00000247191,9606.ENSP00000249776,9606.ENSP00000260363,9606.ENSP00000260731,9606.ENSP00000261597,9606.ENSP00000263753,9606.ENSP00000288207,9606.ENSP00000296509,9606.ENSP00000300093,9606.ENSP00000300403,9606.ENSP00000305204,9606.ENSP00000313950,9606.ENSP00000336799,9606.ENSP00000341289,9606.ENSP00000358813,9606.ENSP00000358925,…	KIF22,AURKA,FBXO5,DLGAP5,KNSTRN,KIF23,KIF11,NDC80,SGO1,CCNB2,MAD2L1,PLK1,TPX2,CKAP2L,AURKB,TUBA1B,TUBB4B,TTK,PSRC1,KIF2C,CDCA8,CKAP2,ECT2,PRC1,KIF20A,CDK1,GTSE1,FAM83D
COMPARTMENTS	GOCC:0072686	Mitotic spindle	14	133	1.57	3.54	8.67e-16	9606.ENSP00000160827,9606.ENSP00000216911,9606.ENSP00000249776,9606.ENSP00000260363,9606.ENSP00000260731,9606.ENSP00000296509,9606.ENSP00000300403,9606.ENSP00000305204,9606.ENSP00000341289,9606.ENSP00000367276,9606.ENSP00000376457,9606.ENSP00000377793,9606.ENSP00000378699,9606.ENSP00000481465	KIF22,AURKA,KNSTRN,KIF23,KIF11,MAD2L1,TPX2,CKAP2L,TUBB4B,CKAP2,ECT2,PRC1,CDK1,FAM83D
COMPARTMENTS	GOCC:0005694	Chromosome	24	951	0.95	1.71	6.66e-15	9606.ENSP00000160827,9606.ENSP00000249776,9606.ENSP00000251496,9606.ENSP00000261597,9606.ENSP00000263753,9606.ENSP00000265728,9606.ENSP00000271452,9606.ENSP00000282074,9606.ENSP00000296417,9606.ENSP00000296503,9606.ENSP00000296509,9606.ENSP00000300093,9606.ENSP00000302530,9606.ENSP00000309790,9606.ENSP00000313950,9606.ENSP00000341382,9606.ENSP00000350447,9606.ENSP00000357858,9606.ENSP00000358813,…	KIF22,KNSTRN,NCAPG,NDC80,SGO1,DBF4,NUF2,SPC25,H2AZ1,HMGB2,MAD2L1,PLK1,BUB1,MIS18BP1,AURKB,SMC4,SGO2,BUB3,TTK,KIF2C,CDCA8,ZWINT,CDK1,HJURP
COMPARTMENTS	GOCC:0099080	Supramolecular complex	23	844	0.98	1.8	6.85e-15	9606.ENSP00000160827,9606.ENSP00000249776,9606.ENSP00000260731,9606.ENSP00000261597,9606.ENSP00000263753,9606.ENSP00000271452,9606.ENSP00000282074,9606.ENSP00000296509,9606.ENSP00000300093,9606.ENSP00000300403,9606.ENSP00000302530,9606.ENSP00000313950,9606.ENSP00000336799,9606.ENSP00000341289,9606.ENSP00000350447,9606.ENSP00000357858,9606.ENSP00000358813,9606.ENSP00000361298,9606.ENSP00000363055,…	KIF22,KNSTRN,KIF11,NDC80,SGO1,NUF2,SPC25,MAD2L1,PLK1,TPX2,BUB1,AURKB,TUBA1B,TUBB4B,SGO2,BUB3,TTK,KIF2C,ZWINT,PRC1,CDK1,HJURP,GTSE1
COMPARTMENTS	GOCC:0000922	Spindle pole	11	118	1.52	2.73	1.14e-11	9606.ENSP00000216911,9606.ENSP00000247191,9606.ENSP00000260731,9606.ENSP00000263753,9606.ENSP00000296509,9606.ENSP00000300093,9606.ENSP00000300403,9606.ENSP00000313950,9606.ENSP00000358925,9606.ENSP00000367276,9606.ENSP00000481465	AURKA,DLGAP5,KIF11,SGO1,MAD2L1,PLK1,TPX2,AURKB,PSRC1,CKAP2,FAM83D
COMPARTMENTS	GOCC:0005634	Nucleus	40	4787	0.47	0.7	2.49e-11	9606.ENSP00000216911,9606.ENSP00000229758,9606.ENSP00000242776,9606.ENSP00000247191,9606.ENSP00000250056,9606.ENSP00000251496,9606.ENSP00000260363,9606.ENSP00000261597,9606.ENSP00000263753,9606.ENSP00000265728,9606.ENSP00000271452,9606.ENSP00000288207,9606.ENSP00000296417,9606.ENSP00000296503,9606.ENSP00000296509,9606.ENSP00000300093,9606.ENSP00000300403,9606.ENSP00000302530,9606.ENSP00000309790,…	AURKA,FBXO5,DDX39A,DLGAP5,PIMREG,NCAPG,KIF23,NDC80,SGO1,DBF4,NUF2,CCNB2,H2AZ1,HMGB2,MAD2L1,PLK1,TPX2,BUB1,MIS18BP1,CKS1B,AURKB,SMC4,UBE2C,SGO2,BUB3,PSRC1,CDCA8,ZWINT,ECT2,PRC1,KIF20A,CDK1,TOP2A,HJURP,GTSE1,PBK,KPNA2,CCNA2,UBE2T,NUSAP1
COMPARTMENTS	GOCC:0043229	Intracellular organelle	51	9609	0.27	0.47	2.84e-09	9606.ENSP00000160827,9606.ENSP00000216911,9606.ENSP00000229758,9606.ENSP00000242776,9606.ENSP00000247191,9606.ENSP00000249776,9606.ENSP00000250056,9606.ENSP00000251496,9606.ENSP00000260363,9606.ENSP00000260731,9606.ENSP00000261597,9606.ENSP00000263753,9606.ENSP00000265728,9606.ENSP00000271452,9606.ENSP00000282074,9606.ENSP00000288207,9606.ENSP00000296417,9606.ENSP00000296503,9606.ENSP00000296509,…	KIF22,AURKA,FBXO5,DDX39A,DLGAP5,KNSTRN,PIMREG,NCAPG,KIF23,KIF11,NDC80,SGO1,DBF4,NUF2,SPC25,CCNB2,H2AZ1,HMGB2,MAD2L1,PLK1,TPX2,BUB1,CKAP2L,MIS18BP1,CKS1B,AURKB,TUBA1B,TUBB4B,SMC4,UBE2C,SGO2,BUB3,TTK,PSRC1,KIF2C,CDCA8,ZWINT,CKAP2,ECT2,PRC1,KIF20A,CDK1,TOP2A,HJURP,GTSE1,PBK,KPNA2,CCNA2,FAM83D,UBE2T,NUSAP1
COMPARTMENTS	GOCC:0030496	Midbody	9	142	1.35	1.83	5e-08	9606.ENSP00000216911,9606.ENSP00000260363,9606.ENSP00000300093,9606.ENSP00000313950,9606.ENSP00000362146,9606.ENSP00000376457,9606.ENSP00000377793,9606.ENSP00000378356,9606.ENSP00000378699	AURKA,KIF23,PLK1,AURKB,CDCA8,ECT2,PRC1,KIF20A,CDK1
COMPARTMENTS	GOCC:0031617	NMS complex	5	12	2.17	2.29	1.11e-07	9606.ENSP00000261597,9606.ENSP00000271452,9606.ENSP00000282074,9606.ENSP00000313950,9606.ENSP00000363055	NDC80,NUF2,SPC25,AURKB,ZWINT
COMPARTMENTS	GOCC:0005874	Microtubule	10	233	1.18	1.54	1.64e-07	9606.ENSP00000249776,9606.ENSP00000260731,9606.ENSP00000300403,9606.ENSP00000313950,9606.ENSP00000336799,9606.ENSP00000341289,9606.ENSP00000361298,9606.ENSP00000377793,9606.ENSP00000378699,9606.ENSP00000415430	KNSTRN,KIF11,TPX2,AURKB,TUBA1B,TUBB4B,KIF2C,PRC1,CDK1,GTSE1
COMPARTMENTS	GOCC:0005622	Intracellular	52	11512	0.2	0.38	1.03e-06	9606.ENSP00000160827,9606.ENSP00000216911,9606.ENSP00000229758,9606.ENSP00000242776,9606.ENSP00000247191,9606.ENSP00000249776,9606.ENSP00000250056,9606.ENSP00000251496,9606.ENSP00000260363,9606.ENSP00000260731,9606.ENSP00000261597,9606.ENSP00000263753,9606.ENSP00000265728,9606.ENSP00000271452,9606.ENSP00000282074,9606.ENSP00000288207,9606.ENSP00000296417,9606.ENSP00000296503,9606.ENSP00000296509,…	KIF22,AURKA,FBXO5,DDX39A,DLGAP5,KNSTRN,PIMREG,NCAPG,KIF23,KIF11,NDC80,SGO1,DBF4,NUF2,SPC25,CCNB2,H2AZ1,HMGB2,MAD2L1,PLK1,TPX2,BUB1,CKAP2L,MIS18BP1,CKS1B,AURKB,TUBA1B,TUBB4B,SMC4,UBE2C,SGO2,RRM2,BUB3,TTK,PSRC1,KIF2C,CDCA8,ZWINT,CKAP2,ECT2,PRC1,KIF20A,CDK1,TOP2A,HJURP,GTSE1,PBK,KPNA2,CCNA2,FAM83D,UBE2T,NUSAP1
COMPARTMENTS	GOCC:0005875	Microtubule associated complex	8	150	1.27	1.48	1.5e-06	9606.ENSP00000160827,9606.ENSP00000216911,9606.ENSP00000260363,9606.ENSP00000260731,9606.ENSP00000313950,9606.ENSP00000361298,9606.ENSP00000362146,9606.ENSP00000378356	KIF22,AURKA,KIF23,KIF11,AURKB,KIF2C,CDCA8,KIF20A
COMPARTMENTS	GOCC:0044815	DNA packaging complex	8	159	1.25	1.43	2.22e-06	9606.ENSP00000251496,9606.ENSP00000261597,9606.ENSP00000271452,9606.ENSP00000282074,9606.ENSP00000296417,9606.ENSP00000341382,9606.ENSP00000350447,9606.ENSP00000414109	NCAPG,NDC80,NUF2,SPC25,H2AZ1,SMC4,SGO2,HJURP
COMPARTMENTS	GOCC:0031262	Ndc80 complex	4	8	2.25	1.87	2.7e-06	9606.ENSP00000261597,9606.ENSP00000271452,9606.ENSP00000282074,9606.ENSP00000313950	NDC80,NUF2,SPC25,AURKB
COMPARTMENTS	GOCC:0051233	Spindle midzone	5	31	1.75	1.66	4.95e-06	9606.ENSP00000216911,9606.ENSP00000300093,9606.ENSP00000313950,9606.ENSP00000362146,9606.ENSP00000377793	AURKA,PLK1,AURKB,CDCA8,PRC1
COMPARTMENTS	GOCC:0005813	Centrosome	11	470	0.92	1.03	7.8e-06	9606.ENSP00000216911,9606.ENSP00000247191,9606.ENSP00000249776,9606.ENSP00000260363,9606.ENSP00000261597,9606.ENSP00000263753,9606.ENSP00000288207,9606.ENSP00000300093,9606.ENSP00000305204,9606.ENSP00000367276,9606.ENSP00000378699	AURKA,DLGAP5,KNSTRN,KIF23,NDC80,SGO1,CCNB2,PLK1,CKAP2L,CKAP2,CDK1
COMPARTMENTS	GOCC:0032991	Protein-containing complex	34	5325	0.35	0.48	1.14e-05	9606.ENSP00000160827,9606.ENSP00000216911,9606.ENSP00000249776,9606.ENSP00000251496,9606.ENSP00000260363,9606.ENSP00000260731,9606.ENSP00000261597,9606.ENSP00000265728,9606.ENSP00000271452,9606.ENSP00000282074,9606.ENSP00000288207,9606.ENSP00000296417,9606.ENSP00000296503,9606.ENSP00000296509,9606.ENSP00000300093,9606.ENSP00000302530,9606.ENSP00000309790,9606.ENSP00000311083,9606.ENSP00000313950,…	KIF22,AURKA,KNSTRN,NCAPG,KIF23,KIF11,NDC80,DBF4,NUF2,SPC25,CCNB2,H2AZ1,HMGB2,MAD2L1,PLK1,BUB1,MIS18BP1,CKS1B,AURKB,SMC4,UBE2C,SGO2,RRM2,BUB3,KIF2C,CDCA8,ZWINT,ECT2,KIF20A,CDK1,TOP2A,HJURP,KPNA2,CCNA2
COMPARTMENTS	GOCC:0005871	Kinesin complex	5	46	1.58	1.4	2.57e-05	9606.ENSP00000160827,9606.ENSP00000260363,9606.ENSP00000260731,9606.ENSP00000361298,9606.ENSP00000378356	KIF22,KIF23,KIF11,KIF2C,KIF20A
COMPARTMENTS	GOCC:0045171	Intercellular bridge	6	92	1.36	1.29	2.6e-05	9606.ENSP00000300403,9606.ENSP00000341289,9606.ENSP00000362146,9606.ENSP00000377793,9606.ENSP00000378356,9606.ENSP00000481465	TPX2,TUBB4B,CDCA8,PRC1,KIF20A,FAM83D
COMPARTMENTS	GOCC:0043231	Intracellular membrane-bounded organelle	42	8162	0.26	0.4	2.74e-05	9606.ENSP00000160827,9606.ENSP00000216911,9606.ENSP00000229758,9606.ENSP00000242776,9606.ENSP00000247191,9606.ENSP00000250056,9606.ENSP00000251496,9606.ENSP00000260363,9606.ENSP00000261597,9606.ENSP00000263753,9606.ENSP00000265728,9606.ENSP00000271452,9606.ENSP00000288207,9606.ENSP00000296417,9606.ENSP00000296503,9606.ENSP00000296509,9606.ENSP00000300093,9606.ENSP00000300403,9606.ENSP00000302530,…	KIF22,AURKA,FBXO5,DDX39A,DLGAP5,PIMREG,NCAPG,KIF23,NDC80,SGO1,DBF4,NUF2,CCNB2,H2AZ1,HMGB2,MAD2L1,PLK1,TPX2,BUB1,MIS18BP1,CKS1B,AURKB,TUBB4B,SMC4,UBE2C,SGO2,BUB3,PSRC1,CDCA8,ZWINT,ECT2,PRC1,KIF20A,CDK1,TOP2A,HJURP,GTSE1,PBK,KPNA2,CCNA2,UBE2T,NUSAP1
COMPARTMENTS	GOCC:0032133	Chromosome passenger complex	3	7	2.18	1.27	0.00018	9606.ENSP00000216911,9606.ENSP00000313950,9606.ENSP00000362146	AURKA,AURKB,CDCA8
COMPARTMENTS	GOCC:0033597	Mitotic checkpoint complex	3	7	2.18	1.27	0.00018	9606.ENSP00000296509,9606.ENSP00000302530,9606.ENSP00000357858	MAD2L1,BUB1,BUB3
COMPARTMENTS	GOCC:0000940	Condensed chromosome outer kinetochore	3	13	1.91	1.05	0.00071	9606.ENSP00000261597,9606.ENSP00000300093,9606.ENSP00000313950	NDC80,PLK1,AURKB
COMPARTMENTS	GOCC:0110165	Cellular anatomical entity	53	14060	0.12	0.29	0.00078	9606.ENSP00000160827,9606.ENSP00000216911,9606.ENSP00000229758,9606.ENSP00000242776,9606.ENSP00000247191,9606.ENSP00000249776,9606.ENSP00000250056,9606.ENSP00000251496,9606.ENSP00000260363,9606.ENSP00000260731,9606.ENSP00000261597,9606.ENSP00000263753,9606.ENSP00000265728,9606.ENSP00000271452,9606.ENSP00000282074,9606.ENSP00000288207,9606.ENSP00000296417,9606.ENSP00000296503,9606.ENSP00000296509,…	KIF22,AURKA,FBXO5,DDX39A,DLGAP5,KNSTRN,PIMREG,NCAPG,KIF23,KIF11,NDC80,SGO1,DBF4,NUF2,SPC25,CCNB2,H2AZ1,HMGB2,MAD2L1,PLK1,TPX2,BUB1,CKAP2L,MIS18BP1,CKS1B,AURKB,TUBA1B,TUBB4B,SMC4,UBE2C,SGO2,RRM2,BUB3,TTK,PSRC1,KIF2C,CDCA8,ZWINT,CKAP2,ECT2,PRC1,KIF20A,CDK1,TOP2A,HJURP,GTSE1,PBK,KPNA2,CDCA3,CCNA2,FAM83D,UBE2T,NUSAP1
COMPARTMENTS	GOCC:0005829	Cytosol	21	3054	0.38	0.39	0.0031	9606.ENSP00000160827,9606.ENSP00000216911,9606.ENSP00000247191,9606.ENSP00000251496,9606.ENSP00000260363,9606.ENSP00000260731,9606.ENSP00000282074,9606.ENSP00000288207,9606.ENSP00000296509,9606.ENSP00000300093,9606.ENSP00000302530,9606.ENSP00000313950,9606.ENSP00000341289,9606.ENSP00000348838,9606.ENSP00000353770,9606.ENSP00000358925,9606.ENSP00000361298,9606.ENSP00000376457,9606.ENSP00000378699,…	KIF22,AURKA,DLGAP5,NCAPG,KIF23,KIF11,SPC25,CCNB2,MAD2L1,PLK1,BUB1,AURKB,TUBB4B,UBE2C,RRM2,PSRC1,KIF2C,ECT2,CDK1,KPNA2,CCNA2
COMPARTMENTS	GOCC:0070090	Metaphase plate	2	4	2.25	0.75	0.0066	9606.ENSP00000302530,9606.ENSP00000313950	BUB1,AURKB
COMPARTMENTS	GOCC:0097149	Centralspindlin complex	2	4	2.25	0.75	0.0066	9606.ENSP00000260363,9606.ENSP00000376457	KIF23,ECT2
COMPARTMENTS	GOCC:0098654	CENP-A recruiting complex	2	5	2.15	0.7	0.0088	9606.ENSP00000309790,9606.ENSP00000414109	MIS18BP1,HJURP
COMPARTMENTS	GOCC:1990706	MAD1 complex	2	5	2.15	0.7	0.0088	9606.ENSP00000302530,9606.ENSP00000357858	BUB1,BUB3
COMPARTMENTS	GOCC:1990728	Mitotic spindle assembly checkpoint MAD1-MAD2 complex	2	5	2.15	0.7	0.0088	9606.ENSP00000296509,9606.ENSP00000357858	MAD2L1,BUB3
COMPARTMENTS	GOCC:0031616	Spindle pole centrosome	2	8	1.94	0.6	0.0175	9606.ENSP00000216911,9606.ENSP00000247191	AURKA,DLGAP5
COMPARTMENTS	GOCC:0000307	Cyclin-dependent protein kinase holoenzyme complex	3	48	1.34	0.54	0.02	9606.ENSP00000288207,9606.ENSP00000378699,9606.ENSP00000481380	CCNB2,CDK1,CCNA2
COMPARTMENTS	GOCC:0072687	Meiotic spindle	2	9	1.89	0.57	0.0205	9606.ENSP00000216911,9606.ENSP00000229758	AURKA,FBXO5
COMPARTMENTS	GOCC:0000796	Condensin complex	2	10	1.85	0.55	0.024	9606.ENSP00000251496,9606.ENSP00000341382	NCAPG,SMC4
COMPARTMENTS	GOCC:0005876	Spindle microtubule	3	67	1.2	0.42	0.0475	9606.ENSP00000313950,9606.ENSP00000377793,9606.ENSP00000378699	AURKB,PRC1,CDK1
